# Supplementary material
Source: publisher figshare collection journal article supplement (https://karger.figshare.com/articles/dataset/_/24151494)
Supplement: Supplementary file 1 [file 1]

## Sheet: Summary
Table S4. DEGs, GO terms for corpus luteum, Related to Figure 6 and 7.
The sub-table 'cluster 2/3/6/9' shows the differentially expressed genes (P value <0.05, FC>1.5) among different corpus luteum clusters
The sub-table 'GO-2/3/6/9' show the representative GO terms of upregulated genes in corpus luteum
The sub-table 'DEG C2-9 vs C3-6' shows the differentially expressed genes (P value <0.05, FC>1.5) between cluster2/9 and cluster3/6
The sub-table 'DEG in C2-9' shows the differentially expressed genes (P value <0.05, FC>1.5) between old and young cluster2/9
The sub-table 'DEG in C3-6' shows the differentially expressed genes (P value <0.05, FC>1.5) between old and young cluster3/6
The sub-table 'GO in C2-9' show the top 20 GO terms of downregulated DEGs between old and young Cluster2/9
The sub-table 'GO in C3-6' show the top 20 GO terms of downregulated DEGs between old and young Cluster3/6

## Sheet: cluster2
Tag	logFC	AveExpr	P.Value	adj.P.Val	B
Tsx	2.35428	1.52386	1.84151e-155	6.37209e-152	344.592
Cst12	2.33696	1.71107	4.06814e-138	7.03839e-135	304.812
Tmem184a	2.05244	1.68452	6.52127e-159	3.0087e-155	352.506
Aard	1.92644	1.17695	1.84185e-135	2.83256e-132	298.72
Gstm6	1.91448	1.49274	7.68638e-140	1.77312e-136	308.765
Cldn11	1.83853	1.68168	1.15461e-139	2.283e-136	308.36
Tagln	1.75686	2.42341	5.88929e-125	5.8224e-122	274.624
Acsbg1	1.63576	1.90311	1.85143e-102	7.11824e-100	223.016
Bok	1.52905	1.79459	1.27402e-126	1.35644e-123	278.443
Cyp17a1	1.49238	1.65194	1.23009e-55	8.75174e-54	115.655
Mt3	1.42823	2.04646	1.24737e-87	2.65612e-85	189.004
Ass1	1.37211	1.81388	2.65787e-57	2.0213e-55	119.47
Adgrg1	1.32161	1.6706	1.90856e-106	9.43444e-104	232.162
Gstm7	1.29673	1.95489	2.18141e-87	4.57469e-85	188.447
Myl9	1.22871	2.92412	5.14043e-99	1.58108e-96	215.118
Col18a1	1.15703	2.6066	5.69196e-100	1.83215e-97	217.31
Myh11	1.15311	1.26235	4.43173e-74	6.07323e-72	157.929
Timp2	1.13189	2.41457	1.03463e-61	9.00651e-60	129.576
Tf	1.12665	2.1777	1.88937e-82	3.39621e-80	177.123
Reep2	1.11358	0.966567	3.58023e-75	5.2162e-73	160.435
Tpm2	1.08777	1.94253	7.01864e-71	8.37457e-69	150.593
Clu	1.06755	3.84645	1.40575e-83	2.70236e-81	179.711
Igfbp6	1.06545	1.761	1.23489e-57	9.49563e-56	120.233
Lcn2	1.06491	1.14959	4.05583e-64	4.00977e-62	135.092
Bex3	1.06221	2.2314	6.37142e-44	2.89137e-42	88.8274
Mat2a	1.05765	2.69477	9.61381e-66	1.03957e-63	138.817
Fabp3	1.05274	1.83053	9.9459e-32	2.67303e-30	60.9408
Wfdc10a	1.04102	1.25114	3.54949e-51	2.09951e-49	105.437
Glb1l3	1.03522	0.675318	6.86054e-71	8.25711e-69	150.616
Defb24	1.02953	0.903238	8.88883e-52	5.34914e-50	106.815
Actg2	1.01083	1.0861	1.88898e-63	1.79078e-61	133.561
Fabp5	1.00855	1.93549	3.62841e-49	1.99289e-47	100.835
Csrp1	1.00782	2.11945	4.26975e-71	5.22987e-69	151.088
Enc1	1.003	1.57304	1.54472e-40	5.95557e-39	81.0817
Wfdc1	0.999359	1.08468	3.367e-64	3.35271e-62	135.277
Mdk	0.964573	1.52841	1.06362e-54	7.21643e-53	113.508
Gatm	0.964031	0.859059	2.89894e-65	3.03971e-63	137.719
Sin3b	0.958548	2.01602	3.96221e-57	2.96438e-55	119.073
Marcksl1	0.944747	2.19149	2.42752e-65	2.56483e-63	137.895
Inha	0.935522	5.05408	3.97594e-83	7.43662e-81	178.676
Rarres2	0.929365	1.1439	2.86565e-59	2.37506e-57	123.979
Egr1	0.928473	1.93244	7.77586e-42	3.16546e-40	84.052
Akr1b10	0.928207	1.13582	1.81509e-23	3.01593e-22	42.0886
Dcn	0.922204	2.08684	6.90819e-44	3.12471e-42	88.747
Lsr	0.897096	1.34455	7.26204e-50	4.11942e-48	102.435
Ttyh1	0.8969	0.523061	9.83747e-76	1.48e-73	161.721
Zyx	0.890946	2.0352	1.47043e-58	1.18327e-56	122.351
Mmd2	0.889428	2.16847	7.43457e-39	2.73675e-37	77.2328
Cebpd	0.876813	1.34233	3.34616e-44	1.53868e-42	89.4676
Des	0.864386	0.890324	1.57047e-50	9.09492e-49	103.958
Wt1	0.849703	0.781129	2.1353e-55	1.50024e-53	115.106
Csrp2	0.848633	1.7271	4.70584e-46	2.26946e-44	93.707
LOC103694892	0.845142	3.70793	3.34446e-19	4.0929e-18	32.3789
Plet1	0.832538	1.7002	2.68016e-21	3.85615e-20	37.1478
Aldh1a1	0.820649	1.19459	2.31193e-38	8.35495e-37	76.1057
Igfbp5	0.786293	1.09566	5.22545e-31	1.34434e-29	59.2949
Tceal9	0.781563	2.34569	8.6588e-34	2.52308e-32	65.6485
Ptprv	0.775043	0.522946	2.52999e-62	2.28873e-60	130.978
Ldhb	0.774822	2.58209	4.32635e-45	2.05777e-43	91.5013
Nppc	0.765088	1.35644	1.36737e-17	1.45807e-16	28.7169
Dhh	0.750173	0.535989	3.80433e-61	3.29099e-59	128.28
Emp3	0.743225	2.14359	5.6731e-35	1.74881e-33	68.3541
Prkar2b	0.742723	1.63536	3.12761e-34	9.28953e-33	66.6593
Tpm1	0.740034	1.64868	1.0276e-37	3.61909e-36	74.6239
Mylk	0.735731	1.39519	1.15015e-36	3.84523e-35	72.2251
RGD1564664	0.729019	1.58785	1.60096e-29	3.81391e-28	55.9006
LOC100364435	0.727822	5.13085	1.112e-59	9.32797e-58	124.921
Gstm3	0.727772	1.086	3.80591e-34	1.12559e-32	66.4645
Isyna1	0.721127	2.47417	5.29519e-35	1.63595e-33	68.4225
Rps10l1	0.719057	3.83618	7.94645e-47	3.97064e-45	95.4756
Flna	0.717605	3.02559	2.45656e-55	1.71723e-53	114.966
Ctsk	0.710883	1.10398	2.21716e-36	7.34157e-35	71.5733
Mpzl2	0.69955	0.458374	7.31399e-53	4.56004e-51	109.299
Amhr2	0.694797	0.669135	2.07758e-42	8.82081e-41	85.3638
Cd9	0.670694	0.96105	6.70723e-33	1.88689e-31	63.6166
Junb	0.659666	2.27887	1.09165e-25	2.11619e-24	47.1516
Acta2	0.657999	1.40567	3.50739e-31	9.12515e-30	59.6904
Etnk2	0.657744	1.24751	1.01905e-30	2.57384e-29	58.6323
Penk	0.646725	1.18277	7.25534e-27	1.53549e-25	49.8375
Asns	0.644741	1.16492	4.09071e-20	5.31639e-19	34.4542
Igfbp2	0.64047	2.03121	1.37429e-18	1.6079e-17	30.9837
Rpl36	0.640368	3.99797	1.34448e-40	5.21261e-39	81.2197
AC128207.1	0.634386	0.690845	2.34947e-28	5.28763e-27	53.2372
Ckb	0.625881	1.59982	3.34085e-27	7.25914e-26	50.606
Pja1	0.625709	1.16573	4.12908e-30	1.02055e-28	57.2445
Ece1	0.618413	1.78035	1.96636e-30	4.91271e-29	57.9803
Mapkapk2	0.612297	2.41674	3.41634e-27	7.41152e-26	50.5839
Rnf187	0.597561	1.97724	1.67178e-28	3.78708e-27	53.5746
Insl3	0.593392	1.63867	2.23046e-11	1.43256e-10	14.6551
Oas1a	0.59246	0.769192	7.84858e-29	1.80752e-27	54.3243
Cst3	0.588272	4.0065	1.85712e-37	6.45841e-36	74.0361
Prrx2	-0.585129	0.614625	1.20077e-34	3.65272e-33	67.6097
Snapin	-0.585133	1.6311	6.67717e-26	1.31277e-24	47.6385
Mcrip2	-0.585194	1.45063	1.93725e-21	2.82544e-20	37.4688
Tax1bp3	-0.585224	1.94851	9.89071e-27	2.07106e-25	49.5305
Bcl2l11	-0.586443	0.704574	1.65451e-32	4.57087e-31	62.7206
Coasy	-0.586632	1.02911	2.4673e-26	5.01468e-25	48.6248
Pdlim1	-0.58701	1.117	7.31288e-24	1.24193e-22	42.9884
Auh	-0.587223	0.915897	4.66782e-30	1.14755e-28	57.1229
Ap1s1	-0.588417	1.81926	7.43055e-25	1.36764e-23	45.2522
Bscl2	-0.588508	1.17222	3.05293e-26	6.15972e-25	48.4138
Epas1	-0.588922	1.96669	2.05304e-28	4.62803e-27	53.3709
Syf2	-0.589218	1.61493	8.46308e-27	1.78836e-25	49.685
Uso1	-0.592056	1.28098	3.09282e-28	6.91563e-27	52.9647
Pdlim2	-0.592664	0.875897	6.80124e-27	1.44825e-25	49.9016
Prkcsh	-0.593087	2.6494	1.21293e-30	3.05796e-29	58.4596
Gpnmb	-0.594947	1.48981	1.03636e-16	1.0417e-15	26.72
Pccb	-0.596054	1.43178	1.42376e-26	2.92813e-25	49.1695
Txnrd1	-0.59672	1.39716	1.5818e-25	3.04079e-24	46.7843
Cox14	-0.598075	0.890482	5.73893e-29	1.34177e-27	54.6346
Agrn	-0.598157	1.12159	3.25232e-27	7.07789e-26	50.6326
Cptp	-0.599234	0.630004	2.70693e-37	9.251e-36	73.6619
Creld1	-0.599546	1.30294	6.24189e-27	1.33324e-25	49.9866
Slc50a1	-0.602536	1.10285	9.99359e-28	2.21314e-26	51.8021
Sri	-0.602829	0.83836	1.86153e-32	5.12235e-31	62.6036
Tyrobp	-0.603236	1.50918	1.07021e-19	1.35897e-18	33.5042
Rab7a	-0.604259	2.46684	7.28028e-34	2.13037e-32	65.8206
Gaa	-0.604843	2.83204	4.07605e-34	1.20291e-32	66.3964
Mrps36	-0.605524	1.39224	5.88711e-25	1.09227e-23	45.4827
Myl12a	-0.60572	3.24636	4.04607e-36	1.31151e-34	70.976
Erlec1	-0.606256	1.28124	8.12483e-31	2.07483e-29	58.857
Echdc1	-0.607055	0.975663	2.87938e-28	6.44879e-27	53.0356
Cyyr1	-0.608173	0.722133	1.07977e-33	3.12659e-32	65.4294
Eci2	-0.61021	1.74332	3.39509e-29	7.97818e-28	55.1552
Oxct1	-0.610311	1.15802	8.76267e-26	1.71064e-24	47.3693
Pdhb	-0.611896	1.47357	1.0613e-26	2.21227e-25	49.4607
Surf4	-0.612723	2.44569	6.03552e-36	1.93374e-34	70.5789
Ybx1-ps3	-0.612917	1.22065	8.37249e-25	1.53285e-23	45.134
LOC294154	-0.613314	1.75605	8.73622e-25	1.59312e-23	45.0919
Tars	-0.613334	1.3727	6.06211e-29	1.40781e-27	54.5803
Amdhd1	-0.614764	0.616962	1.04132e-22	1.63782e-21	40.36
Colec12	-0.618474	0.931348	1.7606e-23	2.93243e-22	42.1188
Tmco4	-0.619122	0.650088	4.47754e-39	1.6795e-37	77.7365
Polr3g	-0.619555	0.553602	7.59334e-42	3.10028e-40	84.0757
Cox6a1	-0.620573	4.25152	5.57602e-56	4.01967e-54	116.442
Hint2	-0.621112	1.52739	4.48761e-26	8.95001e-25	48.0322
Slc22a17	-0.621118	2.05604	5.40005e-24	9.25026e-23	43.2885
Scd	-0.621759	0.517462	5.19669e-43	2.269e-41	86.7411
Tril	-0.622883	1.03459	2.39731e-28	5.38655e-27	53.2172
Tex2	-0.623028	0.744475	6.8432e-39	2.52578e-37	77.3151
Dhrs4	-0.623148	0.913014	4.40199e-32	1.19701e-30	61.7495
Nubp2	-0.623348	0.971339	3.3899e-32	9.25436e-31	62.0088
Msmo1	-0.623566	2.73374	8.77823e-27	1.85213e-25	49.6487
Vnn3	-0.623649	0.557998	1.96254e-42	8.35801e-41	85.4204
Vapa	-0.623724	3.37227	1.42627e-47	7.33867e-46	97.1836
Nr1d1	-0.625107	1.03664	4.9692e-30	1.21732e-28	57.0608
Arhgef2	-0.625304	0.979356	4.85675e-29	1.13743e-27	54.8001
Plp2	-0.626183	1.16413	7.79445e-29	1.79805e-27	54.3311
Bckdha	-0.626868	2.55313	5.51786e-28	1.23182e-26	52.3909
Tsr3	-0.62722	1.01916	1.95973e-31	5.16659e-30	60.2679
C1qb	-0.627549	1.73638	1.83197e-20	2.45462e-19	35.248
Blvrb	-0.627717	1.12845	1.30621e-29	3.13332e-28	56.1024
Slc16a13	-0.627931	0.686095	9.27656e-37	3.12401e-35	72.4386
Idh3B	-0.628227	1.56902	1.55283e-29	3.71845e-28	55.9308
Ndufs3	-0.628918	1.81863	7.84196e-28	1.74783e-26	52.0424
Cemip	-0.628959	0.730122	2.10054e-32	5.76857e-31	62.4837
LOC100360087	-0.629305	1.67366	5.64339e-30	1.38004e-28	56.9346
Tom1l1	-0.629569	0.637701	6.057e-38	2.15514e-36	75.149
NEWGENE-6497122	-0.62983	0.930925	2.12993e-32	5.8377e-31	62.4699
Igfbp7	-0.631104	4.25735	2.23102e-41	8.89901e-40	83.0046
Tpst2	-0.632167	0.853533	1.67054e-34	5.02651e-33	67.2819
Akip1	-0.634625	0.92361	6.89229e-33	1.9311e-31	63.5896
LOC691807	-0.637357	1.74035	7.55985e-29	1.74729e-27	54.3614
Scx	-0.637453	1.47241	7.89209e-15	6.81862e-14	22.4537
Ap2s1	-0.637918	2.33338	4.80808e-30	1.17994e-28	57.0935
Maged2	-0.639203	2.4206	2.95556e-30	7.37081e-29	57.5761
Nceh1	-0.639322	0.845542	4.02875e-30	9.97531e-29	57.2689
Emcn	-0.640279	0.932562	1.47465e-33	4.25222e-32	65.12
Pmm2	-0.64072	0.908178	1.57008e-34	4.75524e-33	67.3434
Slc6a8	-0.643102	1.30792	9.43719e-29	2.16617e-27	54.1415
Emc7	-0.643327	1.6991	2.36446e-32	6.46769e-31	62.3662
Dpcd	-0.643501	1.04673	2.27607e-29	5.37595e-28	55.5517
Atp6v1b2	-0.64357	1.45323	3.62563e-30	9.00939e-29	57.3735
Fam53b	-0.64468	0.774886	1.47708e-35	4.62541e-34	69.6902
Cdkn1b	-0.646148	0.625563	1.2267e-38	4.49175e-37	76.7353
Nmrk1	-0.647202	0.611828	9.78046e-42	3.94669e-40	83.8241
Mroh1	-0.647423	1.03638	4.17315e-30	1.02777e-28	57.234
Ide	-0.647585	1.28363	2.62204e-29	6.17206e-28	55.4114
Wwc3	-0.648377	0.910881	5.38314e-33	1.52057e-31	63.8348
Smim14	-0.649504	1.48068	1.78655e-31	4.719e-30	60.3597
Rsrp1	-0.64951	2.85106	6.44655e-37	2.18158e-35	72.8001
Eral1	-0.649828	0.655318	1.63405e-44	7.58954e-43	90.1801
Coq9	-0.649997	1.15812	1.95588e-29	4.64346e-28	55.702
Chn2	-0.650234	0.683184	1.56872e-36	5.2194e-35	71.9169
Saraf	-0.651014	1.72161	1.65451e-34	4.98914e-33	67.2914
Cilp2	-0.651104	0.570533	2.08678e-47	1.06975e-45	96.8052
Sdhc	-0.651239	1.9105	4.78138e-34	1.40806e-32	66.238
Ngly1	-0.651461	0.82833	1.88324e-35	5.88395e-34	69.449
Qdpr	-0.651709	1.3206	1.55857e-31	4.14052e-30	60.4951
Polr2k	-0.653011	1.82831	8.00079e-34	2.33626e-32	65.7269
Rab2a	-0.653328	0.699605	8.58518e-42	3.47449e-40	83.9536
Cd68	-0.656306	0.814799	6.64954e-32	1.79758e-30	61.3402
Cpt1a	-0.656398	1.58796	9.74773e-28	2.16562e-26	51.8268
Wfs1	-0.656524	0.878725	8.35048e-35	2.54579e-33	67.9703
Got2	-0.656546	2.29248	1.04581e-31	2.80525e-30	60.8909
Mrpl18	-0.656563	1.02611	2.4185e-33	6.90194e-32	64.629
Mrpl37	-0.656872	1.57442	4.01298e-30	9.95406e-29	57.2728
Arl6ip5	-0.657432	1.06674	3.25813e-31	8.4926e-30	59.7635
Sirt2	-0.657658	1.45028	4.46659e-27	9.62962e-26	50.3182
Glmp	-0.657878	2.72216	3.13773e-34	9.29965e-33	66.6561
Cmpk1	-0.658284	1.13527	1.78846e-32	4.93108e-31	62.6433
Sh3glb1	-0.6583	1.23903	4.24451e-33	1.20139e-31	64.0707
Txn1	-0.659833	1.99615	2.42039e-36	7.97634e-35	71.4862
Mtus1	-0.660424	0.973601	8.98382e-31	2.28156e-29	58.7574
Nfe2l1	-0.661506	0.780545	1.13557e-36	3.80566e-35	72.2378
Uhrf1bp1l	-0.66182	1.56278	8.81803e-34	2.56408e-32	65.6304
Herpud1	-0.662077	3.16175	3.42992e-38	1.23629e-36	75.7139
Med14	-0.663131	1.21096	1.22977e-31	3.27962e-30	60.7302
Acat1	-0.667301	1.49568	1.80682e-27	3.95074e-26	51.2152
Ndufs2	-0.668049	2.52857	3.05745e-42	1.28237e-40	84.9798
Taf13	-0.668398	0.88926	3.56997e-36	1.16538e-34	71.1003
Park7	-0.669488	3.19904	7.4895e-46	3.59938e-44	93.245
Slc20a2	-0.669646	0.72206	1.32455e-35	4.1666e-34	69.7984
Zbed5	-0.669676	2.60665	3.40281e-43	1.49045e-41	87.162
Bet1	-0.669715	0.969246	1.50501e-38	5.48181e-37	76.5322
Rps27a	-0.670111	5.48807	8.51265e-50	4.80913e-48	102.277
Spg7	-0.670638	1.02026	2.02477e-35	6.31192e-34	69.377
Rheb	-0.671017	1.91718	2.73093e-34	8.1639e-33	66.7939
Ndufa4	-0.675674	4.03686	2.01442e-56	1.47522e-54	117.455
Pcyt2	-0.675726	1.60173	4.16142e-30	1.02671e-28	57.2368
Hibadh	-0.676779	1.51375	1.5351e-32	4.25797e-31	62.7949
Impdh1	-0.677569	1.60935	4.10573e-31	1.06219e-29	59.5341
Uqcrc2	-0.680215	1.89601	7.88386e-36	2.49704e-34	70.3136
Gnpat	-0.68131	1.01753	1.34209e-35	4.21222e-34	69.7853
Hsd17b11	-0.683227	1.14085	6.8081e-36	2.16623e-34	70.4592
Opa1	-0.683329	0.752706	6.74413e-42	2.7617e-40	84.1935
Esrra	-0.683688	1.11436	9.87383e-34	2.86507e-32	65.5181
Anxa7	-0.684245	1.32303	3.8873e-31	1.00757e-29	59.5884
Laptm4b	-0.684699	2.99016	7.32432e-43	3.14832e-41	86.4
Aif1	-0.68545	0.91163	6.7896e-33	1.90618e-31	63.6045
Sts	-0.685534	0.964284	1.99363e-37	6.91574e-36	73.9657
Hmbs	-0.686735	1.10126	2.36717e-31	6.21709e-30	60.0805
Cdhr5	-0.686814	0.65465	1.27005e-44	5.93879e-43	90.4306
Cyb5a	-0.686843	2.13983	5.636e-40	2.15491e-38	79.7956
Uqcr10	-0.687245	3.7792	2.16221e-62	1.98193e-60	131.134
Parp3	-0.688189	0.782157	4.30071e-38	1.54213e-36	75.4892
Atp6ap1	-0.689053	1.77387	8.51089e-36	2.68948e-34	70.2376
Suclg2	-0.689146	2.056	5.88791e-35	1.81099e-33	68.3172
Ubc	-0.689725	4.79576	2.50331e-92	6.53741e-90	199.778
Mtss1	-0.693755	0.842199	1.02665e-40	3.99155e-39	81.4877
Ccnk	-0.694667	0.934546	3.90936e-39	1.47037e-37	77.8713
Pnp	-0.694773	0.922855	3.05779e-34	9.10169e-33	66.6817
Pink1	-0.695139	1.31206	5.31884e-32	1.44067e-30	61.5618
Mtap	-0.695729	0.914723	1.01281e-36	3.40252e-35	72.3514
Acot7	-0.696466	1.17306	3.01131e-33	8.55844e-32	64.4114
Atp5f1b	-0.698085	4.88413	1.1131e-79	1.8341e-77	170.77
Sgcg	-0.698395	0.618327	1.29368e-46	6.37219e-45	94.991
Acox1	-0.699183	1.28887	1.51194e-33	4.35069e-32	65.0952
Rgs3	-0.699769	2.23372	6.44147e-39	2.39025e-37	77.3752
Orm1	-0.70236	0.842638	2.57311e-21	3.70598e-20	37.1881
Pomgnt1	-0.703051	1.41411	1.01649e-32	2.82514e-31	63.204
Akr1a1	-0.704132	3.40712	4.55078e-59	3.70514e-57	123.518
Parp9	-0.704358	1.80628	2.62793e-37	9.00326e-36	73.6913
Sdc3	-0.70452	1.13528	5.83082e-34	1.70984e-32	66.041
Cdc42	-0.706177	1.4891	4.59062e-41	1.81022e-39	82.2875
Prdx6	-0.706303	3.09436	4.10228e-52	2.49033e-50	107.584
Atp5mg	-0.706376	4.19405	7.41186e-72	9.54814e-70	152.831
Chp1	-0.709533	1.41106	2.06466e-33	5.90432e-32	64.786
Rab5if	-0.710291	2.67158	1.3503e-50	7.85271e-49	104.108
Ccl6	-0.716692	0.787937	6.42545e-36	2.05392e-34	70.5167
Spata6	-0.718831	0.787693	6.01285e-40	2.29267e-38	79.7313
Sbsn	-0.719499	0.874853	4.80126e-36	1.54186e-34	70.806
Acadl	-0.719936	1.43939	5.33398e-38	1.90277e-36	75.2753
Bpifb6	-0.720892	0.780403	1.79619e-37	6.26224e-36	74.0693
Ndufv3	-0.722281	1.64731	3.618e-37	1.22737e-35	73.3738
Folr1	-0.722766	3.24518	3.3432e-44	1.53868e-42	89.4685
Rogdi	-0.723268	1.50819	1.61253e-31	4.26751e-30	60.4613
Clec2g	-0.724191	1.62605	1.56858e-33	4.50429e-32	65.0587
Wdr45	-0.724592	0.89088	1.05967e-42	4.54083e-41	86.0329
Pdha1	-0.725249	1.50366	2.45242e-36	8.0627e-35	71.4732
Mob4	-0.726483	2.61569	1.37024e-49	7.70957e-48	101.803
Atp5f1a	-0.726651	3.26995	3.42103e-46	1.65561e-44	94.024
Aco1	-0.727419	1.13957	4.28536e-36	1.3826e-34	70.9189
Prcp	-0.729601	0.853917	1.51166e-39	5.73231e-38	78.8153
Acad10	-0.730009	1.044	1.87054e-41	7.4827e-40	83.1797
Pmpca	-0.730323	1.37323	4.54248e-35	1.40654e-33	68.5747
Tmem30a	-0.731473	1.31149	3.8485e-38	1.38356e-36	75.5995
Greb1	-0.732285	1.90659	1.08184e-31	2.89067e-30	60.8573
Sdha	-0.732745	2.22812	5.69242e-43	2.46215e-41	86.6506
Slc25a3	-0.732778	4.25653	9.04739e-102	3.2109e-99	221.436
Sqle	-0.73352	1.05821	7.5352e-37	2.54377e-35	72.6451
Itgae	-0.735939	1.10567	9.07921e-38	3.21395e-36	74.7469
Ahnak	-0.736078	2.79115	2.49985e-34	7.48927e-33	66.8817
Babam2	-0.736122	1.349	6.70073e-36	2.13698e-34	70.475
Mindy1	-0.736386	1.08001	2.35254e-37	8.08272e-36	73.8013
Fech	-0.737692	1.08422	1.44309e-38	5.27015e-37	76.5739
Aifm2	-0.737759	1.07983	1.79834e-39	6.80079e-38	78.6428
Fam91a1	-0.741306	1.99036	1.31731e-37	4.60425e-36	74.3773
Prlr	-0.741703	0.850768	1.46979e-40	5.68251e-39	81.1311
Hmox1	-0.742619	1.4599	6.63456e-38	2.35459e-36	75.0585
Ctps1	-0.743347	1.8049	2.16923e-42	9.18176e-41	85.3209
Jam2	-0.743742	2.14591	5.69315e-39	2.12396e-37	77.4979
Hsd17b8	-0.74484	1.46056	2.1512e-38	7.79444e-37	76.1773
Lonp1	-0.745142	2.22097	7.58467e-41	2.96552e-39	81.7885
Kifc3	-0.746061	1.57758	2.27231e-36	7.50621e-35	71.5489
Sqstm1	-0.746434	3.21962	3.10505e-56	2.26194e-54	117.024
Atp5if1	-0.747293	3.23499	5.79325e-55	3.98927e-53	114.113
Arl5a	-0.748489	0.828578	6.63221e-45	3.14371e-43	91.0766
Rab1a	-0.748978	2.16844	1.20083e-47	6.24839e-46	97.3547
Ttc39a	-0.749437	0.766554	6.49177e-42	2.67419e-40	84.2314
Clip1	-0.750462	1.05885	2.87961e-36	9.4447e-35	71.3137
Ypel5	-0.750548	1.88505	1.08026e-35	3.40591e-34	70.0008
Tcirg1	-0.750824	1.69813	1.74562e-30	4.36909e-29	58.0984
Pacsin2	-0.753603	1.48322	7.58512e-33	2.12092e-31	63.4945
Sdhb	-0.755238	2.72929	4.81301e-50	2.74143e-48	102.844
Cpe	-0.757145	0.98941	3.57131e-27	7.72353e-26	50.5399
Hmgcl	-0.761509	1.2298	2.85153e-42	1.19964e-40	85.0491
Cryba4	-0.762976	0.84201	4.9004e-44	2.23113e-42	89.0883
Ndufa12	-0.763441	2.67978	2.96499e-50	1.70284e-48	103.326
Tspan12	-0.763797	0.722114	2.74212e-54	1.8514e-52	112.566
Sdf4	-0.764405	3.10899	1.99722e-56	1.4704e-54	117.464
Ctsb	-0.765481	4.43173	6.36051e-95	1.72619e-92	205.73
Hspd1	-0.765599	4.54205	6.17726e-89	1.40163e-86	191.997
Pnpla8	-0.765892	1.39304	4.10224e-36	1.32661e-34	70.9623
Pfdn1	-0.766777	2.47213	2.72388e-37	9.28603e-36	73.6557
Itgb1bp1	-0.766962	1.12649	3.47928e-44	1.59459e-42	89.4288
Tmem70	-0.769068	1.12904	2.79473e-41	1.10836e-39	82.7807
Trappc6a	-0.769129	1.85597	2.1634e-37	7.46724e-36	73.8845
Atp5f1c	-0.76975	2.4579	2.45859e-41	9.77856e-40	82.908
Mrps23	-0.770931	1.9764	5.91096e-41	2.32425e-39	82.0363
Chst12	-0.771132	0.730637	4.06473e-51	2.39404e-49	105.302
Bnip3	-0.771736	0.928506	8.77205e-49	4.79897e-47	99.9569
Cox5a	-0.773587	3.09429	7.43659e-62	6.59807e-60	129.905
Plekhb2	-0.774133	1.81779	1.42295e-43	6.39449e-42	88.0287
Txn2	-0.774167	2.03056	2.33189e-48	1.24617e-46	98.9845
Ndfip1	-0.777637	3.26836	1.16134e-53	7.65793e-52	111.13
Acss1	-0.778057	1.01505	1.04317e-44	4.91107e-43	90.6263
Gtf2b	-0.781795	1.19929	4.5387e-42	1.88084e-40	84.5871
Lpcat3	-0.783746	2.79317	1.50906e-41	6.05417e-40	83.3931
Ufc1	-0.784402	2.23036	1.4905e-46	7.31559e-45	94.8502
Htatip2	-0.784493	1.21388	1.26495e-41	5.08958e-40	83.5685
Rpn2	-0.786347	2.73518	4.21646e-55	2.918e-53	114.429
Itfg1	-0.786444	1.82035	1.16657e-43	5.25947e-42	88.2261
Serpinb6a	-0.786764	2.10053	3.30798e-46	1.60652e-44	94.0575
Rangap1	-0.790599	1.86932	3.17356e-37	1.07925e-35	73.5039
Runx2	-0.790854	1.07932	2.55045e-43	1.13144e-41	87.4486
Dag1	-0.791997	3.24664	6.94138e-43	2.99301e-41	86.4534
Tns4	-0.792275	0.80747	1.92817e-48	1.04249e-46	99.1736
Neurl2	-0.792727	0.662723	2.19682e-49	1.22113e-47	101.334
Sptan1	-0.794154	2.78782	3.59765e-49	1.98387e-47	100.843
Apmap	-0.797395	1.19147	2.59409e-43	1.14712e-41	87.4317
Acadvl	-0.797442	1.77958	2.19242e-43	9.78882e-42	87.599
Dtx3l	-0.798213	2.60643	3.10874e-58	2.47288e-56	121.606
Glb1	-0.798278	1.41905	6.40201e-41	2.5102e-39	81.957
Etfdh	-0.801192	1.14296	2.36362e-46	1.156e-44	94.3917
Glod4	-0.801206	1.29429	6.17408e-42	2.55091e-40	84.2813
Mpc2	-0.802679	0.834642	9.90532e-53	6.12052e-51	108.997
Farp1	-0.802699	1.04486	9.58296e-47	4.75404e-45	95.2894
Slc35f6	-0.803721	1.30065	4.39832e-41	1.73935e-39	82.33
AC133739.1	-0.803982	0.74965	4.29366e-53	2.71363e-51	109.829
Pnpo	-0.805699	1.15822	7.1413e-45	3.37347e-43	91.003
Ndufa10l1	-0.806215	1.22524	1.32462e-47	6.8667e-46	97.2571
Ltn1	-0.807829	1.17964	1.32755e-44	6.18672e-43	90.3866
Hbs1l	-0.808108	1.2679	5.65588e-43	2.45402e-41	86.657
Nit1	-0.809	1.97476	3.52439e-42	1.46931e-40	84.8385
Lamp2	-0.809869	2.23602	1.38514e-49	7.76182e-48	101.793
Tmem147	-0.810102	2.23789	9.07021e-39	3.32999e-37	77.0352
Kdr	-0.810576	1.17758	2.52744e-43	1.12483e-41	87.4576
AABR07026294.1	-0.817405	1.51928	9.16533e-46	4.37439e-44	93.0442
St3gal5	-0.8222	1.64576	8.4326e-32	2.27516e-30	61.1045
Vcp	-0.825788	3.43912	1.06967e-63	1.05002e-61	134.127
Zbtb8os	-0.830192	1.30752	3.68137e-42	1.53014e-40	84.7952
Lrrc8c	-0.832116	1.65809	6.29872e-47	3.1702e-45	95.7066
Cat	-0.836764	1.51231	5.55981e-43	2.41992e-41	86.674
Nme1	-0.838554	1.86098	2.96339e-40	1.13619e-38	80.4344
Map1b	-0.83881	1.57231	9.95901e-38	3.51639e-36	74.6551
Vipr2	-0.839402	0.799953	2.95425e-57	2.23441e-55	119.365
Tnc	-0.839771	0.998338	1.16111e-36	3.8725e-35	72.2157
Atp6v1e1	-0.839922	2.51345	2.10108e-58	1.68099e-56	121.996
Klhl2	-0.840035	1.1546	8.52823e-48	4.48819e-46	97.695
Rab11a	-0.840851	2.67536	1.41643e-53	9.20411e-52	110.932
Glrx3	-0.842007	2.12628	3.25822e-43	1.43165e-41	87.2052
Sgk1	-0.847285	2.78672	3.96295e-36	1.28759e-34	70.9966
Fuca2	-0.847808	1.27317	2.08173e-48	1.12114e-46	99.0974
Tmem50a	-0.848771	1.91852	2.59198e-53	1.65326e-51	110.331
Dhcr24	-0.850141	3.0467	9.1504e-47	4.55578e-45	95.3353
Igf2r	-0.853991	1.25893	1.12988e-47	5.90138e-46	97.4153
Smpdl3a	-0.854278	1.24927	2.30099e-47	1.17088e-45	96.708
LOC681458	-0.854549	0.847779	8.51215e-42	3.45504e-40	83.9621
Gulp1	-0.862672	1.18259	3.23506e-48	1.72217e-46	98.659
Nfs1	-0.865525	1.69296	3.07353e-47	1.55827e-45	96.4201
Dpy19l1	-0.868422	1.20765	2.86235e-46	1.39499e-44	94.2013
Sec14l1	-0.869816	1.8989	1.22077e-44	5.72767e-43	90.47
Col20a1	-0.871488	1.13467	1.10637e-46	5.46901e-45	95.1465
RGD1305464	-0.871512	2.29946	5.0988e-53	3.20784e-51	109.658
RT1-A2	-0.872584	2.25659	1.68478e-28	3.8103e-27	53.5669
Cd81	-0.87402	3.49809	2.48412e-63	2.33896e-61	133.288
Vmp1	-0.874538	2.27548	1.894e-48	1.02803e-46	99.1914
Stat4	-0.875067	1.52478	2.32969e-42	9.83089e-41	85.2499
Acot9	-0.877007	1.23896	4.04954e-47	2.04561e-45	96.1459
Etfa	-0.880032	1.60708	1.59257e-49	8.88821e-48	101.654
Scarb1	-0.880398	7.05251	9.33514e-188	6.46039e-184	418.641
Tpd52	-0.880883	1.3582	3.12069e-49	1.72774e-47	100.985
Gpihbp1	-0.881118	0.809331	1.4316e-57	1.09474e-55	120.086
Scd2	-0.88128	4.45705	3.05034e-66	3.35078e-64	139.96
Farp2	-0.881666	1.12142	2.51237e-44	1.163e-42	89.7525
Serinc3	-0.88366	2.12471	1.16188e-53	7.65793e-52	111.129
Enah	-0.884313	0.936948	3.03945e-57	2.28636e-55	119.337
Ndufs5	-0.884614	2.89867	1.69522e-68	1.97173e-66	145.13
Phka1	-0.887908	1.01102	1.4628e-52	8.99847e-51	108.61
Arsb	-0.889461	1.77086	2.02217e-50	1.1662e-48	103.707
Tbc1d14	-0.890929	1.15939	2.17595e-53	1.39432e-51	110.505
Ctnnbl1	-0.891437	1.13661	7.89947e-53	4.90298e-51	109.223
LOC100911664	-0.891722	3.08766	1.54521e-74	2.16033e-72	158.978
Taldo1	-0.892547	2.47944	9.79394e-52	5.86831e-50	106.718
Dusp14	-0.893983	1.61156	6.3083e-52	3.8128e-50	107.156
Ccng1	-0.896221	1.34581	1.37436e-47	7.09797e-46	97.2205
Fam167b	-0.898902	0.995675	2.04009e-52	1.24942e-50	108.279
Vps33a	-0.899775	1.00565	1.1521e-56	8.57327e-55	118.011
Hadha	-0.900013	3.04642	3.84968e-68	4.40359e-66	144.313
Fkbp1a	-0.902902	3.39789	1.68149e-72	2.19562e-70	154.308
Glrx5	-0.903565	2.19621	9.63474e-51	5.62677e-49	104.444
Pgrmc1	-0.904753	3.62041	2.16897e-105	9.68412e-103	229.74
Lsm1	-0.909395	1.72413	1.46596e-51	8.70831e-50	106.317
RGD1562987	-0.91037	1.86891	1.30701e-60	1.10984e-58	127.052
Serf1	-0.911483	0.86081	5.86482e-67	6.54637e-65	141.602
Pla2g16	-0.914232	2.59414	8.05957e-62	7.10525e-60	129.825
Tcta	-0.914336	1.33129	6.3678e-47	3.19336e-45	95.6958
App	-0.915695	4.15565	5.81086e-120	4.46823e-117	263.167
Atp6v1g1	-0.916372	3.33422	3.34945e-75	4.93189e-73	160.501
Sat1	-0.916555	2.67961	4.05148e-50	2.31721e-48	103.015
Retsat	-0.918075	2.55671	6.03021e-58	4.689e-56	120.947
Ube2ql1	-0.920424	0.910588	2.74779e-53	1.7446e-51	110.273
Cox20	-0.921738	1.2535	7.61059e-54	5.06434e-52	111.55
Asah1	-0.92273	2.06469	3.65626e-52	2.22935e-50	107.698
Aco2	-0.926048	2.39859	7.66295e-63	7.11832e-61	132.167
Ftl1	-0.927119	5.32312	1.42714e-130	1.79573e-127	287.505
Ethe1	-0.927126	1.63365	4.10955e-48	2.17932e-46	98.421
Acsl1	-0.928985	1.03025	1.80612e-55	1.27543e-53	115.272
Akr1b7	-0.931285	0.884559	7.28821e-53	4.56004e-51	109.303
Rab3a	-0.9317	1.42966	2.32506e-48	1.24617e-46	98.9875
Cdk18	-0.932881	1.23965	5.73141e-48	3.0278e-46	98.0902
Scp2	-0.933163	2.99763	9.05237e-73	1.21644e-70	154.925
Ptgfr	-0.934853	0.836343	2.28702e-62	2.08254e-60	131.078
Vegfa	-0.938727	1.93269	1.87858e-53	1.20937e-51	110.651
Rcan1	-0.939774	1.81091	4.08908e-44	1.86789e-42	89.2683
Minos1	-0.939922	3.32179	3.80691e-79	6.12691e-77	169.546
Stom	-0.944141	2.904	6.53868e-55	4.48029e-53	113.992
Acads	-0.945054	1.82009	1.05135e-48	5.72904e-47	99.7768
Epdr1	-0.947149	1.14711	1.233e-55	8.75174e-54	115.652
Crabp2	-0.956062	2.23206	2.2021e-47	1.1247e-45	96.7517
Mrps12	-0.959909	2.04056	5.77604e-56	4.14229e-54	116.407
Sfrp4	-0.961692	1.35943	3.9334e-33	1.11562e-31	64.1463
S100a4	-0.961771	1.2036	1.13498e-51	6.77125e-50	106.571
Mocs2	-0.963297	1.45678	7.09696e-54	4.74536e-52	111.62
Reep5	-0.963447	3.47803	1.22173e-64	1.2343e-62	136.287
Xpnpep2	-0.967224	0.948148	2.87568e-66	3.18418e-64	140.019
Mrpl33	-0.970854	1.45984	3.20699e-58	2.53646e-56	121.575
Tef	-0.979302	1.72168	6.44903e-35	1.9748e-33	68.2268
Mgst1	-0.98255	2.9601	2.05054e-65	2.20011e-63	138.063
Tmem59	-0.99244	2.58358	1.27523e-67	1.44676e-65	143.121
Tob1	-0.993254	1.81361	4.08201e-55	2.83915e-53	114.461
Cib1	-0.993335	2.15771	4.62326e-56	3.35029e-54	116.628
Dusp1	-0.995506	1.82132	1.69702e-59	1.41497e-57	124.5
Pdlim4	-1.00019	2.07228	5.34e-51	3.13182e-49	105.031
Syt13	-1.00063	1.69871	7.38196e-55	5.03319e-53	113.872
Acp5	-1.00103	1.34985	3.36916e-58	2.64957e-56	121.526
Entpd5	-1.00154	1.44282	9.91307e-63	9.14712e-61	131.91
Gch1	-1.00194	1.19011	5.96503e-63	5.57851e-61	132.416
Gm2a	-1.00526	4.45913	3.74359e-75	5.3974e-73	160.39
Uqcrfs1	-1.00638	2.13898	2.06889e-67	2.32809e-65	142.639
Fam19a5	-1.01108	0.965785	3.98694e-58	3.11769e-56	121.358
Aldh1l1	-1.01314	0.88083	5.20504e-71	6.31956e-69	150.891
Copz2	-1.01501	1.47312	8.35149e-58	6.45771e-56	120.623
Pla2g1b	-1.01756	2.59336	2.16995e-31	5.70994e-30	60.1668
Dld	-1.02219	2.37684	1.43012e-72	1.88518e-70	154.47
Tmem86a	-1.02331	2.89188	1.5369e-56	1.13755e-54	117.724
Hsd17b7	-1.02335	1.9878	4.55177e-38	1.62793e-36	75.4328
Hadhb	-1.0259	2.33712	6.0313e-76	9.17355e-74	162.208
Abcb1b	-1.028	1.27981	1.45756e-53	9.42717e-52	110.904
Pgam1	-1.04506	4.2912	1.3369e-109	7.11693e-107	239.398
Sptlc1	-1.04583	1.88203	2.90536e-60	2.45202e-58	126.256
Slc25a39	-1.04586	2.29536	2.99121e-59	2.46437e-57	123.936
Suclg1	-1.04785	2.69686	7.45032e-72	9.54814e-70	152.826
Cd47	-1.04924	1.65457	1.11036e-58	8.9874e-57	122.631
Slc16a11	-1.0504	1.32997	1.85987e-63	1.77534e-61	133.576
Cmbl	-1.05057	1.14567	2.63938e-74	3.65317e-72	158.445
G6pd	-1.05095	2.16692	1.06385e-60	9.08932e-59	127.256
Gpr176	-1.05129	1.06379	2.6334e-69	3.11529e-67	146.984
Mxra8	-1.07673	1.99266	3.19402e-59	2.61588e-57	123.871
Gpx1	-1.0777	4.00077	5.34675e-66	5.82711e-64	139.401
Plpp1	-1.08158	1.05051	2.25939e-65	2.40555e-63	137.967
Atp6v0e1	-1.08679	3.23731	2.09132e-91	5.36037e-89	197.664
Tango2	-1.09279	1.41188	4.52342e-65	4.70741e-63	137.276
Mrap	-1.09648	3.99828	3.80375e-130	4.38731e-127	286.528
Snap91	-1.09921	1.02391	1.57756e-71	2.00321e-69	152.079
Mt1	-1.10133	5.60962	8.4732e-85	1.67539e-82	182.509
RT1-CE10	-1.10283	4.08459	1.84132e-86	3.7479e-84	186.323
Dbp	-1.104	2.57294	3.88425e-54	2.6098e-52	112.22
Ctsd	-1.11411	4.70671	4.50103e-91	1.11248e-88	196.9
Rhof	-1.11922	1.31324	1.15023e-63	1.12115e-61	134.054
LOC100910200	-1.12353	2.16325	1.14893e-79	1.87087e-77	170.739
Hpx	-1.12453	1.65329	8.71771e-61	7.49452e-59	127.455
S100b	-1.12701	1.36182	8.93554e-62	7.82765e-60	129.722
Srp14	-1.12819	2.49333	6.39866e-87	1.32185e-84	187.375
Smpd1	-1.14152	2.79618	9.87784e-83	1.79894e-80	177.769
Uqcrb	-1.14556	3.02998	1.23072e-85	2.46875e-83	184.43
Cd74	-1.14611	3.72894	3.98049e-71	4.9191e-69	151.158
Nudt4	-1.14627	3.10911	4.20095e-75	5.99436e-73	160.275
Mgst2	-1.14842	2.28142	1.67322e-63	1.60827e-61	133.681
Ggt1	-1.15237	1.29888	4.83573e-65	4.99487e-63	137.209
Aldh3b1	-1.1593	2.12649	1.99162e-64	1.99754e-62	135.8
Cyp11a1	-1.16077	7.3052	7.57001e-249	1.04777e-244	558.591
Hes6	-1.16434	2.09439	3.01904e-62	2.71341e-60	130.802
Acsl3	-1.17307	1.46054	1.11938e-68	1.31299e-66	145.543
Atp6ap2	-1.18481	1.95244	5.62543e-82	9.7327e-80	176.037
Iscu	-1.1862	3.02048	3.52622e-111	2.0336e-108	243.02
Cops9	-1.20237	3.92354	3.57289e-105	1.54539e-102	229.243
Cisd1	-1.21115	2.23693	1.18671e-75	1.76616e-73	161.534
Dhcr7	-1.21316	3.2638	2.63189e-96	7.28559e-94	208.903
Dnajc15	-1.21517	3.31203	1.8199e-103	7.19692e-101	225.327
Dlst	-1.21917	2.23521	5.81183e-82	9.93105e-80	176.004
Osgin1	-1.22892	3.45571	6.38741e-77	9.82313e-75	164.444
Emc4	-1.25043	2.52283	1.32304e-83	2.57918e-81	179.771
Plscr1	-1.25204	1.44626	1.77125e-71	2.22871e-69	151.964
Fuca1	-1.25356	4.65273	1.05907e-64	1.07784e-62	136.429
Calml3	-1.2615	1.55273	6.42332e-80	1.07115e-77	171.318
Gpc1	-1.26412	2.4856	5.03676e-73	6.83468e-71	155.509
Gstt1	-1.27398	3.28998	5.29916e-80	8.9446e-78	171.51
Hp	-1.27637	2.83626	3.39422e-42	1.41932e-40	84.8759
Ei24	-1.28372	1.65451	8.99384e-79	1.41459e-76	168.69
Gstt3	-1.2883	4.21542	4.42721e-90	1.0565e-87	194.623
Rln1	-1.29443	5.43455	1.58263e-40	6.08477e-39	81.0576
Cpt2	-1.30007	1.87794	2.42423e-82	4.30177e-80	176.875
Rpp25	-1.30714	1.77077	1.03013e-64	1.05615e-62	136.456
Acaa2	-1.3113	3.98497	2.1625e-120	1.76066e-117	264.152
Fdxr	-1.3114	4.58559	2.79714e-110	1.54861e-107	240.956
Lrp11	-1.31325	1.86156	1.14362e-72	1.522e-70	154.692
Sucla2	-1.31554	2.59921	3.36084e-77	5.22667e-75	165.084
Fam20a	-1.31741	1.25246	4.72328e-79	7.51436e-77	169.331
Ghitm	-1.33457	3.08211	1.57468e-111	9.90687e-109	243.823
Ptk2b	-1.33614	2.16616	4.59767e-82	8.05523e-80	176.237
Pgk1	-1.33974	3.73567	3.67416e-102	1.37443e-99	222.334
Klhdc8a	-1.36475	3.75299	4.24689e-102	1.54688e-99	222.189
Scgb1a1	-1.37038	3.00025	6.11502e-62	5.46052e-60	130.099
Prdx3	-1.37415	3.99985	2.03592e-153	5.63582e-150	339.905
Decr1	-1.37499	2.63424	7.58505e-105	3.08779e-102	228.493
Anxa5	-1.38057	4.71499	8.45041e-98	2.38698e-95	212.329
Prdx5	-1.40105	3.60738	4.81736e-113	3.1751e-110	247.297
Msrb1	-1.40653	2.47801	2.60096e-100	8.57141e-98	218.09
Ctsh	-1.40884	3.92487	3.33371e-106	1.5911e-103	231.606
Creg1	-1.42027	2.95988	1.56319e-88	3.43429e-86	191.073
Ppcdc	-1.42321	2.28606	5.51627e-83	1.01801e-80	178.349
Star	-1.42933	3.77293	2.87572e-133	3.98029e-130	293.689
Rhbg	-1.43038	3.33111	1.49271e-83	2.83023e-81	179.651
Plbd1	-1.43587	2.70654	1.10019e-101	3.80692e-99	221.241
Ostf1	-1.4435	2.47161	4.19979e-98	1.23679e-95	213.025
Lipg	-1.44978	3.35838	5.03598e-124	4.64686e-121	272.486
Cdkn2b	-1.45568	1.7067	2.1997e-71	2.74288e-69	151.748
Avpi1	-1.4622	3.33728	4.55758e-98	1.3142e-95	212.944
Vtcn1	-1.47659	1.60758	5.0656e-88	1.09552e-85	189.902
Ctsa	-1.4997	4.35732	1.50454e-88	3.35877e-86	191.111
Prss23	-1.49987	2.70343	8.42991e-75	1.1906e-72	159.582
Hsd3b3	-1.56976	2.15905	1.68219e-113	1.16416e-110	248.345
Sord	-1.59592	3.14617	8.61124e-90	2.02014e-87	193.96
Bcat1	-1.60308	2.96554	1.38698e-99	4.36298e-97	216.423
Rgcc	-1.62636	2.23104	4.60636e-89	1.06261e-86	192.29
Mfge8	-1.64759	5.72881	2.36147e-111	1.42109e-108	243.419
Idh1	-1.65023	4.35762	1.60573e-108	8.23144e-106	236.921
Sdc1	-1.72447	2.90869	1.79472e-100	6.05873e-98	218.46
Gadd45a	-1.72856	3.40482	3.70937e-105	1.5558e-102	229.206
Dmkn	-1.75817	2.87312	2.9395e-91	7.39738e-89	197.324
LOC108348086	-1.75864	2.07229	1.43387e-63	1.38785e-61	133.835
Dhfr	-1.78394	2.7992	6.40774e-106	2.95632e-103	230.955
Podnl1	-1.79274	2.35943	5.09311e-91	1.23673e-88	196.777
Fabp6	-1.7973	5.10736	3.69799e-116	2.69389e-113	254.442
Slc51a	-1.87096	2.49082	1.53653e-98	4.62328e-96	214.027
Akr1c3	-2.25423	6.39936	2.44554e-123	2.11554e-120	270.911

## Sheet: cluster3
Tag	logFC	AveExpr	P.Value	adj.P.Val	B
Akr1c3	2.77886	6.39936	2.2551e-223	3.12128e-219	500.385
Slc51a	2.37713	2.49082	1.00192e-184	6.93375e-181	411.774
Podnl1	2.33154	2.35943	1.08822e-179	5.02068e-176	400.223
LOC108348086	2.12874	2.07229	8.31892e-97	1.90381e-94	210.052
Dhfr	2.11695	2.7992	1.94944e-163	4.49704e-160	362.939
Scgb1a1	2.07966	3.00025	3.4672e-174	1.19974e-170	387.6
Gadd45a	2.04418	3.40482	2.08938e-160	3.61489e-157	355.988
Dmkn	2.01452	2.87312	5.13948e-125	2.84542e-122	274.782
Sord	1.96956	3.14617	6.1176e-151	8.46737e-148	334.268
Prss23	1.95909	2.70343	1.22644e-142	1.21251e-139	315.219
Sdc1	1.93037	2.90869	2.29325e-130	1.51147e-127	287.06
Cdkn2b	1.91355	1.7067	2.94579e-137	2.54829e-134	302.873
Vtcn1	1.87714	1.60758	9.53891e-161	1.88611e-157	356.769
Ctsa	1.84107	4.35732	3.04156e-146	3.82711e-143	323.493
Mfge8	1.8334	5.72881	1.93848e-143	2.06388e-140	317.058
Bcat1	1.8059	2.96554	2.26599e-131	1.65072e-128	289.367
Idh1	1.7721	4.35762	1.88836e-126	1.08903e-123	278.075
Rgcc	1.71215	2.23104	7.37511e-98	1.79086e-95	212.466
Sucla2	1.70176	2.59921	3.59404e-144	4.14542e-141	318.737
Ctsh	1.68664	3.92487	2.26252e-168	6.2631e-165	374.262
Anxa5	1.67852	4.71499	6.77819e-160	1.04241e-156	354.815
Rpp25	1.66356	1.77077	3.5636e-112	1.49466e-109	245.316
Ptk2b	1.6288	2.16616	2.74692e-131	1.901e-128	289.175
Ppcdc	1.61046	2.28606	4.20714e-109	1.5324e-106	238.266
Plbd1	1.60703	2.70654	5.14777e-132	3.95835e-129	290.844
Gpc1	1.5884	2.4856	1.30453e-124	6.94463e-122	273.854
Msrb1	1.58308	2.47801	4.257e-132	3.46595e-129	291.033
Fam20a	1.56708	1.25246	7.83845e-118	3.6164e-115	258.299
Creg1	1.54171	2.95988	4.6055e-105	1.41655e-102	228.998
Avpi1	1.52551	3.33728	1.45233e-105	4.56856e-103	230.148
Lipg	1.49584	3.35838	3.02093e-130	1.90058e-127	286.786
Nudt4	1.47464	3.10911	2.40322e-137	2.21753e-134	303.076
Ei24	1.46986	1.65451	2.58218e-106	8.31161e-104	231.869
Emc4	1.46917	2.52283	2.25713e-121	1.07727e-118	266.424
Pgk1	1.45723	3.73567	8.37594e-123	4.14041e-120	269.706
Hsd3b3	1.44052	2.15905	1.78099e-88	3.47193e-86	190.938
Cpt2	1.43641	1.87794	8.19598e-102	2.26881e-99	221.539
Ostf1	1.42933	2.47161	1.17833e-92	2.39842e-90	200.527
Hpx	1.42906	1.65329	4.50293e-104	1.32607e-101	226.725
Osgin1	1.41139	3.45571	2.02095e-104	6.08088e-102	227.524
Prdx5	1.40766	3.60738	1.38904e-110	5.49307e-108	241.665
Ggt1	1.40464	1.29888	4.95851e-101	1.29492e-98	219.746
Gstt3	1.40055	4.21542	2.12385e-107	7.1698e-105	234.358
S100b	1.39434	1.36182	4.74986e-99	1.19532e-96	215.199
Dlst	1.38842	2.23521	1.9346e-109	7.23696e-107	239.041
Klhdc8a	1.38437	3.75299	2.23182e-102	6.30422e-100	222.836
Mxra8	1.37876	1.99266	5.18177e-103	1.49418e-100	224.291
Tef	1.37438	1.72168	7.02343e-71	8.23824e-69	150.576
Lrp11	1.35122	1.86156	2.60515e-75	3.43408e-73	160.738
Rhbg	1.34193	3.33111	1.00411e-69	1.13918e-67	147.927
Cisd1	1.33702	2.23693	6.34476e-93	1.31071e-90	201.144
Dbp	1.32645	2.57294	7.88175e-80	1.14833e-77	171.104
Rhof	1.32512	1.31324	8.29205e-92	1.66334e-89	198.583
Gstt1	1.31368	3.28998	2.07362e-83	3.33732e-81	179.316
Aldh1l1	1.30469	0.88083	6.80956e-129	4.09788e-126	283.681
Fabp6	1.30016	5.10736	2.73673e-52	1.57175e-50	107.959
Stom	1.30007	2.904	9.51928e-114	4.11738e-111	248.926
Fam19a5	1.2994	0.965785	8.75725e-102	2.37665e-99	221.473
G6pd	1.29823	2.16692	9.18534e-97	2.05055e-94	209.953
Smpd1	1.28876	2.79618	4.1558e-108	1.47488e-105	235.984
Plscr1	1.28788	1.44626	5.0965e-74	6.41278e-72	157.776
Atp6ap2	1.27466	1.95244	8.14134e-95	1.7336e-92	205.484
Rcan1	1.2716	1.81091	1.37719e-84	2.24255e-82	182.018
Hes6	1.26638	2.09439	3.31615e-73	4.09811e-71	155.91
Fdxr	1.26262	4.58559	6.95308e-97	1.63115e-94	210.23
Decr1	1.26162	2.63424	4.00823e-82	6.3043e-80	176.365
Ube2ql1	1.25792	0.910588	1.08687e-107	3.76084e-105	235.026
Gm2a	1.24637	4.45913	2.92734e-124	1.50064e-121	273.049
Star	1.23484	3.77293	2.14045e-88	4.11473e-86	190.755
Pdlim4	1.22879	2.07228	6.85539e-79	9.782e-77	168.949
Acsl3	1.22332	1.46054	2.11674e-73	2.63944e-71	156.358
Gpr176	1.22124	1.06379	5.10545e-96	1.12166e-93	208.244
Gpx1	1.22071	4.00077	1.12664e-85	1.9739e-83	184.512
Cdk18	1.21549	1.23965	7.51299e-85	1.23794e-82	182.622
Farp2	1.20953	1.12142	6.31752e-88	1.19782e-85	189.677
Ethe1	1.20856	1.63365	3.12859e-85	5.34602e-83	183.494
Ctsd	1.202	4.70671	1.52959e-106	5.04073e-104	232.391
Mgst2	1.1976	2.28142	8.47279e-68	8.88423e-66	143.51
Atp6v0e1	1.19372	3.23731	5.26277e-112	2.14241e-109	244.927
Copz2	1.18654	1.47312	2.99228e-80	4.40597e-78	172.069
Ghitm	1.16452	3.08211	3.53525e-77	4.89314e-75	165.021
Tango2	1.16397	1.41188	5.5434e-73	6.78993e-71	155.399
Ptgfr	1.16339	0.836343	1.36734e-101	3.63948e-99	221.029
Cops9	1.15994	3.92354	5.25767e-93	1.1026e-90	201.331
Lsm1	1.15894	1.72413	3.67282e-87	6.86967e-85	187.923
Reep5	1.15763	3.47803	8.39046e-97	1.90381e-94	210.043
Vmp1	1.15715	2.27548	4.62096e-89	9.13696e-87	192.283
Uqcrb	1.1565	3.02998	7.0193e-85	1.17053e-82	182.689
St3gal5	1.15208	1.64576	1.24421e-63	1.06303e-61	133.956
Acaa2	1.14598	3.98497	5.21116e-83	8.29054e-81	178.398
Cd74	1.14232	3.72894	1.79357e-68	1.97022e-66	145.056
Acsl1	1.14157	1.03025	1.67082e-86	3.04287e-84	186.413
Dnajc15	1.13677	3.31203	5.92807e-85	1.00061e-82	182.858
Ahnak	1.13519	2.79115	7.20691e-87	1.33001e-84	187.251
Cd47	1.12915	1.65457	3.14497e-67	3.17734e-65	142.204
Slc25a39	1.12895	2.29536	2.24349e-68	2.44506e-66	144.833
Cib1	1.12858	2.15771	1.16681e-72	1.41665e-70	154.657
Sptlc1	1.11253	1.88203	2.80558e-67	2.85529e-65	142.317
Aldh3b1	1.10682	2.12649	2.2161e-56	1.49625e-54	117.335
Sod3	1.10566	1.93455	2.28146e-69	2.56729e-67	147.109
Gch1	1.10181	1.19011	5.40431e-76	7.26224e-74	162.305
S100a4	1.09933	1.2036	1.23768e-67	1.28606e-65	143.132
Mrpl33	1.09862	1.45984	6.75191e-75	8.73395e-73	159.789
Tcirg1	1.09665	1.69813	1.06019e-66	1.02616e-64	140.993
Cpe	1.0954	0.98941	2.09687e-57	1.48835e-55	119.682
Epdr1	1.09147	1.14711	1.6897e-74	2.16547e-72	158.876
Tob1	1.086	1.81361	2.34869e-65	2.16445e-63	137.908
Neurl2	1.08555	0.662723	4.43134e-99	1.13582e-96	215.268
Map1b	1.08021	1.57231	2.03949e-63	1.72126e-61	133.464
Mocs2	1.07238	1.45678	1.65083e-66	1.58675e-64	140.552
Phka1	1.07154	1.01102	3.86013e-78	5.45184e-76	167.227
Cd81	1.06101	3.49809	4.22891e-97	1.00918e-94	210.726
AC133739.1	1.06046	0.74965	4.99749e-98	1.23518e-95	212.854
Tcta	1.0545	1.33129	2.19618e-62	1.75707e-60	131.097
Snap91	1.05029	1.02391	1.51988e-62	1.23021e-60	131.464
Srp14	1.04887	2.49333	6.4744e-71	7.65916e-69	150.657
Dag1	1.04772	3.24664	1.15516e-77	1.61501e-75	166.135
Acot9	1.04718	1.23896	8.31614e-68	8.78655e-66	143.528
Akr1b7	1.0396	0.884559	1.27068e-65	1.19643e-63	138.52
Suclg1	1.0388	2.69686	2.54943e-68	2.75677e-66	144.706
Enah	1.03868	0.936948	2.55832e-80	3.8075e-78	172.225
Pacsin2	1.02055	1.48322	4.60846e-61	3.60371e-59	128.067
Rab11a	1.01966	2.67536	1.09236e-80	1.66147e-78	173.073
Taldo1	1.0157	2.47944	4.8654e-67	4.84475e-65	141.769
Sat1	1.00966	2.67961	2.9084e-60	2.21182e-58	126.233
Slc16a11	1.00931	1.32997	2.3972e-56	1.61066e-54	117.257
Pomgnt1	1.0074	1.41411	3.97709e-69	4.43926e-67	146.556
Gulp1	1.00409	1.18259	1.52369e-65	1.42496e-63	138.339
Stat4	0.997801	1.52478	1.16627e-54	7.37094e-53	113.391
Ccng1	0.992101	1.34581	9.40286e-58	6.74326e-56	120.48
Dusp14	0.986124	1.61156	1.06801e-62	8.6955e-61	131.815
Aco1	0.985804	1.13957	7.3721e-68	7.84901e-66	143.648
Dhcr7	0.984625	3.2638	2.57804e-57	1.82055e-55	119.476
Tbc1d14	0.980529	1.15939	3.41924e-64	2.95785e-62	135.242
Fuca1	0.980032	4.65273	6.82697e-37	2.17223e-35	72.707
LOC681458	0.979786	0.847779	1.46054e-54	9.18877e-53	113.167
Sec14l1	0.978677	1.8989	4.81145e-56	3.17121e-54	116.563
Dld	0.97338	2.37684	6.02782e-63	4.99587e-61	132.385
Nme1	0.972119	1.86098	9.39256e-54	5.65228e-52	111.314
Hadhb	0.971384	2.33712	6.04888e-65	5.47207e-63	136.966
Tmem147	0.966356	2.23789	4.98931e-55	3.16775e-53	114.236
Itgb1bp1	0.966053	1.12649	1.44779e-71	1.72749e-69	152.149
Ctnnbl1	0.965966	1.13661	2.60282e-61	2.04691e-59	128.636
Dusp1	0.963351	1.82132	9.98846e-54	5.98486e-52	111.253
Ltn1	0.96174	1.17964	1.54204e-63	1.30941e-61	133.742
Pgam1	0.961249	4.2912	4.09803e-86	7.36634e-84	185.52
RT1-CE10	0.960664	4.08459	7.75266e-61	5.99467e-59	127.549
Itgae	0.959889	1.10567	2.36133e-65	2.16445e-63	137.903
Slc6a8	0.959138	1.30792	1.75305e-65	1.62846e-63	138.2
Chst12	0.958846	0.730637	2.21416e-81	3.44338e-79	174.663
Col20a1	0.957513	1.13467	1.09546e-55	7.15203e-54	115.745
Cat	0.95526	1.51231	1.21694e-55	7.90785e-54	115.64
Sbsn	0.955076	0.874853	1.25227e-64	1.10399e-62	136.242
Entpd5	0.952774	1.44282	1.69484e-54	1.05668e-52	113.019
Mtap	0.950493	0.914723	1.84046e-70	2.12282e-68	149.617
AC134224.3	0.949555	3.65994	5.97714e-36	1.82224e-34	70.5519
Acss1	0.947687	1.01505	4.29768e-67	4.31045e-65	141.893
Cox20	0.947031	1.2535	1.61768e-55	1.04141e-53	115.357
Nit1	0.946773	1.97476	1.2149e-57	8.66773e-56	120.225
Pla2g16	0.945945	2.59414	8.17596e-65	7.30087e-63	136.666
Ypel5	0.941341	1.88505	2.61999e-56	1.75185e-54	117.168
Klhl2	0.936588	1.1546	6.02662e-59	4.43694e-57	123.215
Acot7	0.936388	1.17306	6.92494e-61	5.38472e-59	127.661
Mgst1	0.934643	2.9601	9.23455e-57	6.35898e-55	118.206
Igf2r	0.93122	1.25893	5.86891e-56	3.84983e-54	116.366
RGD1305464	0.926748	2.29946	5.41347e-59	4.00684e-57	123.322
Tpd52	0.926352	1.3582	2.19367e-53	1.30311e-51	110.47
Dpy19l1	0.924	1.20765	1.99149e-51	1.10257e-49	105.984
Atp6v1g1	0.922765	3.33422	4.10756e-74	5.21585e-72	157.991
Slc35f6	0.921796	1.30065	1.2509e-53	7.46279e-52	111.029
Syt13	0.920669	1.69871	1.66863e-44	7.17252e-43	90.1274
Vps33a	0.915889	1.00565	3.05586e-57	2.14702e-55	119.307
Serf1	0.913329	0.86081	2.83096e-65	2.57785e-63	137.722
Zbtb8os	0.910704	1.30752	5.57362e-50	2.94445e-48	102.669
Scd2	0.909415	4.45705	4.55777e-69	5.04672e-67	146.42
Rangap1	0.908015	1.86932	1.50696e-48	7.61233e-47	99.3891
Cald1	0.907785	2.28736	5.62004e-64	4.83148e-62	134.747
Aco2	0.905824	2.39859	4.60265e-58	3.33535e-56	121.191
Rab3a	0.903984	1.42966	4.62403e-44	1.93943e-42	89.1139
Asah1	0.90237	2.06469	2.73137e-48	1.36974e-46	98.7975
Serinc3	0.902032	2.12471	1.5348e-54	9.61231e-53	113.117
Vegfa	0.897654	1.93269	3.95556e-47	1.86856e-45	96.1388
Clip1	0.897578	1.05885	1.3629e-51	7.69952e-50	106.361
Sgcg	0.895694	0.618327	3.71874e-79	5.36158e-77	169.558
Plpp1	0.895638	1.05051	5.10034e-42	2.02856e-40	84.4379
Ftl1	0.895506	5.32312	6.91667e-115	3.08818e-112	251.539
Arl5a	0.894365	0.828578	1.57991e-64	1.38402e-62	136.01
Glrx3	0.894325	2.12628	8.51845e-48	4.22594e-46	97.6661
Serpinb6a	0.893487	2.10053	2.66007e-59	1.99016e-57	124.029
Aifm2	0.885215	1.07983	8.22349e-57	5.71967e-55	118.322
Cmbl	0.882273	1.14567	9.08537e-49	4.65743e-47	99.8925
Mrps23	0.881916	1.9764	3.74034e-53	2.20298e-51	109.939
Mrps12	0.881868	2.04056	3.16752e-45	1.4097e-43	91.7797
Gtf2b	0.881067	1.19929	6.81673e-53	3.99789e-51	109.342
Tmem59	0.879439	2.58358	3.72203e-50	1.98906e-48	103.071
Laptm4b	0.878045	2.99016	3.58073e-72	4.30964e-70	153.54
Prdx3	0.877389	3.99985	1.24587e-49	6.55668e-48	101.869
Etfa	0.874888	1.60708	1.58608e-47	7.62253e-46	97.0478
Parp3	0.873083	0.782157	5.93674e-62	4.69546e-60	130.107
Maged2	0.872999	2.4206	7.18094e-57	5.01977e-55	118.457
Uqcrfs1	0.871659	2.13898	1.34705e-47	6.56496e-46	97.2103
Fkbp1a	0.87069	3.39789	1.04406e-64	9.26332e-63	136.423
Chn2	0.870298	0.683184	7.82321e-67	7.67951e-65	141.296
Nfe2l1	0.868444	0.780545	3.15768e-64	2.74877e-62	135.321
Myl12a	0.867184	3.24636	3.84218e-77	5.26531e-75	164.938
Calml3	0.865846	1.55273	5.02993e-34	1.38684e-32	66.15
Acads	0.865257	1.82009	2.9985e-39	1.05336e-37	78.1001
Ndufs5	0.863493	2.89867	6.5383e-63	5.3867e-61	132.304
Carhsp1	0.862284	1.74373	1.04447e-47	5.16302e-46	97.4633
Pnpla8	0.862208	1.39304	4.56219e-45	2.00461e-43	91.4169
Hmox1	0.860957	1.4599	1.72622e-50	9.29672e-49	103.835
Fam91a1	0.86041	1.99036	3.36758e-50	1.80662e-48	103.171
Sgk1	0.854535	2.78672	8.8275e-36	2.67942e-34	70.1646
Ndufa12	0.853725	2.67978	1.65168e-62	1.32912e-60	131.381
Cemip	0.851799	0.730122	3.61185e-60	2.73178e-58	126.017
Nfs1	0.84997	1.69296	3.57485e-44	1.51314e-42	89.3698
Lrrc8c	0.848543	1.65809	1.42022e-47	6.84923e-46	97.1576
RGD1562987	0.846484	1.86891	3.88279e-50	2.06699e-48	103.029
Arl6ip5	0.84577	1.06674	1.42994e-51	8.04546e-50	106.314
Greb1	0.842285	1.90659	3.23804e-41	1.25189e-39	82.6006
Atp5f1c	0.841231	2.4579	1.39723e-48	7.0839e-47	99.4643
Herpud1	0.840132	3.16175	3.72815e-62	2.96559e-60	130.57
Mrap	0.837189	3.99828	7.89507e-65	7.09582e-63	136.701
Sqstm1	0.836657	3.21962	1.21279e-70	1.4106e-68	150.032
Wwc3	0.83188	0.910881	2.03318e-54	1.25631e-52	112.837
Glod4	0.828629	1.29429	8.4999e-44	3.53295e-42	88.5085
Plekhb2	0.826922	1.81779	8.51785e-49	4.38273e-47	99.9566
Rheb	0.823513	1.91718	1.93675e-51	1.07657e-49	106.012
Itfg1	0.823094	1.82035	8.68046e-47	4.07275e-45	95.3571
Tmem86a	0.821225	2.89188	2.17415e-34	6.17914e-33	66.9829
Slc22a17	0.820713	2.05604	3.40142e-41	1.3114e-39	82.5517
Mt1	0.820621	5.60962	1.55683e-42	6.31908e-41	85.6176
Chp1	0.818651	1.41106	7.99708e-44	3.33396e-42	88.5692
Ndfip1	0.818379	3.26836	2.36909e-58	1.72582e-56	121.852
Mindy1	0.816235	1.08001	3.84891e-45	1.702e-43	91.586
Hadha	0.813589	3.04642	9.0862e-53	5.26201e-51	109.056
Vcp	0.810531	3.43912	2.70143e-59	2.01024e-57	124.014
Rgl1	0.810362	1.23807	2.6199e-44	1.11442e-42	89.6788
Plp2	0.807763	1.16413	1.191e-47	5.84563e-46	97.3327
Minos1	0.805223	3.32179	5.28498e-54	3.20831e-52	111.887
Txn2	0.802507	2.03056	8.32231e-51	4.51722e-49	104.561
Scp2	0.796553	2.99763	1.50277e-49	7.87875e-48	101.682
Ngly1	0.792397	0.82833	2.95711e-52	1.6913e-50	107.882
Pink1	0.789947	1.31206	1.39223e-40	5.25065e-39	81.1509
Hbs1l	0.788256	1.2679	1.17526e-39	4.19246e-38	79.0309
Trappc6a	0.787452	1.85597	3.3041e-38	1.11e-36	75.7156
Nf2	0.787413	1.21348	8.60786e-43	3.51449e-41	86.2067
Ttc39a	0.787222	0.766554	2.99999e-45	1.34378e-43	91.8338
Iscu	0.786047	3.02048	9.04879e-42	3.55808e-40	83.8679
LOC100911664	0.785069	3.08766	3.23824e-54	1.98321e-52	112.374
Ap2s1	0.785013	2.33338	5.46053e-45	2.39175e-43	91.2382
Parp9	0.781177	1.80628	3.89302e-45	1.71603e-43	91.5746
Acp5	0.780538	1.34985	2.72153e-33	7.24397e-32	64.4738
Acadvl	0.779805	1.77958	3.04087e-40	1.1018e-38	80.3744
Got2	0.779367	2.29248	4.34803e-44	1.82921e-42	89.1751
Atp6v1e1	0.777977	2.51345	5.74282e-48	2.85922e-46	98.0583
RT1-A2	0.777468	2.25659	4.291e-22	6.53374e-21	38.9156
Babam2	0.775781	1.349	5.8361e-39	2.02958e-37	77.4383
Vapa	0.774391	3.37227	5.49917e-75	7.18057e-73	159.994
Scd	0.77377	0.517462	1.32396e-67	1.3574e-65	143.065
Tmem50a	0.773714	1.91852	1.91817e-42	7.74036e-41	85.4101
Efnb1	0.773407	1.25752	1.67413e-38	5.66542e-37	76.3912
Hmbs	0.772491	1.10126	6.77738e-39	2.35102e-37	77.2897
Runx2	0.767929	1.07932	1.36139e-39	4.84395e-38	78.8847
Tax1bp3	0.767815	1.94851	1.46011e-45	6.62604e-44	92.5499
Nudt7	0.766711	0.662033	5.90666e-58	4.25803e-56	120.943
Tom1l1	0.766416	0.637701	2.91674e-56	1.94089e-54	117.062
Grpel1	0.765682	2.25784	1.87885e-47	8.99832e-46	96.8793
Ccnk	0.764878	0.934546	1.11814e-46	5.22845e-45	95.1053
Apmap	0.764273	1.19147	1.60228e-38	5.43559e-37	76.4347
Map7d1	0.764182	1.53291	1.76362e-36	5.46091e-35	71.7643
Ywhag	0.764091	2.63566	1.0051e-48	5.1334e-47	99.792
Mtus1	0.763167	0.973601	2.26456e-40	8.29201e-39	80.6674
Cdhr5	0.762995	0.65465	1.80836e-54	1.1224e-52	112.954
Wdr45	0.757872	0.89088	1.09368e-45	4.97948e-44	92.8373
Farp1	0.757355	1.04486	3.6164e-40	1.30691e-38	80.2022
Pdlim1	0.755368	1.117	9.77136e-39	3.34766e-37	76.9262
Cox17	0.754541	2.52486	2.01376e-49	1.04391e-47	101.391
Anxa7	0.752801	1.32303	7.10585e-37	2.25578e-35	72.6673
Ufc1	0.750888	2.23036	3.02378e-41	1.17233e-39	82.6687
Slc39a13	0.748843	0.731093	4.0873e-51	2.23606e-49	105.269
Bscl2	0.748815	1.17222	7.50809e-42	2.96067e-40	84.0535
Rln1	0.747883	5.43455	1.81927e-13	1.49528e-12	19.3217
Glrx5	0.746886	2.19621	5.01379e-33	1.32183e-31	63.8672
Itpr1	0.745576	1.09719	2.85194e-41	1.11194e-39	82.7268
Polr3g	0.745051	0.553602	9.6732e-61	7.43815e-59	127.329
Glb1	0.74437	1.41905	2.04951e-34	5.83689e-33	67.0415
AABR07044711.1	0.743246	3.21849	5.51046e-45	2.406e-43	91.2291
Clec2g	0.742621	1.62605	2.30269e-34	6.5177e-33	66.9258
Opa1	0.741594	0.752706	1.61072e-48	8.10689e-47	99.3229
Esrra	0.736979	1.11436	2.41336e-38	8.14713e-37	76.0278
Taf13	0.736977	0.88926	3.44667e-43	1.4198e-41	87.1166
Zbed5	0.736698	2.60665	1.48283e-51	8.27574e-50	106.278
Map1a	0.736172	0.591455	1.74468e-55	1.11797e-53	115.281
Etfdh	0.735521	1.14296	1.27401e-37	4.13934e-36	74.3747
Pnp	0.734704	0.922855	2.09753e-37	6.78316e-36	73.8794
Ext1	0.734139	1.16053	7.41224e-37	2.34766e-35	72.6253
Rogdi	0.734105	1.50819	1.25698e-31	3.08474e-30	60.6696
Tpst2	0.73269	0.853533	9.43139e-46	4.30825e-44	92.9845
Nr1d1	0.731612	1.03664	1.98314e-40	7.33356e-39	80.7993
Mpc2	0.731069	0.834642	6.41187e-42	2.54288e-40	84.2104
Atp5f1a	0.730751	3.26995	1.89146e-45	8.52759e-44	92.2925
Heatr5b	0.730462	0.819057	3.58774e-45	1.5916e-43	91.6559
Fam53b	0.730078	0.774886	6.43919e-45	2.80267e-43	91.0742
Sfrp4	0.728786	1.35943	1.18076e-18	1.4618e-17	31.0881
Tspan12	0.728781	0.722114	1.25998e-47	6.16232e-46	97.2767
Ctsb	0.726463	4.43173	5.62188e-81	8.64583e-79	173.734
Uhrf1bp1l	0.725759	1.56278	8.31285e-40	2.98078e-38	79.375
Lamp2	0.724559	2.23602	4.73269e-38	1.58225e-36	75.3586
Impdh1	0.723602	1.60935	1.20447e-34	3.48038e-33	67.5693
Mob4	0.722169	2.61569	1.4052e-47	6.80047e-46	97.1682
Retsat	0.722152	2.55671	9.25913e-34	2.53272e-32	65.5442
Zfp706	0.72213	2.33444	1.59443e-43	6.60735e-42	87.8831
Psmb7	0.721848	2.5992	1.74069e-44	7.4591e-43	90.0853
AABR07026294.1	0.721739	1.51928	2.79458e-34	7.82993e-33	66.7336
Ndufv3	0.720573	1.64731	5.4906e-36	1.6776e-34	70.6362
Acad10	0.719237	1.044	4.44069e-39	1.55604e-37	77.7098
Gnpat	0.719206	1.01753	9.18386e-39	3.16992e-37	76.9878
Tmem30a	0.717201	1.31149	1.27465e-35	3.86048e-34	69.7997
Eps15l1	0.716828	0.770131	1.55976e-46	7.2445e-45	94.7742
Fuca2	0.715924	1.27317	5.30408e-33	1.3957e-31	63.8114
Fam102a	0.715726	0.972855	4.50182e-41	1.71652e-39	82.2731
Dtx3l	0.715495	2.60643	1.39219e-44	6.0029e-43	90.3075
Snapin	0.715316	1.6311	5.96086e-38	1.98327e-36	75.1294
LOC100910200	0.713875	2.16325	5.32431e-29	1.15327e-27	54.6687
Uqcr10	0.713641	3.7792	5.90436e-66	5.59741e-64	139.283
Srp68	0.712624	1.4789	1.32786e-34	3.82098e-33	67.4725
Cox14	0.712567	0.890482	1.98691e-40	7.33356e-39	80.7974
Rab5if	0.712053	2.67158	1.96831e-49	1.02419e-47	101.414
Xpnpep2	0.711382	0.948148	3.09018e-33	8.19371e-32	64.3477
Pmpca	0.710946	1.37323	2.67868e-32	6.76562e-31	62.2039
Prdx6	0.710888	3.09436	2.35571e-51	1.29902e-49	105.817
Ets2	0.710815	0.975257	7.80539e-37	2.46654e-35	72.574
Dnajb1	0.70963	1.99478	2.89434e-41	1.12529e-39	82.7122
Pnpo	0.709457	1.15822	1.89213e-33	5.10506e-32	64.8346
Ubc	0.709399	4.79576	8.51367e-96	1.84121e-93	207.734
LOC294154	0.709253	1.75605	2.53971e-32	6.43811e-31	62.2568
Arsb	0.709126	1.77086	1.6907e-30	3.8872e-29	58.0907
Tns4	0.707471	0.80747	4.64663e-37	1.48875e-35	73.0892
Fech	0.706736	1.08422	2.4756e-34	6.96438e-33	66.8539
Atp5if1	0.705912	3.23499	3.56812e-47	1.69131e-45	96.2413
Sh3glb1	0.705829	1.23903	3.39575e-37	1.09304e-35	73.4008
Cltc	0.705721	2.74537	1.20383e-46	5.61018e-45	95.0318
Tuba1c	0.703987	2.3079	7.70551e-43	3.16377e-41	86.3168
Pmm2	0.703334	0.908178	8.50233e-41	3.21532e-39	81.6411
Mrpl18	0.703245	1.02611	2.1484e-37	6.93148e-36	73.8556
Colec12	0.702376	0.931348	1.82475e-29	4.02171e-28	55.7308
Emc7	0.70212	1.6991	1.03818e-37	3.38902e-36	74.5781
Tmem14c	0.701416	1.12996	1.58225e-36	4.92134e-35	71.8721
Vipr2	0.701057	0.799953	8.54398e-38	2.82912e-36	74.7717
Lonp1	0.699476	2.22097	7.87664e-35	2.29517e-33	67.9911
Bnip3	0.696451	0.928506	3.8405e-38	1.28708e-36	75.5662
Atp6ap1	0.695957	1.77387	1.47135e-35	4.43681e-34	69.6572
Rab2a	0.694946	0.699605	2.39064e-46	1.10665e-44	94.3495
Psmc1	0.694511	2.44224	4.43648e-41	1.69628e-39	82.2876
Ndrg2	0.694032	1.59826	1.49316e-34	4.27885e-33	67.356
Hsd17b8	0.693431	1.46056	3.12611e-32	7.85272e-31	62.0506
Cyp46a1	0.692839	0.52825	2.15628e-54	1.32645e-52	112.779
Car5b	0.692807	0.396699	3.6755e-68	3.94362e-66	144.341
Ide	0.691704	1.28363	1.27617e-32	3.29544e-31	62.9398
Ctps1	0.690151	1.8049	2.64564e-35	7.85802e-34	69.0745
Fmo1	0.689267	0.457759	3.10242e-53	1.83507e-51	110.125
Tmco4	0.689022	0.650088	1.08693e-47	5.35382e-46	97.4237
Phlda3	0.688614	1.20984	5.874e-31	1.38741e-29	59.1396
Park7	0.68803	3.19904	2.89435e-47	1.37665e-45	96.4495
Mtss1	0.687366	0.842199	7.68246e-39	2.65832e-37	77.1652
Akip1	0.687167	0.92361	1.01622e-37	3.33305e-36	74.5994
Gpihbp1	0.687146	0.809331	5.69144e-33	1.48633e-31	63.7414
Smap1	0.684598	1.14242	2.79254e-34	7.82993e-33	66.7343
Anxa4	0.682695	1.15001	1.01604e-33	2.76287e-32	65.452
Gk	0.682189	0.599457	1.06332e-50	5.74897e-49	104.317
Lancl1	0.68177	0.820083	2.77462e-40	1.01062e-38	80.4655
Cilp2	0.681687	0.570533	6.90093e-51	3.76047e-49	104.748
Rhbdl2	0.681441	0.46823	8.41481e-57	5.82347e-55	118.299
Rnf10	0.680061	1.9194	2.59313e-32	6.56152e-31	62.2361
Tst	0.67897	2.70636	9.70662e-39	3.33373e-37	76.9328
Rex1bd	0.678789	1.75679	1.4477e-34	4.15719e-33	67.3867
Naxe	0.678037	1.45017	1.50726e-32	3.86332e-31	62.7747
Capzb	0.677656	2.04139	3.97878e-32	9.88696e-31	61.8112
Rad23b	0.677068	1.77191	8.21417e-36	2.49873e-34	70.2361
Fkbp8	0.676801	2.76464	2.07235e-40	7.62857e-39	80.7556
Abcb1b	0.676056	1.27981	5.59013e-22	8.44684e-21	38.6539
Htatip2	0.675699	1.21388	9.33316e-30	2.0802e-28	56.3958
Pfdn1	0.675206	2.47213	5.39456e-28	1.1228e-26	52.3725
Tnc	0.674579	0.998338	5.86056e-23	9.30229e-22	40.8854
Gdpd5	0.671539	0.830678	8.43508e-40	3.0168e-38	79.3605
Eif4g2	0.671128	4.02892	1.16375e-75	1.54879e-73	161.541
Nubp2	0.6697	0.971339	2.56534e-36	7.92563e-35	71.3921
Nceh1	0.669651	0.845542	3.19463e-32	8.01029e-31	62.0291
Txnrd1	0.669311	1.39716	2.62313e-31	6.31422e-30	59.9395
Afg3l1	0.667737	1.3857	5.77767e-30	1.30242e-28	56.8716
Ppfibp1	0.667114	1.02034	1.37206e-32	3.53643e-31	62.8679
Ywhab	0.665999	2.35689	4.62878e-37	1.48647e-35	73.0931
Pcyt2	0.665545	1.60173	1.96792e-28	4.16483e-27	53.3724
Eral1	0.665028	0.655318	1.81318e-45	8.2014e-44	92.3345
Alg9	0.664237	0.74966	5.21281e-39	1.81739e-37	77.5505
Glrx	0.663889	0.743587	2.19414e-40	8.05545e-39	80.6988
Tsr3	0.663579	1.01916	2.44642e-34	6.89631e-33	66.8657
LOC499235	0.661972	2.42741	1.03236e-48	5.25325e-47	99.7654
Surf4	0.661685	2.44569	4.60924e-41	1.75265e-39	82.2497
Kifc3	0.661267	1.57758	1.09531e-27	2.24264e-26	51.6703
Ap1s1	0.661077	1.81926	1.45339e-30	3.36958e-29	58.2407
Rab1a	0.660595	2.16844	1.49312e-35	4.49266e-34	69.6426
P4hb	0.659854	3.69832	1.38756e-55	8.97439e-54	115.509
Slc50a1	0.658712	1.10285	2.48097e-32	6.30074e-31	62.28
Wfs1	0.658651	0.878725	4.24793e-34	1.17591e-32	66.3178
Tnfrsf12a	0.658423	1.73435	3.74133e-32	9.33041e-31	61.8723
Slc7a6	0.657263	1.0231	4.1613e-29	9.05606e-28	54.9132
Clec2d2	0.6561	0.521094	1.89593e-49	9.90246e-48	101.451
Lrp10	0.654517	1.81785	2.25496e-34	6.39566e-33	66.9466
Coq5	0.653825	0.765536	8.42766e-37	2.65107e-35	72.4978
Sdc3	0.653675	1.13528	2.15419e-28	4.55208e-27	53.2827
Fam167b	0.653674	0.995675	2.82634e-26	5.40323e-25	48.4485
LOC100360087	0.653584	1.67366	1.63169e-31	3.9831e-30	60.4107
St13	0.653279	1.70822	2.28001e-32	5.80104e-31	62.3638
Entpd4	0.651622	0.853929	9.79853e-35	2.84322e-33	67.7743
Slc35b2	0.649401	1.13808	6.25267e-33	1.62675e-31	63.648
Ndufa10l1	0.649187	1.22524	1.71879e-29	3.80029e-28	55.7901
Wnt5b	0.649152	0.657314	1.68964e-40	6.3036e-39	80.9585
Cyp11a1	0.64905	7.3052	3.28493e-51	1.80423e-49	105.486
Cmpk1	0.648962	1.13527	1.04332e-30	2.43518e-29	58.5696
Lpcat3	0.648572	2.79317	2.08703e-27	4.18646e-26	51.0312
Glo1	0.647567	1.37818	4.55783e-29	9.88792e-28	54.8229
Qdpr	0.647095	1.3206	2.92523e-30	6.67021e-29	57.5468
Fkbp5	0.646139	1.90316	1.31832e-24	2.28945e-23	44.642
AC134224.1	0.645922	1.16032	7.31024e-29	1.57113e-27	54.3544
Bola3	0.644543	1.624	8.11943e-30	1.81553e-28	56.534
Sdhb	0.644142	2.72929	9.17668e-35	2.66837e-33	67.8394
Prrx2	0.643565	0.614625	4.1685e-41	1.60267e-39	82.3496
Ntmt1	0.642951	1.65814	1.41094e-33	3.82918e-32	65.126
Aars	0.642766	2.04852	3.46975e-31	8.28015e-30	59.662
Pdha1	0.641343	1.50366	1.5527e-27	3.13736e-26	51.3244
Tmem70	0.641261	1.12904	1.17747e-27	2.40374e-26	51.5986
Atp6v1h	0.640883	1.13117	1.28036e-30	2.97839e-29	58.3665
Amdhd2	0.640666	0.747879	3.00085e-38	1.01058e-36	75.8113
Slc20a2	0.63892	0.72206	1.80695e-31	4.38773e-30	60.3094
Cfap36	0.637741	0.851925	1.41857e-33	3.84234e-32	65.1206
Commd4	0.636712	1.71937	3.48778e-26	6.64021e-25	48.2402
Klhl22	0.633907	1.05152	3.48731e-32	8.71262e-31	61.9421
Rpn2	0.633529	2.73518	7.59875e-34	2.08266e-32	65.7404
Sumf1	0.63153	0.915114	2.25957e-33	6.04927e-32	64.6585
Slc4a2	0.631278	1.85549	7.63058e-30	1.71175e-28	56.5956
Coasy	0.630886	1.02911	1.12606e-29	2.49771e-28	56.2096
Sft2d2	0.629362	1.26343	7.33549e-27	1.43405e-25	49.7853
Slc25a33	0.629244	0.576601	1.14545e-44	4.96995e-43	90.5015
Sri	0.627203	0.83836	2.88902e-34	8.07818e-33	66.7006
Ppp3r1	0.62612	1.38109	8.81793e-29	1.8893e-27	54.1684
Ctbp2	0.623727	0.671344	7.97002e-37	2.51283e-35	72.5533
Txn1	0.623613	1.99615	1.69808e-31	4.13061e-30	60.3711
Slc25a3	0.622592	4.25653	8.98892e-67	8.76167e-65	141.158
Ndufs2	0.622136	2.52857	2.09484e-35	6.27591e-34	69.3063
Ndufb7	0.621464	2.56644	6.234e-34	1.712e-32	65.9369
Arhgef2	0.621245	0.979356	6.51905e-28	1.35075e-26	52.1848
Cpt1a	0.620574	1.58796	3.61493e-24	6.0943e-23	43.6431
Acox1	0.619682	1.28887	1.32463e-25	2.44782e-24	46.918
Ap2m1	0.619138	2.33072	1.38275e-32	3.55736e-31	62.8602
Rab7a	0.61903	2.46684	1.22918e-34	3.5444e-33	67.5491
Maoa	0.618316	0.559898	1.95169e-42	7.85272e-41	85.3928
Bcl2l11	0.617718	0.704574	3.33655e-35	9.8889e-34	68.8441
Lpin3	0.61756	1.20079	2.20188e-27	4.39139e-26	50.9781
Jun	0.617245	2.13901	7.49496e-32	1.84916e-30	61.1827
Alas1	0.616052	4.11675	7.53542e-63	6.17147e-61	132.162
Fam32a	0.614922	1.57888	1.44303e-27	2.93721e-26	51.397
Gpd1	0.614748	1.40795	1.27427e-21	1.88633e-20	37.8389
Cdr2l	0.614236	1.21472	2.32719e-28	4.89523e-27	53.2061
Coro6	0.613433	0.482767	5.86825e-47	2.76267e-45	95.7465
Usp46	0.612944	0.643899	1.09774e-38	3.75156e-37	76.8105
Echdc1	0.612771	0.975663	4.73274e-28	9.88023e-27	52.5023
Spg7	0.612583	1.02026	1.14652e-28	2.44515e-27	53.9081
Sod1	0.612018	3.9065	1.45329e-51	8.14373e-50	106.298
Atp6v0c	0.61157	3.87266	1.03226e-58	7.55952e-57	122.679
Cox5a	0.609983	3.09429	4.92779e-36	1.51232e-34	70.7437
Hsd17b4	0.609831	1.21548	2.73298e-29	5.98532e-28	55.3302
Arl8b	0.609312	1.38427	5.60674e-27	1.10388e-25	50.0517
Gramd1a	0.608746	1.45779	1.3171e-19	1.74616e-18	33.2542
Agrn	0.60867	1.12159	1.90887e-27	3.83464e-26	51.1197
Asph	0.608028	0.824013	5.17031e-31	1.22748e-29	59.2662
Lzts1	0.607209	0.515477	2.62481e-44	1.11442e-42	89.6769
Pon2	0.60651	1.11084	9.90061e-29	2.11473e-27	54.0536
Rsrp1	0.604945	2.85106	4.78308e-31	1.1375e-29	59.3435
Smim19	0.604679	0.943053	5.39317e-30	1.21773e-28	56.9399
Psmd5	0.604675	0.922273	1.50352e-30	3.47417e-29	58.2071
Coq9	0.604016	1.15812	9.22228e-25	1.61987e-23	44.9958
Sts	0.604006	0.964284	4.00004e-28	8.36322e-27	52.669
Anxa6	0.603995	2.37172	3.83002e-29	8.34825e-28	54.9954
Pgrmc1	0.60366	3.62041	1.4803e-40	5.55253e-39	81.0899
Slc16a13	0.603609	0.686095	5.66217e-33	1.48148e-31	63.7465
Hmgcl	0.603168	1.2298	1.57657e-25	2.90563e-24	46.7455
Rab5b	0.602477	1.11705	2.72382e-28	5.72086e-27	53.05
Ccpg1	0.602131	0.760251	3.02681e-32	7.61711e-31	62.0826
Calm3	0.601793	2.25213	1.74768e-27	3.51595e-26	51.2071
Abhd13	0.601345	0.893168	2.56478e-30	5.86763e-29	57.6772
Adpgk	0.601016	0.79433	5.8145e-33	1.5156e-31	63.7202
Tex264	0.600242	1.41972	7.69043e-25	1.35769e-23	45.1757
Ucp2	0.600078	2.55038	5.43064e-31	1.28708e-29	59.2175
Raf1	0.599626	1.09447	8.92827e-27	1.73562e-25	49.5905
Jpt1	0.599513	2.68018	2.51967e-30	5.77397e-29	57.6948
Cebpb	0.599096	3.15537	3.0335e-45	1.35441e-43	91.8227
Cyp27a1	0.599001	0.994336	6.18831e-26	1.16693e-24	47.672
Bhmt	0.597887	0.447417	2.47976e-39	8.73343e-38	78.2888
Gaa	0.597767	2.83204	2.05144e-32	5.23873e-31	62.4687
Cryba4	0.597562	0.84201	6.15568e-26	1.16236e-24	47.6773
Sh3bp2	0.597417	0.623633	3.84574e-36	1.18287e-34	70.9899
Dusp22	0.596909	0.80899	1.58769e-30	3.65644e-29	58.153
Kdr	0.596729	1.17758	1.29841e-22	2.01925e-21	40.0982
Cluh	0.593706	1.72619	1.10675e-25	2.05895e-24	47.096
Bckdha	0.59292	2.55313	2.11286e-24	3.62831e-23	44.1749
LOC103689983	0.592752	1.13296	9.35694e-28	1.92436e-26	51.8265
Nmrk1	0.591997	0.611828	1.00992e-33	2.75163e-32	65.458
Dbnl	0.591573	1.57833	1.28446e-24	2.23625e-23	44.6677
Dock9	0.591436	0.72493	7.25254e-29	1.56116e-27	54.3622
LOC691807	0.591135	1.74035	3.46848e-24	5.86886e-23	43.684
Lrp6	0.590346	0.335922	7.21135e-53	4.21149e-51	109.286
Flad1	0.589876	0.703425	1.67873e-31	4.09071e-30	60.3825
Adss	0.589629	0.917561	5.0565e-28	1.05402e-26	52.4366
Hspa14	0.588994	0.736326	5.25291e-35	1.54364e-33	68.3934
Smim14	0.588908	1.48068	3.51812e-25	6.34867e-24	45.9504
Psmd2	0.588722	2.31694	1.71196e-26	3.29101e-25	48.9454
Pcbp3	0.588222	0.619815	3.78353e-36	1.16632e-34	71.0061
Gtf2i	0.588165	2.3771	5.73926e-31	1.3579e-29	59.1626
RGD1305455	0.588151	0.702903	4.44876e-34	1.22905e-32	66.2719
Creld1	0.586783	1.30294	3.90202e-25	7.00492e-24	45.8478
Eci2	0.586292	1.74332	3.02988e-26	5.78435e-25	48.3796
Tex2	0.586261	0.744475	2.31403e-33	6.18311e-32	64.6348
Gnat2	0.58551	0.371299	4.34052e-46	1.98931e-44	93.7563
Dhrs4	0.58548	0.913014	1.53748e-27	3.11571e-26	51.3342
Cog4	0.585395	0.988894	3.29035e-28	6.88983e-27	52.8627
Pbxip1	0.585198	1.86223	4.98142e-26	9.43198e-25	47.887
Smoc2	-0.593275	0.93356	3.55266e-24	5.99663e-23	43.6603
Ctsk	-0.593728	1.10398	1.31812e-24	2.28945e-23	44.6421
Procr	-0.593891	1.13963	1.28003e-21	1.89283e-20	37.8345
Nat8l	-0.60474	1.15741	2.07921e-21	3.01344e-20	37.3547
Hmgcs2	-0.605224	3.24394	1.32148e-18	1.63309e-17	30.9769
Rpl37	-0.606364	3.40192	3.25059e-33	8.60255e-32	64.2974
Zyx	-0.619215	2.0352	1.56095e-26	3.00488e-25	49.0369
Ifitm1	-0.624383	2.31883	3.29686e-27	6.54689e-26	50.578
Junb	-0.630725	2.27887	6.55128e-23	1.03749e-21	40.7752
Csrp2	-0.631386	1.7271	2.01313e-24	3.46133e-23	44.2227
Rpl12	-0.634281	3.10938	5.07235e-30	1.14904e-28	57.0007
Pebp1	-0.635636	4.59425	7.44552e-67	7.36096e-65	141.345
Haus7	-0.636704	0.950652	6.56632e-29	1.41785e-27	54.4608
Ttyh1	-0.637435	0.523061	7.016e-35	2.05303e-33	68.106
Dbi	-0.643124	3.18014	9.77165e-31	2.28462e-29	58.6346
Etnk1	-0.652827	1.51393	7.0617e-26	1.328e-24	47.5412
Wfdc1	-0.653311	1.08468	1.75633e-25	3.23263e-24	46.6385
Odc1	-0.656734	3.21094	1.46528e-27	2.97811e-26	51.3818
Actg2	-0.661708	1.0861	2.7342e-25	4.97295e-24	46.2001
Rps2	-0.663451	4.40831	3.13128e-46	1.44467e-44	94.0811
LOC100364435	-0.665181	5.13085	1.38329e-47	6.71791e-46	97.1839
Ldlr	-0.672035	1.99911	5.08288e-30	1.14954e-28	56.9987
Rarres2	-0.672755	1.1439	4.20697e-29	9.14108e-28	54.9023
Gatm	-0.676385	0.859059	8.71551e-30	1.94567e-28	56.4638
Rasd1	-0.68066	0.94655	1.73014e-28	3.66721e-27	53.5
Ptn	-0.68643	1.55141	9.22257e-28	1.89955e-26	51.8408
Crem	-0.696614	2.25927	3.24147e-31	7.74874e-30	59.7295
Prkar2b	-0.704944	1.63536	5.90376e-30	1.32868e-28	56.8501
Rps10l1	-0.707898	3.83618	5.03491e-44	2.10538e-42	89.0292
Got1	-0.708927	2.95198	5.50729e-33	1.44642e-31	63.774
Gstm3	-0.71031	1.086	1.26493e-31	3.09875e-30	60.6633
Csrp1	-0.714918	2.11945	7.33407e-33	1.90452e-31	63.4897
Marcksl1	-0.718045	2.19149	4.13294e-35	1.21711e-33	68.6315
RGD1564664	-0.722847	1.58785	2.92717e-28	6.13863e-27	52.9786
Tf	-0.723079	2.1777	1.80259e-30	4.1376e-29	58.0271
Ece1	-0.729842	1.78035	1.0115e-41	3.96606e-40	83.7572
Hao2	-0.732981	1.39904	2.91414e-25	5.28633e-24	46.1369
Mdk	-0.737831	1.52841	3.05673e-30	6.9586e-29	57.5031
Col18a1	-0.73975	2.6066	1.60062e-35	4.80568e-34	69.5736
Reg3g	-0.74008	0.889119	3.42768e-25	6.19353e-24	45.9762
Rpl36	-0.741554	3.99797	4.20956e-54	2.56672e-52	112.113
Dcn	-0.742847	2.08684	2.40871e-27	4.79698e-26	50.8891
Bst2	-0.752799	2.30331	1.67223e-34	4.78211e-33	67.2435
Glb1l3	-0.760177	0.675318	3.43688e-35	1.01645e-33	68.8147
Lcn2	-0.762212	1.14959	1.58034e-30	3.64559e-29	58.1576
Sin3b	-0.766456	2.01602	1.83817e-34	5.24579e-33	67.1495
Tmem176a	-0.772922	2.71093	2.88669e-42	1.15476e-40	85.0037
Cyp1b1	-0.781364	3.08442	3.03068e-33	8.05136e-32	64.367
Cited1	-0.784051	2.07231	4.79527e-37	1.53282e-35	73.058
Tpm2	-0.787686	1.94253	3.46193e-34	9.66059e-33	66.521
Inha	-0.798469	5.05408	4.72002e-56	3.12583e-54	116.582
Myh11	-0.809338	1.26235	2.43189e-33	6.48552e-32	64.5855
Aldh1a1	-0.8228	1.19459	1.58802e-37	5.14749e-36	74.1559
Defb24	-0.82916	0.903238	6.47834e-32	1.60119e-30	61.3274
Mapkapk2	-0.832352	2.41674	4.19669e-50	2.22553e-48	102.952
AC128207.1	-0.838326	0.690845	2.6378e-49	1.36231e-47	101.123
Reep2	-0.838538	0.966567	4.47517e-39	1.56416e-37	77.7021
Lsr	-0.841671	1.34455	2.79074e-42	1.11961e-40	85.0373
Cebpd	-0.845558	1.34233	8.28495e-40	2.97849e-38	79.3783
Mat2a	-0.8474	2.69477	2.10318e-39	7.44503e-38	78.4525
Adgrg1	-0.848391	1.6706	1.0346e-37	3.38531e-36	74.5816
Myl9	-0.848881	2.92412	1.96467e-41	7.68165e-40	83.0973
Igf1	-0.857312	1.1992	1.02493e-32	2.65161e-31	63.1575
Wfdc10a	-0.869538	1.25114	5.163e-34	1.4207e-32	66.1241
Hagh	-0.874212	2.36023	1.67763e-32	4.29207e-31	62.6684
Asns	-0.881797	1.16492	1.23932e-36	3.88086e-35	72.1147
Tmem176b	-0.882446	3.0996	7.726e-43	3.16377e-41	86.3141
Gstm7	-0.88816	1.95489	1.3721e-36	4.28697e-35	72.0136
Creb3l1	-0.893003	1.40025	7.39124e-41	2.8028e-39	81.7803
Tgm2	-0.893959	2.82912	1.56347e-56	1.06078e-54	117.682
Igfbp5	-0.90445	1.09566	2.67235e-40	9.75935e-39	80.5028
Egr1	-0.905022	1.93244	1.46572e-38	4.98451e-37	76.5233
Gadd45g	-0.905498	1.51457	1.00385e-37	3.30031e-36	74.6115
Emp3	-0.905808	2.14359	9.85758e-52	5.59175e-50	106.684
AABR07027872.1	-0.906661	1.23429	1.91419e-31	4.63998e-30	60.2522
Igfbp6	-0.917493	1.761	1.50746e-40	5.63911e-39	81.0719
Igfbp2	-0.951318	2.03121	6.10225e-40	2.19951e-38	79.6822
Fabp5	-0.984504	1.93549	2.26537e-45	1.01802e-43	92.1131
Calb2	-1.02125	1.9722	2.09665e-33	5.62397e-32	64.7327
Bok	-1.03226	1.79459	2.80612e-48	1.40215e-46	98.7707
Timp2	-1.10324	2.41457	1.38693e-56	9.45639e-55	117.801
Nppc	-1.13966	1.35644	8.19152e-38	2.71892e-36	74.8135
Enc1	-1.17474	1.57304	2.189e-55	1.39622e-53	115.056
Tceal9	-1.17619	2.34569	2.03368e-80	3.05959e-78	172.453
Insl3	-1.20841	1.63867	2.11736e-44	9.04516e-43	89.8906
Plet1	-1.23311	1.7002	3.94154e-46	1.81245e-44	93.8522
Gstm6	-1.23468	1.49274	2.77224e-47	1.32312e-45	96.4924
Tagln	-1.28242	2.42341	1.15187e-56	7.89256e-55	117.986
Aard	-1.3224	1.17695	8.05776e-53	4.68603e-51	109.176
Cldn11	-1.35452	1.68168	2.38939e-63	1.99226e-61	133.306
Akr1b10	-1.38305	1.13582	4.87633e-52	2.7775e-50	107.384
LOC103694892	-1.40062	3.70793	2.23273e-52	1.28763e-50	108.161
Mmd2	-1.41784	2.16847	1.74218e-109	6.69821e-107	239.145
Ass1	-1.42525	1.81388	1.44929e-60	1.10827e-58	126.926
Mt3	-1.43407	2.04646	1.01392e-85	1.79918e-83	184.617
Fabp3	-1.43622	1.83053	9.09661e-60	6.84273e-58	125.097
Bex3	-1.44785	2.2314	1.14102e-85	1.9741e-83	184.499
Acsbg1	-1.47342	1.90311	6.25012e-77	8.48116e-75	164.453
Tmem184a	-1.47654	1.68452	1.87707e-66	1.79176e-64	140.425
Cyp17a1	-1.64934	1.65194	1.24509e-67	1.28606e-65	143.126
Tsx	-1.67134	1.52386	2.14391e-63	1.79841e-61	133.414
Cst12	-1.80562	1.71107	5.58902e-70	6.39319e-68	148.51

## Sheet: cluster6
Tag	logFC	AveExpr	P.Value	adj.P.Val	B
Pla2g1b	2.50925	2.59336	2.14951e-155	2.97514e-151	342.229
Hp	2.17215	2.83626	2.63499e-85	1.21569e-81	183.04
Hsd17b7	2.01502	1.9878	1.57349e-108	1.08894e-104	235.844
Fabp6	1.91839	5.10736	1.92753e-79	4.4465e-76	169.701
Rln1	1.83232	5.43455	1.58705e-53	2.19664e-50	110.746
Calml3	1.37736	1.55273	3.03453e-59	4.66677e-56	123.754
Crabp2	1.36627	2.23206	2.09915e-64	4.15061e-61	135.493
Fuca1	1.33821	4.65273	3.30262e-46	2.68892e-43	94.1022
Me1	1.19511	3.03327	5.34401e-84	1.84916e-80	180.067
Dhcr24	1.18488	3.0467	4.85941e-60	8.40738e-57	125.563
Rhbg	1.16763	3.33111	3.84571e-33	1.66339e-30	64.4103
Scx	1.1482	1.47241	2.05606e-30	6.77571e-28	58.2176
Abcb1b	1.09194	1.27981	3.18411e-38	1.8363e-35	75.9537
Sfrp4	1.08055	1.35943	5.56233e-27	1.2621e-24	50.4317
A2m	1.05389	2.02639	1.1678e-50	1.46941e-47	104.225
Cyp19a1	1.04172	0.435587	3.31708e-83	9.18235e-80	178.264
Prdx3	1.0343	3.99985	1.68296e-45	1.2941e-42	92.4942
Vnn1	1.00363	0.930777	4.80617e-49	5.54352e-46	100.554
Avpi1	0.997419	3.33728	2.5364e-26	5.57243e-24	48.9376
Ptges	0.971951	1.16055	3.99862e-42	2.63547e-39	84.8196
Rgs3	0.960082	2.23372	5.98956e-48	5.92153e-45	98.0622
Acat1	0.954787	1.49568	1.48894e-36	7.36015e-34	72.1598
Xpnpep2	0.947232	0.948148	2.36733e-39	1.42462e-36	78.5186
Folr1	0.942946	3.24518	5.44612e-49	5.79844e-46	100.43
Glmp	0.921669	2.72216	6.39781e-44	4.66064e-41	88.9021
Mfge8	0.921206	5.72881	1.13629e-19	1.2482e-17	33.8781
Plpp1	0.915564	1.05051	8.12851e-29	2.4458e-26	54.5941
LOC100910200	0.914052	2.16325	1.34844e-31	5.04424e-29	60.903
Nr5a2	0.905506	1.05815	8.66621e-41	5.45223e-38	81.7831
Acp5	0.889094	1.34985	1.30949e-28	3.8563e-26	54.1243
Arsb	0.888984	1.77086	7.67695e-32	3.2199e-29	61.4584
Hmgcs2	0.887867	3.24394	2.41566e-26	5.39277e-24	48.9857
Sdc1	0.884952	2.90869	1.70893e-15	1.13718e-13	24.4491
Idh1	0.880367	4.35762	1.20647e-17	1.09142e-15	29.3011
Fam167b	0.873443	0.995675	3.56588e-31	1.29883e-28	59.9444
Sptan1	0.87082	2.78782	1.23115e-37	6.81615e-35	74.6192
Gstt1	0.866991	3.28998	3.24134e-22	4.98483e-20	39.6347
Tmem86a	0.864874	2.89188	3.02331e-25	6.15376e-23	46.4982
Suclg2	0.858003	2.056	4.89528e-35	2.25852e-32	68.7141
Rgcc	0.850019	2.23104	1.2158e-14	7.2534e-13	22.5298
Bcat1	0.844178	2.96554	3.74297e-16	2.71238e-14	25.9356
Kdr	0.838256	1.17758	1.4322e-29	4.50525e-27	56.3047
Ostf1	0.837666	2.47161	3.3662e-19	3.52967e-17	32.8121
Plscr1	0.821792	1.44626	7.02045e-19	6.99065e-17	32.0907
Prdx5	0.817522	3.60738	1.32595e-21	1.91171e-19	38.2501
Smpdl3a	0.814097	1.24927	2.78284e-27	6.87808e-25	51.1137
Dhcr7	0.813079	3.2638	4.72213e-25	9.2055e-23	46.0593
Ghitm	0.812599	3.08211	3.06672e-23	4.93564e-21	41.9533
Gpihbp1	0.803413	0.809331	7.18018e-30	2.31118e-27	56.9851
Acaa2	0.802713	3.98497	7.12998e-25	1.37064e-22	45.6538
Aldh3b1	0.79784	2.12649	5.90822e-19	6.01291e-17	32.26
Iscu	0.797821	3.02048	3.02445e-28	8.37228e-26	53.2996
Creg1	0.788174	2.95988	2.67808e-16	2.00364e-14	26.2634
Spata6	0.787786	0.787693	9.06372e-31	3.05978e-28	59.0249
Ccl6	0.786694	0.787937	7.49147e-28	1.99403e-25	52.4062
Lrp11	0.785385	1.86156	4.79448e-16	3.4031e-14	25.6932
Tnc	0.783976	0.998338	1.20426e-20	1.48823e-18	36.0823
Retsat	0.767966	2.55671	2.7751e-25	5.73285e-23	46.5825
Gpnmb	0.756814	1.48981	1.93566e-17	1.66406e-15	28.8376
Snap91	0.751045	1.02391	2.08823e-20	2.49165e-18	35.5416
Bpifb6	0.747998	0.780403	6.31678e-26	1.3661e-23	48.0393
Tmem59	0.743567	2.58358	2.76635e-23	4.5046e-21	42.0546
Cybb	0.74144	0.728818	9.0219e-32	3.67271e-29	61.2992
Decr1	0.741128	2.63424	1.5383e-17	1.37365e-15	29.0629
LOC100134871	0.739473	0.90843	1.51369e-15	1.01213e-13	24.5678
Scd2	0.736159	4.45705	2.19262e-28	6.19349e-26	53.6165
Glrx5	0.733237	2.19621	3.63097e-21	4.83233e-19	37.2602
Orm1	0.732087	0.842638	3.0835e-15	1.96676e-13	23.8716
Dmkn	0.729958	2.87312	7.52627e-10	2.21641e-08	11.7819
Tmem70	0.7217	1.12904	2.73744e-23	4.5046e-21	42.065
Fdxr	0.716611	4.58559	1.08578e-18	1.05093e-16	31.6628
Ppcdc	0.716305	2.28606	6.02187e-13	2.91429e-11	18.7184
Dnajc15	0.715398	3.31203	1.47e-20	1.80055e-18	35.8864
Srp14	0.712016	2.49333	1.59157e-20	1.93237e-18	35.8084
Cmbl	0.711494	1.14567	1.04802e-20	1.30682e-18	36.2188
Cops9	0.709618	3.92354	6.44925e-21	8.11491e-19	36.6958
Fbxo16	0.705834	0.333174	8.24962e-44	5.70915e-41	88.6511
Slc16a11	0.703094	1.32997	9.46968e-18	8.62302e-16	29.5385
Stmn1	0.699506	1.26724	1.8582e-20	2.23646e-18	35.6562
Gadd45a	0.697284	3.40482	2.40582e-10	7.74394e-09	12.8882
Tns3	0.69013	2.01139	4.13556e-23	6.57934e-21	41.6592
Marveld1	0.68875	1.31948	5.18513e-22	7.71693e-20	39.1729
Cyb5a	0.683678	2.13983	2.19359e-25	4.60022e-23	46.8139
Sirt2	0.683428	1.45028	4.68194e-19	4.83602e-17	32.4883
Vnn3	0.674472	0.557998	9.5699e-32	3.78448e-29	61.2411
Dhfr	0.67337	2.7992	2.93702e-09	7.93972e-08	10.4631
Fkbp1a	0.6731	3.39789	1.81272e-24	3.34531e-22	44.7356
AABR07026294.1	0.671617	1.51928	9.08126e-20	1.0219e-17	34.0982
Sptlc1	0.668429	1.88203	1.38747e-15	9.4601e-14	24.653
Cryba4	0.662784	0.84201	2.92889e-21	3.97439e-19	37.4713
Gstt3	0.662288	4.21542	2.52821e-14	1.4765e-12	21.8142
Sec11c	0.660793	1.19128	1.32824e-22	2.06563e-20	40.5118
RT1-CE10	0.65918	4.08459	2.05593e-18	1.94905e-16	31.0365
Hmgcl	0.656915	1.2298	3.29859e-20	3.86913e-18	35.0926
Serinc3	0.654974	2.12471	1.12148e-18	1.07794e-16	31.6311
Syt13	0.654526	1.69871	4.86504e-15	3.0196e-13	23.4255
Hsd3b3	0.650649	2.15905	1.92575e-11	7.28258e-10	15.3423
Acsl3	0.648323	1.46054	2.97419e-13	1.49694e-11	19.4067
Dhrs3	0.642069	1.68687	4.57545e-19	4.76157e-17	32.5108
Kifc3	0.638138	1.57758	2.45825e-17	2.07365e-15	28.6033
Fuca2	0.637634	1.27317	1.50105e-17	1.34909e-15	29.0869
C1qb	0.636574	1.73638	6.17308e-14	3.40405e-12	20.9419
Cyp11a1	0.634216	7.3052	1.07533e-31	4.13434e-29	61.1262
Ctsd	0.633732	4.70671	1.87684e-17	1.62358e-15	28.8679
Itga8	0.6309	0.648906	6.11952e-24	1.07216e-21	43.5386
Acads	0.625606	1.82009	6.67027e-14	3.64914e-12	20.8663
Mrps12	0.625437	2.04056	3.49154e-15	2.21681e-13	23.75
Dpcd	0.62541	1.04673	4.06818e-18	3.80458e-16	30.3671
Sqle	0.620395	1.05821	3.56293e-17	2.95296e-15	28.2396
Vipr2	0.61727	0.799953	1.84862e-19	1.98347e-17	33.4003
Oxct1	0.617205	1.15802	2.86952e-17	2.39259e-15	28.4517
Vegfa	0.615876	1.93269	8.52686e-15	5.15373e-13	22.8767
Pgam1	0.614618	4.2912	1.96266e-21	2.74396e-19	37.8647
Msmo1	0.612812	2.73374	5.83323e-17	4.69405e-15	27.7565
C1qa	0.611873	1.87308	1.39511e-12	6.24912e-11	17.899
Klhdc8a	0.610805	3.75299	3.39952e-12	1.43453e-10	17.0309
Cntfr	0.609435	0.273722	1.44171e-47	1.24716e-44	97.1947
Tango2	0.608925	1.41188	6.9264e-13	3.3058e-11	18.5819
Tmem123	0.607599	1.65056	9.17764e-22	1.33713e-19	38.6117
Hdhd2	0.605277	1.07043	8.21181e-18	7.52713e-16	29.6783
Amdhd1	0.599324	0.616962	2.69317e-14	1.55317e-12	21.7524
Rab3a	0.598502	1.42966	4.4418e-13	2.1801e-11	19.0153
Cd68	0.598249	0.814799	2.47202e-17	2.07365e-15	28.5979
Cd74	0.598005	3.72894	2.84804e-12	1.22803e-10	17.2034
Mpc2	0.590021	0.834642	4.17866e-18	3.88167e-16	30.3408
Akr1c3	0.588719	6.39936	1.46387e-05	0.000178045	2.29289
Bckdha	0.587122	2.55313	3.80842e-16	2.74543e-14	25.9186
Mroh1	0.587106	1.03638	2.88544e-16	2.14717e-14	26.1904
Igf1	-0.593422	1.1992	5.841e-11	2.04155e-09	14.2632
Adgrg1	-0.593738	1.6706	1.1952e-12	5.4417e-11	18.0498
Col18a1	-0.611759	2.6066	2.52893e-16	1.90233e-14	26.3195
Nr4a1	-0.614215	2.23811	3.53969e-15	2.23712e-13	23.7366
Sin3b	-0.626783	2.01602	1.4962e-15	1.01019e-13	24.5791
Tmem176b	-0.62688	3.0996	1.58097e-14	9.3915e-13	22.2731
Lcn2	-0.627931	1.14959	4.00682e-14	2.26361e-12	21.3642
Igfbp6	-0.628522	1.761	5.87683e-13	2.86413e-11	18.7422
Fabp5	-0.630062	1.93549	1.3172e-12	5.97748e-11	17.955
Penk	-0.630616	1.18277	9.23926e-17	7.1843e-15	27.3059
Tmem120a	-0.633591	1.85456	1.08716e-19	1.20379e-17	33.9215
Asns	-0.634241	1.16492	5.82055e-13	2.84672e-11	18.7515
Wfdc1	-0.645786	1.08468	9.073e-17	7.09488e-15	27.3237
AABR07027872.1	-0.653979	1.23429	2.15148e-11	8.07008e-10	15.2345
Hagh	-0.654138	2.36023	1.56533e-12	6.96649e-11	17.7868
Cyp1b1	-0.661136	3.08442	4.83975e-16	3.4177e-14	25.684
Mdk	-0.663494	1.52841	1.7571e-16	1.33627e-14	26.6762
Dbi	-0.664563	3.18014	7.79481e-22	1.14774e-19	38.7722
Cebpd	-0.674711	1.34233	6.46966e-17	5.14635e-15	27.655
Myh11	-0.679987	1.26235	7.14371e-16	4.96865e-14	25.3028
Junb	-0.683975	2.27887	4.84116e-18	4.4671e-16	30.1965
Reep2	-0.687729	0.966567	1.60588e-17	1.41573e-15	29.0207
Tf	-0.692871	2.1777	1.01018e-18	9.84641e-17	31.7336
Defb24	-0.698502	0.903238	2.50297e-15	1.61886e-13	24.0756
Glb1l3	-0.708241	0.675318	2.63635e-20	3.11878e-18	35.3127
Igfbp2	-0.724608	2.03121	1.50697e-15	1.01213e-13	24.5721
Wfdc10a	-0.734675	1.25114	2.4594e-16	1.86014e-14	26.3468
Hspa8	-0.744526	4.117	1.66587e-37	8.86819e-35	74.3209
Myl9	-0.746392	2.92412	4.0509e-21	5.33985e-19	37.1526
Gadd45g	-0.754665	1.51457	1.70493e-17	1.48914e-15	28.962
Mat2a	-0.768552	2.69477	2.05639e-21	2.84625e-19	37.8188
Egr1	-0.774023	1.93244	9.53043e-19	9.35536e-17	31.7908
Bex3	-0.780786	2.2314	1.94812e-15	1.28399e-13	24.3209
Gstm7	-0.800241	1.95489	9.68114e-20	1.08062e-17	34.0354
Inha	-0.804712	5.05408	9.28551e-37	4.76003e-34	72.6256
Timp2	-0.892468	2.41457	8.78877e-24	1.52057e-21	43.1825
Bok	-0.893581	1.79459	1.47413e-23	2.48822e-21	42.6738
Dcn	-0.942939	2.08684	2.94426e-29	9.05589e-27	55.5946
Enc1	-0.943175	1.57304	5.41969e-23	8.5243e-21	41.3933
Calb2	-0.952961	1.9722	2.12587e-19	2.2634e-17	33.2632
Tagln	-0.986094	2.42341	1.45568e-21	2.07712e-19	38.1583
Plet1	-1.02613	1.7002	6.24165e-21	7.99913e-19	36.7279
Clu	-1.03841	3.84645	6.56438e-48	6.05717e-45	97.9717
Insl3	-1.03853	1.63867	1.5979e-21	2.25679e-19	38.0667
Nppc	-1.04491	1.35644	4.75432e-21	6.20798e-19	36.9953
Akr1b10	-1.1206	1.13582	3.82899e-22	5.82385e-20	39.471
Ass1	-1.13808	1.81388	1.2866e-24	2.40646e-22	45.0729
Aard	-1.14345	1.17695	1.67001e-25	3.5561e-23	47.0823
Gstm6	-1.15636	1.49274	5.17419e-27	1.1936e-24	50.5029
LOC103694892	-1.18494	3.70793	3.05452e-24	5.51588e-22	44.2222
Cldn11	-1.18653	1.68168	7.71312e-31	2.66893e-28	59.1839
Tmem184a	-1.19851	1.68452	1.35917e-27	3.54949e-25	51.8194
Fabp3	-1.20941	1.83053	4.89258e-27	1.14777e-24	50.558
Acsbg1	-1.24272	1.90311	6.62954e-34	2.95998e-31	66.1439
Cyp17a1	-1.26679	1.65194	4.2429e-25	8.38943e-23	46.1646
Tsx	-1.39831	1.52386	3.99166e-28	1.0833e-25	53.0263
Cst12	-1.42638	1.71107	2.43572e-27	6.12959e-25	51.2449

## Sheet: cluster9
Tag	logFC	AveExpr	P.Value	adj.P.Val	B
LOC103694892	2.53321	3.70793	3.42605e-97	1.58066e-93	210.415
Insl3	2.47383	1.63867	1.36672e-109	1.89167e-105	238.679
Calb2	2.34355	1.9722	1.28872e-103	8.91856e-100	225.061
Akr1b10	2.25374	1.13582	4.77126e-75	6.00354e-72	159.92
Fabp3	2.22353	1.83053	4.39099e-77	6.07757e-74	164.564
Plet1	2.03408	1.7002	7.29275e-68	6.72926e-65	143.537
Nppc	2.01155	1.35644	6.59555e-64	5.07161e-61	134.515
AABR07027872.1	1.86372	1.23429	7.75334e-74	8.94283e-71	157.159
Igf1	1.84211	1.1992	7.0001e-86	2.42221e-82	184.626
Cyp17a1	1.83923	1.65194	5.58033e-42	2.27169e-39	84.5347
Hao2	1.76726	1.39904	3.43998e-83	6.80183e-80	178.488
Gadd45g	1.68332	1.51457	8.71107e-72	9.27461e-69	152.483
Bex3	1.68092	2.2314	5.78853e-57	3.81519e-54	118.684
Tmem176b	1.50163	3.0996	2.6292e-67	2.27442e-64	142.267
Igfbp2	1.48739	2.03121	9.92034e-52	5.96989e-49	106.752
Ass1	1.48207	1.81388	8.37008e-33	1.99742e-30	63.645
Enc1	1.48029	1.57304	4.56657e-45	2.0389e-42	91.5674
Hagh	1.47846	2.36023	2.015e-49	1.11558e-46	101.492
Cyp1b1	1.45155	3.08442	2.53301e-62	1.84523e-59	130.902
Rbp4	1.35519	0.764221	7.15036e-71	7.06915e-68	150.398
Hspe1	1.31485	3.63745	4.42596e-85	1.021e-81	182.799
Tceal9	1.3106	2.34569	3.93818e-49	2.09647e-46	100.829
Aadat	1.30008	0.528489	3.19429e-85	8.84243e-82	183.122
Il18	1.29476	1.1667	1.64413e-57	1.13782e-54	119.93
Mmd2	1.24177	2.16847	2.10588e-38	6.93987e-36	76.389
Asns	1.23034	1.16492	3.62423e-37	1.11473e-34	73.5755
Reg3g	1.19648	0.889119	2.13953e-34	5.80652e-32	67.2682
Acsbg1	1.18819	1.90311	2.86496e-24	3.44817e-22	44.2489
Odc1	1.18554	3.21094	1.02933e-47	5.27666e-45	97.5991
Bco2	1.15904	0.672643	1.96874e-56	1.23861e-53	117.472
Got1	1.15272	2.95198	4.05788e-46	1.87217e-43	93.9628
LOC102556347	1.13487	3.39212	5.55246e-50	3.20215e-47	102.768
Tmem176a	1.11647	2.71093	3.4578e-46	1.65033e-43	94.1212
Parm1	1.1038	1.16431	4.43027e-44	1.91623e-41	89.3191
Dbi	1.0837	3.18014	3.20382e-46	1.58372e-43	94.1967
Hspa8	1.08144	4.117	8.63611e-65	7.03132e-62	136.529
AC128207.1	1.07514	0.690845	8.72263e-42	3.44943e-39	84.0928
RGD1560394	1.06134	1.33387	1.14031e-38	3.84953e-36	76.9956
Jak2	1.05332	1.09505	9.81099e-40	3.57352e-37	79.4215
Creb3l1	1.04216	1.40025	1.07248e-28	1.78845e-26	54.3041
Timp2	1.02432	2.41457	1.43432e-24	1.80476e-22	44.931
Etnk1	1.02308	1.51393	3.54832e-33	8.92951e-31	64.4929
Nampt	1.01227	1.49209	1.44767e-32	3.33953e-30	63.1037
Eprs	1.01198	1.68845	2.30797e-37	7.26015e-35	74.0216
Smoc2	1.00317	0.93356	3.77877e-36	1.04604e-33	71.2578
Bst2	0.997683	2.30331	1.68859e-31	3.83144e-29	60.677
Ephx1	0.986153	1.25323	1.15073e-29	2.12364e-27	56.5078
Tpt1	0.959422	5.35269	1.84088e-78	2.83107e-75	167.705
Nat8l	0.958532	1.15741	6.47111e-28	9.63081e-26	52.5301
Rasd1	0.927271	0.94655	1.54877e-27	2.25648e-25	51.6688
Ldlr	0.908376	1.99911	1.47764e-28	2.37815e-26	53.9878
Vwa5a	0.894335	1.3079	3.01255e-30	5.79121e-28	57.8311
Egr1	0.893799	1.93244	1.40933e-19	1.06014e-17	33.6103
Myh6	0.892265	0.434471	3.05305e-43	1.28052e-40	87.4093
Cited2	0.861797	1.39237	2.50566e-26	3.46809e-24	48.9223
Nr4a1	0.861229	2.23811	5.87911e-23	6.21166e-21	41.2713
Mapkapk2	0.857897	2.41674	4.40939e-27	6.16469e-25	50.6364
Nfil3	0.824638	0.990607	5.43795e-23	5.83462e-21	41.3481
Rps24	0.822488	4.36016	6.50403e-40	2.50062e-37	79.828
Lum	0.812999	2.53645	3.18912e-24	3.7727e-22	44.1433
Dcn	0.81009	2.08684	3.63841e-17	2.1521e-15	28.1525
Gja1	0.806886	2.4179	7.96774e-30	1.49029e-27	56.8707
Crem	0.806325	2.25927	7.93926e-22	7.37498e-20	38.7073
Ano1	0.803978	1.69399	1.54975e-21	1.41119e-19	38.0487
Fdx1	0.80099	5.83604	9.50469e-83	1.64443e-79	177.482
Rpl32	0.797565	3.46267	4.07626e-33	1.00749e-30	64.3558
Rps2	0.786709	4.40831	2.35597e-33	6.03869e-31	64.8975
Junb	0.78229	2.27887	1.70317e-18	1.11723e-16	31.1601
Rpl12	0.777824	3.10938	1.55668e-23	1.72368e-21	42.5807
Procr	0.756137	1.13963	2.27029e-18	1.48222e-16	30.8777
Cebpd	0.754896	1.34233	1.2427e-16	7.02052e-15	26.9467
Rpl13	0.750531	4.75571	3.81213e-28	5.86263e-26	53.0523
Slc25a25	0.749189	1.69226	1.84663e-22	1.85212e-20	40.1437
Sod2	0.736362	3.11356	9.2867e-37	2.67786e-34	72.6452
Rpl6	0.735762	3.38722	1.96778e-30	3.83607e-28	58.2517
Gem	0.729548	0.911591	1.76251e-20	1.47848e-18	35.6556
Igfbp5	0.725524	1.09566	8.84576e-14	3.82607e-12	20.51
LOC108348061	0.718395	4.37858	7.37868e-37	2.17294e-34	72.8726
Tmem178a	0.718069	1.68627	9.71455e-23	1.01097e-20	40.7765
Inha	0.714456	5.05408	1.16989e-22	1.19063e-20	40.5934
Serpine1	0.710259	0.723709	2.34998e-20	1.9133e-18	35.3725
RGD1562747	0.710029	0.69578	1.06264e-22	1.08949e-20	40.6881
Rpl34	0.70959	4.26089	3.05373e-31	6.40403e-29	60.0918
Fabp5	0.705082	1.93549	2.08144e-12	7.46354e-11	17.4228
Ddx46	0.703645	0.861478	2.4733e-21	2.22292e-19	37.5885
Tsc22d1	0.703178	4.06609	7.81347e-39	2.70365e-36	77.3694
Dnaja1	0.695397	2.25884	7.02842e-20	5.37461e-18	34.2946
Sec61b	0.691035	2.94788	2.05007e-31	4.52004e-29	60.4854
Rpl37	0.686982	3.40192	3.27309e-22	3.16803e-20	39.58
Tgm2	0.685579	2.82912	5.66385e-17	3.29384e-15	27.718
LOC100360522	0.682101	6.13536	7.17813e-39	2.5475e-36	77.4533
Cst12	0.67788	1.71107	8.77001e-06	0.000107389	2.66652
Gnai3	0.676627	1.56864	1.29688e-18	8.79908e-17	31.428
LOC100365697	0.675587	1.01957	2.07917e-19	1.54719e-17	33.2278
Rps15a	0.673939	4.75818	4.40285e-28	6.62389e-26	52.9101
Mtch1	0.670491	2.97894	1.66171e-21	1.50325e-19	37.98
LOC100360057	0.667392	4.00249	8.4621e-25	1.10494e-22	45.4512
Rps20	0.662849	4.06866	6.9053e-25	9.1025e-23	45.6517
Rps25	0.659627	1.96371	1.83582e-16	1.00832e-14	26.5637
LOC684988	0.652811	3.68383	4.27537e-26	5.85895e-24	48.3953
Rpl36	0.652139	3.99797	3.11764e-21	2.78395e-19	37.3605
Ifitm1	0.646128	2.31883	1.74874e-15	8.89863e-14	24.3529
Spsb1	0.645532	2.55652	4.51824e-20	3.59408e-18	34.7293
Rps18l1	0.644385	4.27694	2.01612e-24	2.44782e-22	44.5953
Slc6a5	0.643418	0.376047	2.51714e-27	3.55507e-25	51.1896
Lama5	0.642987	1.06027	7.20263e-17	4.13658e-15	27.482
Lipa	0.64026	1.92722	1.98163e-17	1.18735e-15	28.7491
Sec23b	0.638838	1.483	8.13614e-17	4.63425e-15	27.3624
RGD1564664	0.638685	1.58785	5.34309e-12	1.79065e-10	16.5026
Aox1	0.637924	0.927924	1.43079e-16	7.95325e-15	26.8083
Rps10l1	0.637477	3.83618	1.67553e-18	1.10781e-16	31.1762
Gabarapl1	0.637268	2.12197	3.14741e-20	2.54756e-18	35.085
Mt2A	0.635207	3.58235	6.66531e-16	3.58967e-14	25.2988
Rph3al	0.634678	0.39398	2.46706e-25	3.3152e-23	46.6666
Pebp1	0.634147	4.59425	5.94748e-33	1.44419e-30	63.9826
LOC103694404	0.620228	2.29061	3.88976e-15	1.92968e-13	23.5693
LOC100364457	0.615161	4.47304	6.86246e-29	1.18729e-26	54.7449
Gramd1b	0.610275	1.21605	3.69063e-15	1.84411e-13	23.6208
AABR07028446.1	0.609174	0.429071	1.52888e-24	1.90642e-22	44.868
Prkar2b	0.600053	1.63536	8.09172e-12	2.66027e-10	16.0976
Gclm	0.597247	1.00541	2.51842e-14	1.12443e-12	21.7396
Brd8	0.5969	2.99171	9.56024e-25	1.22522e-22	45.3309
Ddit4	0.596691	2.86713	5.58481e-21	4.83121e-19	36.7867
Rps23	0.594585	4.743	1.04164e-27	1.53376e-25	52.0603
Rpl26	0.591734	3.38868	1.31191e-19	9.97701e-18	33.6807
Gsta5	0.591226	0.214232	6.9267e-40	2.59115e-37	79.7658
Ifitm2	0.590355	3.74163	5.57278e-20	4.31753e-18	34.5229
Rpl17	0.589256	4.29219	8.77284e-19	6.10175e-17	31.8123
Rps19	0.587813	2.08411	7.34914e-13	2.84928e-11	18.4397
Rps3a	0.585725	4.24334	4.99297e-24	5.75898e-22	43.7014
Glrx3	-0.586815	2.12628	4.47551e-11	1.27198e-09	14.4305
Glrx5	-0.587324	2.19621	3.56188e-11	1.04397e-09	14.6529
Got2	-0.588243	2.29248	2.5419e-13	1.03478e-11	19.4775
Taldo1	-0.590012	2.47944	1.06086e-11	3.39106e-10	15.8335
Nucb1	-0.590539	2.37129	1.03825e-15	5.50593e-14	24.8641
Slc35f6	-0.593249	1.30065	9.2478e-12	2.99829e-10	15.9674
Ltn1	-0.594227	1.17964	1.55919e-12	5.69413e-11	17.7049
Epas1	-0.594413	1.96669	5.14456e-15	2.48971e-13	23.2953
Tpd52	-0.594883	1.3582	1.13642e-11	3.6159e-10	15.7664
Acads	-0.595622	1.82009	3.1161e-10	8.03164e-09	12.5422
Fam167b	-0.596254	0.995675	6.70026e-12	2.22394e-10	16.2817
Mrps12	-0.598014	2.04056	3.22116e-11	9.50619e-10	14.7509
Pdlim1	-0.598621	1.117	5.08587e-13	2.01527e-11	18.7995
Fkbp8	-0.599364	2.76464	1.33106e-16	7.42873e-15	26.8792
Cdk18	-0.600608	1.23965	1.71232e-10	4.51433e-09	13.1244
Rangap1	-0.601004	1.86932	2.14602e-11	6.52815e-10	15.1466
Dusp1	-0.601843	1.82132	3.61565e-11	1.05356e-09	14.6383
Serf1	-0.605725	0.86081	1.39123e-14	6.37615e-13	22.3207
Akr1b7	-0.605872	0.884559	1.42193e-11	4.46279e-10	15.5479
Mtap	-0.605879	0.914723	2.0483e-14	9.23468e-13	21.9419
Gpihbp1	-0.606316	0.809331	9.61292e-14	4.10656e-12	20.4286
Hbs1l	-0.607602	1.2679	1.23541e-12	4.63397e-11	17.9323
Suclg1	-0.608863	2.69686	4.54564e-12	1.54064e-10	16.6603
Jpt1	-0.610428	2.68018	1.28735e-16	7.2432e-15	26.912
Maged2	-0.610882	2.4206	2.24002e-14	1.00663e-12	21.8543
Kifc3	-0.612211	1.57758	8.10378e-13	3.12436e-11	18.3442
Sparc	-0.613537	3.83259	1.28424e-18	8.75621e-17	31.4376
Kdr	-0.61619	1.17758	5.5873e-13	2.20324e-11	18.7076
Psmb7	-0.616897	2.5992	6.5535e-17	3.77946e-15	27.5747
Nme1	-0.622637	1.86098	1.10898e-11	3.53673e-10	15.7902
Mocs2	-0.62395	1.45678	1.16031e-11	3.68345e-10	15.7461
Dusp14	-0.62645	1.61156	4.83598e-13	1.92341e-11	18.8487
Ywhag	-0.626788	2.63566	5.91235e-17	3.42397e-15	27.6758
Syt13	-0.629312	1.69871	3.15881e-11	9.36212e-10	14.7699
Copz2	-0.630313	1.47312	1.89639e-11	5.85892e-10	15.2672
AABR07026294.1	-0.630346	1.51928	5.76832e-14	2.52656e-12	20.9283
AABR07044711.1	-0.63088	3.21849	7.35327e-17	4.20565e-15	27.4617
Cpe	-0.632446	0.98941	3.04756e-10	7.86964e-09	12.5638
Plbd1	-0.633766	2.70654	1.43333e-09	3.40288e-08	11.06
Marveld1	-0.634876	1.31948	5.73884e-15	2.73901e-13	23.1882
Tmem70	-0.634952	1.12904	1.75098e-14	7.99843e-13	22.0955
Ndfip1	-0.63506	3.26836	7.85752e-18	4.94345e-16	29.6577
Rab11a	-0.636461	2.67536	1.95483e-15	9.87473e-14	24.2437
Asah1	-0.636968	2.06469	9.71452e-13	3.6838e-11	18.1671
Aifm2	-0.637317	1.07983	3.84184e-15	1.91277e-13	23.5815
Acaa2	-0.638359	3.98497	8.54918e-13	3.27782e-11	18.2919
Tnc	-0.638922	0.998338	2.90397e-11	8.68118e-10	14.8519
Me1	-0.640179	3.03327	1.45156e-17	8.88984e-16	29.0549
Ghitm	-0.640671	3.08211	7.78397e-12	2.56519e-10	16.1355
Igf2r	-0.641672	1.25893	8.68157e-14	3.76682e-12	20.5283
Dpy19l1	-0.642139	1.20765	4.71159e-13	1.87934e-11	18.8742
Bckdha	-0.650925	2.55313	1.31361e-15	6.80961e-14	24.6334
Ethe1	-0.65354	1.63365	2.2791e-12	8.13018e-11	17.3342
Zbtb8os	-0.655628	1.30752	1.35921e-13	5.7182e-12	20.0897
Decr1	-0.656342	2.63424	3.1966e-11	9.45387e-10	14.7583
Enah	-0.657256	0.936948	8.89222e-16	4.75202e-14	25.0161
Vegfa	-0.657888	1.93269	2.30486e-13	9.43835e-12	19.5732
Acp5	-0.658444	1.34985	9.05151e-13	3.45129e-11	18.2361
St3gal5	-0.658986	1.64576	6.31276e-11	1.76938e-09	14.0955
Atp6v0e1	-0.659502	3.23731	9.81023e-16	5.22244e-14	24.9197
Fam91a1	-0.661572	1.99036	2.07525e-15	1.04449e-13	24.1851
Rab3a	-0.661748	1.42966	1.35899e-12	5.0564e-11	17.8391
Tmem86a	-0.661772	2.89188	4.27906e-12	1.46238e-10	16.7193
S100a4	-0.662178	1.2036	1.40397e-12	5.1958e-11	17.8073
Abcb1b	-0.663236	1.27981	1.59038e-11	4.96896e-10	15.4387
Ypel5	-0.663381	1.88505	1.91094e-14	8.67191e-13	22.0099
Tef	-0.664003	1.72168	7.78413e-09	1.69403e-07	9.41996
Uqcrb	-0.665793	3.02998	8.04905e-14	3.50336e-12	20.6023
Xpnpep2	-0.666412	0.948148	1.82865e-15	9.27117e-14	24.3091
Phka1	-0.667808	1.01102	5.23053e-15	2.5225e-13	23.2791
Dhcr24	-0.670101	3.0467	8.15706e-15	3.8402e-13	22.8437
Nit1	-0.670371	1.97476	7.35895e-15	3.50018e-13	22.9446
Lipg	-0.675251	3.35838	4.73662e-12	1.59901e-10	16.6201
Tmem59	-0.679782	2.58358	1.50034e-15	7.69117e-14	24.5031
Greb1	-0.681984	1.90659	2.69189e-14	1.19802e-12	21.6744
Acot9	-0.687046	1.23896	9.63077e-15	4.50336e-13	22.681
Pacsin2	-0.688922	1.48322	2.87048e-14	1.27341e-12	21.6115
Hes6	-0.690091	2.09439	3.56763e-11	1.04397e-09	14.6513
Fam19a5	-0.692088	0.965785	1.01639e-13	4.32857e-12	20.3741
Dbp	-0.694899	2.57294	4.00604e-11	1.15516e-09	14.5384
Gulp1	-0.69569	1.18259	7.13797e-16	3.82933e-14	25.2316
Cd74	-0.696058	3.72894	5.6865e-13	2.23599e-11	18.6904
Ptgfr	-0.696501	0.836343	4.949e-17	2.91486e-15	27.8504
Srp14	-0.697272	2.49333	1.15028e-15	6.07673e-14	24.7636
Dnajc15	-0.698872	3.31203	1.27896e-15	6.6549e-14	24.6597
Pgk1	-0.703923	3.73567	4.25071e-13	1.70041e-11	18.9748
Ei24	-0.706272	1.65451	9.69048e-12	3.12648e-10	15.9218
Ap2s1	-0.708621	2.33338	5.95218e-19	4.2686e-17	32.1936
Farp2	-0.713271	1.12142	7.65282e-15	3.61511e-13	22.9062
Slc25a39	-0.721243	2.29536	3.94786e-14	1.74576e-12	21.2995
Atp6ap2	-0.723015	1.95244	1.27277e-14	5.89177e-13	22.4079
G6pd	-0.732866	2.16692	1.02883e-14	4.79461e-13	22.6163
Slc4a2	-0.735903	1.85549	3.38412e-21	3.00254e-19	37.2798
Arsb	-0.741128	1.77086	1.5041e-17	9.17102e-16	29.0199
Smpd1	-0.741844	2.79618	1.45921e-16	8.07876e-15	26.789
Vmp1	-0.742604	2.27548	1.44632e-17	8.88984e-16	29.0584
Klhdc8a	-0.746077	3.75299	4.43897e-14	1.95668e-12	21.1847
Reep5	-0.746248	3.47803	6.75688e-19	4.796e-17	32.0689
Fkbp1a	-0.749668	3.39789	7.98022e-24	9.12845e-22	43.2392
Fdxr	-0.752352	4.58559	2.73133e-16	1.48836e-14	26.1739
Sec14l1	-0.753592	1.8989	5.61037e-17	3.2765e-15	27.7273
Plpp1	-0.754379	1.05051	1.20265e-15	6.32924e-14	24.72
Tcta	-0.757421	1.33129	2.65823e-16	1.45425e-14	26.2005
Slc22a17	-0.758536	2.05604	2.5787e-18	1.67567e-16	30.7525
Ahnak	-0.759319	2.79115	1.22432e-18	8.38905e-17	31.4846
Tcirg1	-0.759982	1.69813	4.14476e-16	2.24092e-14	25.7647
Cops9	-0.76122	3.92354	5.86022e-19	4.22455e-17	32.2089
Slc16a11	-0.763284	1.32997	1.74133e-16	9.6023e-15	26.6156
Dlst	-0.771011	2.23521	1.26988e-15	6.6549e-14	24.6666
Cd81	-0.780867	3.49809	1.66746e-24	2.06066e-22	44.7825
Scx	-0.784181	1.47241	1.18491e-11	3.75293e-10	15.7257
Msrb1	-0.78524	2.47801	1.90084e-14	8.65443e-13	22.0151
Rpp25	-0.78546	1.77077	8.24862e-12	2.70543e-10	16.0789
Rhof	-0.786715	1.31324	1.5613e-15	7.97414e-14	24.4641
S100b	-0.787875	1.36182	5.34505e-15	2.56878e-13	23.2579
Sat1	-0.794184	2.67961	8.30502e-19	5.83502e-17	31.8661
Ucp2	-0.797871	2.55038	1.63352e-28	2.56926e-26	53.8888
Gpr176	-0.799205	1.06379	2.50006e-19	1.84061e-17	33.0465
Snap91	-0.806851	1.02391	1.48837e-18	9.95196e-17	31.2926
Hpx	-0.807406	1.65329	1.49003e-15	7.66672e-14	24.5099
Mxra8	-0.814615	1.99266	8.71211e-17	4.94198e-15	27.2953
Laptm4b	-0.817835	2.99016	1.17964e-30	2.33248e-28	58.757
Pla2g1b	-0.81959	2.59336	6.73562e-11	1.87581e-09	14.0324
Serinc3	-0.824666	2.12471	4.57218e-23	4.95039e-21	41.519
Fam20a	-0.830575	1.25246	4.2384e-15	2.08768e-13	23.4852
Emc4	-0.831646	2.52283	1.91021e-17	1.14953e-15	28.7852
Pdlim4	-0.854431	2.07228	1.38268e-18	9.29014e-17	31.365
Epdr1	-0.855944	1.14711	2.29269e-22	2.28296e-20	39.9306
Aldh3b1	-0.856575	2.12649	3.1523e-17	1.88065e-15	28.2933
Tango2	-0.856613	1.41188	1.91952e-19	1.43611e-17	33.3064
Acsl3	-0.862542	1.46054	5.33017e-18	3.36872e-16	30.039
Nudt4	-0.871828	3.10911	1.11302e-20	9.45109e-19	36.1079
Cpt2	-0.879502	1.87794	8.41122e-18	5.26786e-16	29.5908
Cisd1	-0.879702	2.23693	4.86481e-19	3.56264e-17	32.3919
Sfrp4	-0.880636	1.35943	2.00199e-14	9.05538e-13	21.9643
Gpx1	-0.90034	4.00077	2.92684e-22	2.87307e-20	39.6901
Map1b	-0.907041	1.57231	2.72573e-22	2.69478e-20	39.7602
Gm2a	-0.914389	4.45913	1.81989e-29	3.27131e-27	56.0552
Ctsd	-0.919221	4.70671	1.84326e-28	2.86657e-26	53.7695
Sptlc1	-0.926268	1.88203	4.57807e-23	4.95039e-21	41.5177
Calml3	-0.931076	1.55273	1.55795e-20	1.31485e-18	35.777
Dag1	-0.934269	3.24664	6.62596e-30	1.2563e-27	57.0528
Osgin1	-0.935051	3.45571	4.15348e-21	3.6385e-19	37.0781
Scd2	-0.947	4.45705	4.54451e-37	1.3674e-34	73.3517
Rcan1	-0.952943	1.81091	9.97844e-23	1.03068e-20	40.7501
Ostf1	-0.966295	2.47161	5.17859e-20	4.09582e-18	34.5951
Hsd17b7	-0.979806	1.9878	8.77694e-18	5.44761e-16	29.549
Prdx5	-0.982706	3.60738	1.97913e-24	2.42417e-22	44.6136
Ggt1	-0.990998	1.29888	2.9033e-23	3.18925e-21	41.9665
Gstt3	-0.99345	4.21542	1.18604e-24	1.50605e-22	45.1184
Lrp11	-1.00644	1.86156	2.02361e-20	1.68728e-18	35.5196
Ctsa	-1.00726	4.35732	1.34915e-18	9.10907e-17	31.3892
Stom	-1.01768	2.904	2.094e-31	4.52861e-29	60.4644
AC134224.3	-1.02701	3.65994	7.22057e-22	6.7527e-20	38.8008
Plscr1	-1.05189	1.44626	4.31169e-24	5.05746e-22	43.846
Sucla2	-1.05804	2.59921	1.36338e-23	1.52181e-21	42.7113
Ptk2b	-1.09251	2.16616	1.2009e-25	1.62958e-23	47.3766
Cdkn2b	-1.11571	1.7067	4.00575e-20	3.20483e-18	34.8477
Gstt1	-1.11578	3.28998	8.42053e-29	1.42132e-26	54.5429
Fuca1	-1.11606	4.65273	8.54257e-25	1.10503e-22	45.4419
Vtcn1	-1.12473	1.60758	1.28985e-23	1.45145e-21	42.766
LOC108348086	-1.1351	2.07229	2.97155e-13	1.20549e-11	19.3248
Rgcc	-1.16456	2.23104	3.9446e-21	3.47753e-19	37.1289
Creg1	-1.16476	2.95988	1.79936e-27	2.56751e-25	51.5208
Sord	-1.16831	3.14617	3.33927e-22	3.20964e-20	39.5602
Prss23	-1.16919	2.70343	1.28303e-21	1.17606e-19	38.2347
Ctsh	-1.18414	3.92487	1.74923e-33	4.56814e-31	65.1918
Anxa5	-1.18583	4.71499	9.69165e-33	2.2736e-30	63.5001
Ppcdc	-1.19936	2.28606	1.71452e-27	2.47195e-25	51.5685
Gpc1	-1.20142	2.4856	2.05738e-31	4.52004e-29	60.4818
Scgb1a1	-1.2156	3.00025	1.06846e-23	1.21218e-21	42.9516
Rln1	-1.21955	5.43455	2.96673e-18	1.90988e-16	30.6147
Rhbg	-1.24491	3.33111	1.67503e-29	3.05054e-27	56.1371
Idh1	-1.27128	4.35762	1.55068e-28	2.46701e-26	53.9401
Hp	-1.27226	2.83626	4.20017e-21	3.65626e-19	37.0671
Podnl1	-1.29877	2.35943	5.41956e-22	5.13781e-20	39.0833
Avpi1	-1.31769	3.33728	3.1842e-36	8.9944e-34	71.427
Dmkn	-1.33222	2.87312	4.58735e-24	5.33559e-22	43.7849
Slc51a	-1.34215	2.49082	5.71709e-23	6.08694e-21	41.2988
Bcat1	-1.383	2.96554	1.57634e-33	4.19579e-31	65.2946
Fabp6	-1.39827	5.10736	1.08771e-30	2.18189e-28	58.8371
Gadd45a	-1.4059	3.40482	4.6006e-31	9.50401e-29	59.687
Dhfr	-1.40595	2.7992	2.5996e-29	4.61296e-27	55.7032
Sdc1	-1.43464	2.90869	2.35265e-31	5.00969e-29	60.3494
Mfge8	-1.44622	5.72881	4.73168e-38	1.52305e-35	75.5885
Akr1c3	-1.64181	6.39936	4.04841e-28	6.15758e-26	52.993

## Sheet: GO-2
Term	Count	%	PValue	Genes	List Total	Pop Hits	Pop Total	Fold Enrichment	Bonferroni	Benjamini	FDR
response to drug	16	17.9775	3.78635e-08	COL18A1, EGR1, IGFBP2, WFDC1, ECE1, ASS1, CYP17A1, CST3, NPPC, FABP3, MAT2A, MDK, ALDH1A1, LCN2, TIMP2, JUNB	87	528	17535	6.10763	2.78672e-05	2.78675e-05	2.77161e-05
male gonad development	8	8.98876	7.792e-06	CST3, AMHR2, WT1, TSX, INSL3, INHA, CYP17A1, BOK	87	147	17535	10.9688	0.00571852	0.00286746	0.00285187
cellular response to cAMP	6	6.74157	3.77734e-05	EGR1, TF, IGFBP5, WT1, PENK, ASS1	87	77	17535	15.7053	0.0274188	0.00926707	0.00921671
response to estradiol	7	7.86517	0.000462278	CST3, DHH, PENK, ALDH1A1, IGFBP2, WFDC1, ASS1	87	201	17535	7.01921	0.288454	0.0816406	0.0811969
regulation of insulin-like growth factor receptor signaling pathway	3	3.37079	0.00065307	IGFBP5, IGFBP2, IGFBP6	87	8	17535	75.5819	0.381722	0.0816406	0.0811969
cellular response to gonadotropin stimulus	3	3.37079	0.00272839	EGR1, WT1, CYP17A1	87	16	17535	37.7909	0.866124	0.205368	0.204252
aging	7	7.86517	0.00452398	IGFBP5, PENK, IGFBP2, TIMP2, CLU, ASS1, DCN	87	315	17535	4.47893	0.964464	0.256127	0.254735
estrous cycle	3	3.37079	0.0107189	EGR1, ALDH1A1, CLU	87	32	17535	18.8955	0.999641	0.49307	0.49039
adrenal gland development	3	3.37079	0.0127369	WT1, MDK, CYP17A1	87	35	17535	17.2759	0.99992	0.49348	0.490798
response to follicle-stimulating hormone	2	2.24719	0.033836	EGR1, ASNS	87	7	17535	57.5862	1	0.805408	0.801031

## Sheet: GO-3
Term	Count	%	PValue	Genes	List Total	Pop Hits	Pop Total	Fold Enrichment	Bonferroni	Benjamini	FDR
oxidation-reduction process	51	9.94152	8.71883e-12	TXN1, ALDH1L1, NDUFA12, LOC681458, CYP46A1, TXN2, AKR1B7, AIFM2, SCD2, UQCRFS1, ACADS, ACAD10, BCKDHA, G6PD, GPX1, GLRX3, GLRX5, SORD, HADHB, CYP27A1, ETHE1, NDUFS2, NDUFB7, RETSAT, CTBP2, MAOA, MGST1, GLRX, HSD17B8, PRDX3, PRDX5, CYP11A1, ALDH3B1, CREG1, PNPO, NDUFV3, PDHA1, HSD3B3, TXNRD1, OSGIN1, AKR1C3, SOD3, PRDX6, DHRS4, SOD1, QDPR, DHFR, SCD, IMPDH1, DHCR7, MSRB1	460	651	17535	2.98633	2.02974e-08	2.02974e-08	2.01056e-08
response to oxidative stress	19	3.7037	5.21128e-08	G6PD, GPX1, NDUFA12, TXNRD1, PON2, IDH1, ETFDH, PARK7, SOD3, TXN2, SOD1, PRDX3, RCAN1, PRDX5, PINK1, CAT, HMOX1, NDUFS2, MSRB1	460	146	17535	4.96077	0.000121311	6.06593e-05	6.00861e-05
fatty acid beta-oxidation	11	2.14425	2.39956e-07	HADHB, HADHA, ACADVL, CPT1A, ACAA2, CPT2, ACOX1, ECI2, HSD17B4, ACADS, DECR1	460	46	17535	9.11555	0.000558461	0.000186206	0.000184446
response to drug	36	7.01754	4.99548e-07	TXN1, ALAS1, RPN2, FECH, EI24, MGST1, HSD17B4, GSTT1, PARK7, SRP14, TXN2, PNP, CYP11A1, SMPD1, STAT4, KDR, PTK2B, UQCRFS1, ABCB1B, JUN, CPT1A, GK, ACSL1, TXNRD1, NDUFA10L1, SORD, SRP68, SOD1, NME1, HADHA, GNPAT, STAR, MAP1B, SCGB1A1, HMBS, CAT	460	528	17535	2.59906	0.00116227	0.000290737	0.00028799
cell redox homeostasis	12	2.33918	7.46805e-07	PRDX3, TXN1, PRDX5, GPX1, GLRX3, TXNRD1, GLRX5, GLRX, P4HB, PRDX6, DLD, TXN2	460	64	17535	7.14742	0.00173705	0.000315814	0.000312829
response to hydrogen peroxide	13	2.53411	8.13953e-07	JUN, GPX1, DUSP1, PARK7, SOD1, PRDX3, STAR, CYP11A1, CAT, STAT4, SDC1, HMOX1, PTK2B	460	78	17535	6.35326	0.00189309	0.000315814	0.000312829
tricarboxylic acid cycle	8	1.55945	7.61985e-06	PDHA1, SUCLA2, IDH1, DLST, SUCLG1, ACO1, ACO2, SDHB	460	29	17535	10.5157	0.0175827	0.00253414	0.00251019
cellular oxidant detoxification	11	2.14425	1.169e-05	PRDX3, TXN1, PRDX5, GPX1, TXNRD1, CAT, MGST1, MGST2, GSTT1, PARK7, PRDX6	460	69	17535	6.07703	0.0268475	0.00340179	0.00336964
response to organic cyclic compound	21	4.09357	3.40892e-05	JUN, CDKN2B, G6PD, CPT1A, ALAS1, GPX1, ACSL1, IDH1, HSD17B4, GSTT1, ACSL3, TXN2, STS, STAR, CYP11A1, HMBS, STAT4, ACP5, ANXA7, ABCB1B, CTSB	460	272	17535	2.94305	0.0762937	0.00816494	0.00808778
cellular response to oxidative stress	11	2.14425	3.50727e-05	PRDX3, TXN1, G6PD, PINK1, ALDH3B1, LONP1, PARK7, GGT1, NFE2L1, SOD1, TXN2	460	78	17535	5.37584	0.0784063	0.00816494	0.00808778

## Sheet: GO-6
Term	Count	%	PValue	Genes	List Total	Pop Hits	Pop Total	Fold Enrichment	Bonferroni	Benjamini	FDR
oxidation-reduction process	23	18.1102	1.76658e-10	BCKDHA, CYB5A, RETSAT, HSD3B3, GLRX5, AKR1C3, CYBB, MSMO1, DHCR24, HSD17B7, CYP19A1, DHRS3, PRDX3, DHFR, SQLE, PRDX5, CYP11A1, CREG1, ALDH3B1, ME1, SCD2, DHCR7, ACADS	115	651	17535	5.3871	1.65175e-07	1.65175e-07	1.63585e-07
response to organic cyclic compound	13	10.2362	2.06567e-07	ORM1, IDH1, HP, GSTT1, ACSL3, HSD17B7, CYP19A1, ACAT1, CYP11A1, ACP5, HMGCS2, ABCB1B, PTGES	115	272	17535	7.28756	0.000193122	8.40627e-05	8.32535e-05
response to nutrient	10	7.87402	2.6972e-07	BCKDHA, HMGCL, CYP11A1, OXCT1, AKR1C3, CYBB, HMGCS2, ACSL3, A2M, ARSB	115	137	17535	11.1298	0.000252156	8.40627e-05	8.32535e-05
response to starvation	7	5.51181	1.1838e-06	HMGCL, OXCT1, HP, HMGCS2, ACADS, ACAT1, LRP11	115	53	17535	20.1386	0.00110624	0.000276714	0.00027405
response to glucocorticoid	8	6.29921	2.58462e-05	C1QB, BCKDHA, SFRP4, HP, SDC1, HMGCS2, A2M, ACADS	115	133	17535	9.17162	0.0238769	0.00483325	0.00478672
cholesterol biosynthetic process	4	3.14961	0.000623924	DHCR24, HMGCS2, DHCR7, HSD17B7	115	26	17535	23.4582	0.442086	0.0816492	0.0808633
response to drug	12	9.44882	0.000652773	ORM1, CYP11A1, OXCT1, HP, KDR, CYBB, GSTT1, HMGCS2, HSD17B7, SRP14, ABCB1B, CYP19A1	115	528	17535	3.46542	0.456943	0.0816492	0.0808633
cellular response to follicle-stimulating hormone stimulus	4	3.14961	0.000698603	CYP11A1, AKR1C3, SCX, CYP19A1	115	27	17535	22.5894	0.479738	0.0816492	0.0808633
testosterone biosynthetic process	3	2.3622	0.000861306	CYP11A1, AKR1C3, CYP19A1	115	7	17535	65.3478	0.553211	0.0894802	0.0886189
acute-phase response	4	3.14961	0.00191287	PLSCR1, ORM1, HP, A2M	115	38	17535	16.0503	0.833082	0.178854	0.177132

## Sheet: GO-9
Term	Count	%	PValue	Genes	List Total	Pop Hits	Pop Total	Fold Enrichment	Bonferroni	Benjamini	FDR
translation	22	17.3228	9.8081e-14	LOC103694404, RPL32, LOC684988, RPL12, RPL34, LOC100360057, RPS3A, RPL6, RPS15A, RPS19, RPL36, RPL13, RPS20, RPL37, RPS2, BCO2, RPL26, RPL17, SLC25A25, RPS24, RPS23	120	378	17535	8.50463	1.05091e-10	1.05143e-10	1.02789e-10
cellular response to cAMP	8	6.29921	9.01172e-07	EGR1, IGFBP5, LOC100360522, FDX1, SERPINE1, IL18, CYP1B1, ASS1	120	77	17535	15.1818	0.00096559	0.000483028	0.000472214
aging	12	9.44882	9.93316e-06	HSPA8, GSTA5, IGFBP5, IGFBP2, TIMP2, PEBP1, IGF1, SOD2, GCLM, LDLR, ASS1, DCN	120	315	17535	5.56667	0.0105919	0.00354945	0.00346998
retinal metabolic process	4	3.14961	0.000130647	RBP4, AKR1B10, CYP1B1, BCO2	120	15	17535	38.9667	0.130696	0.0334848	0.0327352
osteoblast differentiation	7	5.51181	0.000160003	GJA1, IGFBP5, CREB3L1, IL18, IGF1, HSPE1, JUNB	120	119	17535	8.59559	0.15763	0.0334848	0.0327352
ribosomal small subunit assembly	5	3.93701	0.000202828	RPS25, RPS10L1, RPS19, RPS2	120	43	17535	16.9913	0.195435	0.0334848	0.0327352
response to steroid hormone	5	3.93701	0.000780813	IGFBP2, CYP1B1, IGF1, ASS1, CYP17A1	120	61	17535	11.9775	0.567148	0.0697526	0.068191
response to follicle-stimulating hormone	3	2.3622	0.000937971	EGR1, CYP1B1, ASNS	120	7	17535	62.625	0.634313	0.0711561	0.0695631
adrenal gland development	4	3.14961	0.00170239	CITED2, FDX1, CYP1B1, CYP17A1	120	35	17535	16.7	0.839027	0.107351	0.104947
male gonad development	6	4.72441	0.00328622	RBP4, CITED2, CYP1B1, INSL3, INHA, CYP17A1	120	147	17535	5.96429	0.970655	0.130475	0.127554

## Sheet: DEG C2-9 vs C3-6
Tag	logFC	AveExpr	P.Value	adj.P.Val	B
Mfge8	-2.17605	5.72881	2.39167297838831e-319	3.31031456938725e-315	721.237
Akr1c3	-2.82109	6.39936	4.33506e-298	3.00008e-294	672.444
Fabp6	-2.29064	5.10736	2.10166e-292	9.69635e-289	659.391
Ctsh	-1.83639	3.92487	1.05561e-277	3.65268e-274	625.636
Avpi1	-1.94705	3.33728	2.52256e-266	6.98296e-263	599.505
Gadd45a	-2.23135	3.40482	9.52441e-263	2.19712e-259	591.29
Idh1	-2.09737	4.35762	2.20109e-259	4.35218e-256	583.563
Bcat1	-2.10607	2.96554	1.19826e-258	2.07315e-255	581.873
Dhfr	-2.28199	2.7992	2.50012e-256	3.84491e-253	576.546
Sdc1	-2.24094	2.90869	2.59869e-251	3.59685e-248	565.022
Anxa5	-1.81134	4.71499	3.54354e-250	4.45874e-247	562.415
Prdx5	-1.73588	3.60738	8.67701e-250	1.00082e-246	561.522
Acsbg1	2.04563	1.90311	2.17899e-224	2.31995e-221	503.166
Ctsd	-1.44424	4.70671	1.52895e-215	1.51159e-212	482.839
Slc51a	-2.33193	2.49082	4.30061e-210	3.96832e-207	470.318
Creg1	-1.83784	2.95988	6.85948e-206	5.93388e-203	460.659
Cops9	-1.45164	3.92354	7.76612e-206	6.323e-203	460.536
Lipg	-1.63788	3.35838	1.46921e-203	1.12974e-200	455.303
Fdxr	-1.54717	4.58559	1.1022e-202	8.02924e-200	453.292
Acaa2	-1.49422	3.98497	7.65683e-202	5.29891e-199	451.357
Rhbg	-1.88424	3.33111	1.09506e-201	7.21749e-199	451
Dmkn	-2.22426	2.87312	5.31238e-199	3.34221e-196	444.828
Gstt3	-1.63783	4.21542	9.90062e-199	5.95802e-196	444.206
Ostf1	-1.76706	2.47161	1.29142e-196	7.44774e-194	439.345
Pgam1	-1.21868	4.2912	1.67934e-193	9.29749e-191	432.188
Ppcdc	-1.85657	2.28606	1.81987e-193	9.68802e-191	432.108
Gstt1	-1.68146	3.28998	3.54998e-191	1.81982e-188	426.844
Podnl1	-2.24034	2.35943	1.67164e-190	8.13743e-188	425.298
Vtcn1	-1.87075	1.60758	1.70497e-190	8.13743e-188	425.278
Sord	-2	3.14617	7.95122e-189	3.66843e-186	421.443
Dnajc15	-1.43444	3.31203	3.7902e-187	1.69226e-184	417.586
Ptk2b	-1.72747	2.16616	3.65999e-185	1.58306e-182	413.024
Gpc1	-1.71215	2.4856	2.18059e-183	9.14592e-181	408.944
Rgcc	-2.02608	2.23104	2.59646e-183	1.05699e-180	408.77
Scd2	-1.24435	4.45705	5.50893e-183	2.17854e-180	408.019
Prdx3	-1.392	3.99985	6.82815e-183	2.62523e-180	407.805
Gm2a	-1.34253	4.45913	2.23961e-182	8.37797e-180	406.619
Ghitm	-1.51656	3.08211	5.32319e-182	1.9389e-179	405.755
Cst12	2.44981	1.71107	2.1702e-181	7.70199e-179	404.352
Ftl1	-0.990438	5.32312	1.4284e-180	4.9426e-178	402.471
Klhdc8a	-1.59301	3.75299	1.21004e-177	4.08491e-175	395.742
Cldn11	1.90661	1.68168	1.48834e-177	4.90479e-175	395.535
Inha	1.18611	5.05408	4.30863e-177	1.38688e-174	394.474
Msrb1	-1.64934	2.47801	2.575e-176	8.10012e-174	392.689
Tmem184a	2.02228	1.68452	4.02902e-174	1.23924e-171	387.646
Pgk1	-1.55061	3.73567	3.60983e-173	1.08617e-170	385.457
Ctsa	-1.83741	4.35732	9.78133e-173	2.8805e-170	384.462
Tsx	2.31371	1.52386	7.50673e-169	2.1646e-166	375.532
Sucla2	-1.69266	2.59921	2.28661e-168	6.44004e-166	374.42
Decr1	-1.56076	2.63424	2.32644e-168	6.44004e-166	374.403
Cyp17a1	2.21642	1.65194	3.4382e-168	9.33101e-166	374.013
Atp6v0e1	-1.29887	3.23731	1.26928e-166	3.37849e-164	370.411
Bex3	1.74994	2.2314	1.67334e-165	4.36995e-163	367.837
Calml3	-1.58443	1.55273	1.30236e-163	3.33814e-161	363.49
Osgin1	-1.55649	3.45571	7.49535e-160	1.88624e-157	354.847
Fkbp1a	-1.17263	3.39789	9.60174e-160	2.37317e-157	354.6
Emc4	-1.52821	2.52283	1.44729e-159	3.51438e-157	354.19
Srp14	-1.35421	2.49333	1.08881e-158	2.59831e-156	352.176
Cpt2	-1.59576	1.87794	1.31892e-158	3.09411e-156	351.985
Plscr1	-1.63179	1.44626	1.635e-158	3.77167e-156	351.77
Prss23	-1.91264	2.70343	1.87424e-157	4.25269e-155	349.335
Fabp3	1.99284	1.83053	3.2537e-157	7.26363e-155	348.785
Plbd1	-1.60593	2.70654	2.16059e-155	4.74678e-153	344.596
Nudt4	-1.45166	3.10911	4.4955e-155	9.72223e-153	343.865
Smpd1	-1.38705	2.79618	7.36089e-155	1.56742e-152	343.373
Ass1	1.94093	1.81388	1.91969e-151	4.02583e-149	335.52
Hsd3b3	-1.66653	2.15905	2.84799e-151	5.88344e-149	335.127
Cyp11a1	-0.952392	7.3052	6.75294e-151	1.37452e-148	334.265
Cisd1	-1.5146	2.23693	7.61657e-151	1.52784e-148	334.145
Ctsb	-0.870606	4.43173	1.37097e-150	2.7108e-148	333.558
Dlst	-1.47154	2.23521	3.65723e-150	7.12954e-148	332.578
Lrp11	-1.66666	1.86156	9.32301e-150	1.79222e-147	331.644
Uqcrb	-1.35549	3.02998	1.7723e-149	3.36033e-147	331.003
Fuca1	-1.66293	4.65273	4.40262e-147	8.23468e-145	325.498
Atp6ap2	-1.41789	1.95244	1.49949e-146	2.76726e-144	324.274
Cdkn2b	-1.84747	1.7067	1.67683e-146	3.05382e-144	324.163
Dhcr7	-1.35674	3.2638	6.549e-146	1.1772e-143	322.803
Scarb1	-0.771926	7.05251	9.4148e-145	1.67064e-142	320.142
Ggt1	-1.51247	1.29888	1.26244e-143	2.20063e-141	317.551
Cd81	-1.1607	3.49809	1.27195e-143	2.20063e-141	317.543
Fam20a	-1.58892	1.25246	1.8225e-143	3.11423e-141	317.184
Stom	-1.33456	2.904	5.10065e-143	8.60953e-141	316.157
Gpx1	-1.40221	4.00077	1.07296e-142	1.78926e-140	315.415
Snap91	-1.37853	1.02391	5.57455e-142	9.18541e-140	313.77
Timp2	1.50921	2.41457	1.25155e-140	2.03796e-138	310.664
Gpr176	-1.3312	1.06379	2.24005e-140	3.60517e-138	310.083
Ubc	-0.773229	4.79576	5.47841e-140	8.71571e-138	309.19
Scgb1a1	-1.81583	3.00025	7.9621e-139	1.25231e-136	306.518
Aard	1.85256	1.17695	1.00484e-137	1.56269e-135	303.988
Enc1	1.60281	1.57304	7.00159e-136	1.07677e-133	299.751
Acsl3	-1.47184	1.46054	2.49646e-135	3.79709e-133	298.482
Tagln	1.72401	2.42341	3.34685e-134	5.0352e-132	295.891
Sptlc1	-1.38511	1.88203	5.15281e-134	7.66883e-132	295.461
LOC103694892	1.9467	3.70793	2.58718e-133	3.80949e-131	293.85
Tango2	-1.39573	1.41188	3.55673e-133	5.18197e-131	293.532
RT1-CE10	-1.24448	4.08459	2.72681e-132	3.93143e-130	291.499
Ei24	-1.50051	1.65451	6.20553e-131	8.85472e-129	288.38
Reep5	-1.22637	3.47803	6.90324e-131	9.74977e-129	288.273
Gstm6	1.78212	1.49274	6.21247e-130	8.68553e-128	286.08
Akr1b10	1.89304	1.13582	8.0395e-127	1.11275e-124	278.928
Tmem59	-1.22205	2.58358	3.31973e-126	4.54934e-124	277.512
Aldh3b1	-1.45649	2.12649	8.03441e-126	1.09024e-123	276.63
Star	-1.33501	3.77293	4.13022e-125	5.55014e-123	274.996
Tceal9	1.3218	2.34569	6.87715e-125	9.15256e-123	274.487
Xpnpep2	-1.19281	0.948148	9.64814e-124	1.27181e-121	271.851
Epdr1	-1.26233	1.14711	1.20202e-123	1.56954e-121	271.631
Cd74	-1.37002	3.72894	1.29334e-123	1.67301e-121	271.558
Bok	1.4467	1.79459	3.66345e-123	4.69498e-121	270.519
Plpp1	-1.33809	1.05051	8.01947e-123	1.01833e-120	269.737
Serf1	-1.11374	0.86081	3.37936e-122	4.25215e-120	268.301
Slc16a11	-1.31373	1.32997	4.30464e-122	5.36761e-120	268.06
Ptgfr	-1.17718	0.836343	8.32371e-122	1.02865e-119	267.402
Suclg1	-1.23981	2.69686	1.06647e-121	1.30629e-119	267.154
Serinc3	-1.18982	2.12471	1.27275e-121	1.54528e-119	266.978
LOC100911664	-1.03731	3.08766	2.68017e-121	3.22576e-119	266.234
Iscu	-1.17099	3.02048	5.67788e-121	6.77479e-119	265.485
Mmd2	1.38845	2.16847	1.02234e-120	1.20941e-118	264.898
Rhof	-1.38748	1.31324	1.02703e-119	1.20467e-117	262.595
Aldh1l1	-1.18896	0.88083	1.74753e-117	2.03257e-115	257.468
Cmbl	-1.20562	1.14567	1.31394e-116	1.51551e-114	255.455
Laptm4b	-1.00483	2.99016	5.76467e-116	6.59411e-114	253.979
Mxra8	-1.36159	1.99266	6.84165e-116	7.7619e-114	253.808
Hadhb	-1.16262	2.33712	1.26968e-115	1.42875e-113	253.191
S100b	-1.39513	1.36182	3.84668e-115	4.2937e-113	252.084
Hpx	-1.40192	1.65329	4.19365e-115	4.64355e-113	251.998
Dag1	-1.15686	3.24664	1.25731e-114	1.38115e-112	250.902
LOC108348086	-2.1333	2.07229	7.06417e-113	7.69883e-111	246.881
G6pd	-1.30013	2.16692	1.26484e-112	1.36771e-110	246.3
Plet1	1.70378	1.7002	3.36608e-112	3.61162e-110	245.323
Insl3	1.68911	1.63867	2.1739e-110	2.31453e-108	241.163
Rpp25	-1.55862	1.77077	3.46349e-110	3.6594e-108	240.699
Enah	-1.1128	0.936948	5.69225e-110	5.96867e-108	240.203
Ndfip1	-1.00503	3.26836	3.02905e-109	3.15226e-107	238.534
Slc25a39	-1.29009	2.29536	1.04325e-108	1.07758e-106	237.3
Pdlim4	-1.3101	2.07228	1.62372e-106	1.66474e-104	232.263
Aco2	-1.10291	2.39859	2.9371e-106	2.98915e-104	231.671
Fam19a5	-1.24479	0.965785	8.09181e-106	8.17509e-104	230.66
Sat1	-1.20574	2.67961	1.61488e-105	1.61967e-103	229.97
Gpihbp1	-1.08627	0.809331	5.02359e-105	5.00226e-103	228.838
Hes6	-1.38392	2.09439	1.39536e-104	1.37951e-102	227.818
Sqstm1	-0.925902	3.21962	7.54271e-104	7.40416e-102	226.134
Myl9	1.19652	2.92412	9.53254e-104	9.29155e-102	225.9
Acp5	-1.22001	1.34985	2.8033e-103	2.71332e-101	224.824
Rcan1	-1.30056	1.81091	3.13483e-103	3.01313e-101	224.712
Rab11a	-1.06344	2.67536	3.57474e-103	3.41227e-101	224.581
Arsb	-1.15639	1.77086	3.98753e-103	3.78023e-101	224.472
Dld	-1.12962	2.37684	4.58068e-103	4.31301e-101	224.334
Minos1	-1.00097	3.32179	4.6347e-103	4.33438e-101	224.322
Atp5f1b	-0.739214	4.88413	2.54556e-102	2.36464e-100	222.622
Atp6v1g1	-0.991605	3.33422	1.41784e-101	1.30829e-99	220.908
AC128207.1	1.07814	0.690845	4.51129e-101	4.13515e-99	219.753
Mat2a	1.2083	2.69477	1.44436e-100	1.31522e-98	218.592
Dusp1	-1.18872	1.82132	1.46199e-100	1.32257e-98	218.58
Phka1	-1.12098	1.01102	1.76022e-100	1.58202e-98	218.395
App	-0.81703	4.15565	2.05774e-100	1.8375e-98	218.239
Vmp1	-1.14344	2.27548	7.25744e-100	6.43911e-98	216.981
Vps33a	-1.09341	1.00565	1.8295e-99	1.61287e-97	216.059
LOC100910200	-1.17543	2.16325	3.09108e-99	2.70783e-97	215.535
Rps10l1	0.952618	3.83618	3.28714e-99	2.86147e-97	215.474
Copz2	-1.21974	1.47312	6.45954e-99	5.5879e-97	214.8
Tmem86a	-1.24191	2.89188	6.82456e-99	5.867e-97	214.745
AC133739.1	-1.00277	0.74965	1.34624e-98	1.15021e-96	214.067
Ndufs5	-0.981192	2.89867	1.09623e-97	9.30852e-96	211.974
Retsat	-1.09648	2.55671	1.1321e-97	9.55454e-96	211.942
Vegfa	-1.16282	1.93269	1.14518e-97	9.60632e-96	211.931
Mpc2	-0.999277	0.834642	2.2446e-97	1.87153e-95	211.259
Nppc	1.6317	1.35644	1.02091e-96	8.46136e-95	209.748
Hp	-1.75618	2.83626	1.55865e-96	1.28412e-94	209.325
Gulp1	-1.11084	1.18259	1.32667e-95	1.08653e-93	207.189
Mrps12	-1.15442	2.04056	1.42992e-95	1.16421e-93	207.114
Tspan12	-0.929843	0.722114	3.38155e-95	2.73708e-93	206.255
Acsl1	-1.11935	1.03025	4.5369e-95	3.65089e-93	205.962
Gch1	-1.13815	1.19011	1.56972e-94	1.25586e-92	204.723
Dusp14	-1.10736	1.61156	1.66748e-94	1.32641e-92	204.663
Tcta	-1.18667	1.33129	1.74319e-94	1.37871e-92	204.619
Asah1	-1.1385	2.06469	4.45006e-94	3.49962e-92	203.683
Syt13	-1.20614	1.69871	5.50206e-94	4.30248e-92	203.472
Rpl36	0.887508	3.99797	6.2389e-94	4.85127e-92	203.346
Cd47	-1.226	1.65457	8.1262e-94	6.28351e-92	203.083
Mocs2	-1.16954	1.45678	9.40136e-94	7.22912e-92	202.937
Vipr2	-0.988666	0.799953	4.13261e-93	3.16019e-91	201.46
Chst12	-0.956213	0.730637	4.34714e-93	3.30598e-91	201.409
S100a4	-1.18586	1.2036	6.37943e-93	4.81485e-91	201.027
Abcb1b	-1.24687	1.27981	6.40079e-93	4.81485e-91	201.023
Egr1	1.26282	1.93244	7.08532e-93	5.30097e-91	200.922
Dbp	-1.33101	2.57294	1.19131e-92	8.86502e-91	200.403
Entpd5	-1.13016	1.44282	1.2272e-92	9.08326e-91	200.374
Hadha	-0.979239	3.04642	1.28868e-92	9.48758e-91	200.325
Fam167b	-1.09785	0.995675	3.01463e-92	2.2077e-90	199.477
Sec14l1	-1.14421	1.8989	3.12266e-92	2.27478e-90	199.442
Akr1b7	-1.1319	0.884559	4.9942e-92	3.61909e-90	198.973
LOC100364435	0.83624	5.13085	1.06009e-91	7.64207e-90	198.222
Ctnnbl1	-1.0816	1.13661	1.43168e-91	1.02673e-89	197.923
Gstm7	1.2633	1.95489	1.61683e-91	1.15353e-89	197.801
Dcn	1.21828	2.08684	2.17248e-91	1.54202e-89	197.507
Acot9	-1.11993	1.23896	3.15172e-91	2.22566e-89	197.135
RGD1305464	-1.053	2.29946	5.33644e-91	3.74932e-89	196.61
Reep2	1.15266	0.966567	6.26842e-91	4.38188e-89	196.449
Dhcr24	-1.08753	3.0467	7.76395e-91	5.40004e-89	196.236
Sptan1	-0.992535	2.78782	7.89513e-91	5.46382e-89	196.219
Cebpd	1.15121	1.34233	9.1321e-91	6.28842e-89	196.074
Map1b	-1.18702	1.57231	1.01018e-90	6.92171e-89	195.973
Taldo1	-1.08915	2.47944	1.03434e-90	7.05235e-89	195.95
RT1-CE4	-0.68537	3.90723	1.1443e-90	7.76383e-89	195.849
Glb1l3	1.09503	0.675318	3.79211e-90	2.56032e-88	194.653
Tmem176b	1.15578	3.0996	6.90969e-90	4.64257e-88	194.055
Igf2r	-1.07787	1.25893	7.66532e-90	5.12539e-88	193.951
Slc25a3	-0.665631	4.25653	1.13451e-89	7.54942e-88	193.56
Tbc1d14	-1.0656	1.15939	1.83399e-89	1.21455e-87	193.081
Cib1	-1.16199	2.15771	1.87855e-89	1.23814e-87	193.057
Ube2ql1	-1.09902	0.910588	6.59476e-89	4.32597e-87	191.804
Fabp5	1.2485	1.93549	9.93072e-89	6.48354e-87	191.396
Gadd45g	1.2518	1.51457	1.7238e-88	1.12014e-86	190.845
Mgst2	-1.26415	2.28142	2.38421e-88	1.54205e-86	190.522
Rln1	-1.74824	5.43455	5.35154e-88	3.44515e-86	189.715
Rab3a	-1.15819	1.42966	5.54896e-88	3.5557e-86	189.679
Vcp	-0.906059	3.43912	6.07399e-88	3.8742e-86	189.589
Glrx5	-1.09797	2.19621	7.27478e-88	4.61882e-86	189.409
Igfbp2	1.27482	2.03121	1.15449e-87	7.29648e-86	188.948
Uqcrfs1	-1.075	2.13898	1.5563e-87	9.79122e-86	188.65
AABR07026294.1	-1.03918	1.51928	2.6375e-87	1.65184e-85	188.124
Lsm1	-1.094	1.72413	2.751e-87	1.71516e-85	188.082
Mt-co1	-0.693309	6.61119	2.98588e-87	1.85325e-85	188
Ethe1	-1.1502	1.63365	4.69507e-87	2.90109e-85	187.548
Farp2	-1.13635	1.12142	4.79142e-87	2.94747e-85	187.528
Tpd52	-1.08075	1.3582	5.92762e-87	3.63027e-85	187.316
Rps27	0.663331	5.36879	6.19596e-87	3.7779e-85	187.272
Ufc1	-0.987161	2.23036	7.5942e-87	4.61014e-85	187.069
Neurl2	-0.970531	0.662723	8.30021e-87	5.01673e-85	186.98
Scp2	-0.959732	2.99763	1.53636e-86	9.24556e-85	186.366
Pla2g16	-1.00889	2.59414	2.31095e-86	1.38467e-84	185.958
Rps2	0.823713	4.40831	4.27577e-86	2.5509e-84	185.345
Dpy19l1	-1.09127	1.20765	6.10225e-86	3.62495e-84	184.99
Cilp2	-0.806885	0.570533	2.1178e-85	1.25267e-83	183.748
Calb2	1.47199	1.9722	6.57736e-85	3.87393e-83	182.618
Dbi	0.965047	3.18014	8.50004e-85	4.98513e-83	182.362
Lamp2	-0.975875	2.23602	6.39351e-84	3.73386e-82	180.349
Nit1	-1.05006	1.97476	1.09305e-83	6.35666e-82	179.814
Atp5if1	-0.856807	3.23499	2.14386e-83	1.24156e-81	179.142
Eif4g2	-0.659055	4.02892	3.34582e-83	1.92956e-81	178.698
Farp1	-0.990229	1.04486	3.72575e-83	2.13975e-81	178.591
Hsd17b7	-1.38939	1.9878	6.28605e-83	3.59526e-81	178.069
RGD1562987	-0.995354	1.86891	1.08486e-82	6.17926e-81	177.525
Nfs1	-1.06001	1.69296	1.10366e-82	6.26053e-81	177.507
Tpt1	0.667428	5.35269	1.4316e-82	8.08769e-81	177.248
Acads	-1.13973	1.82009	1.92583e-82	1.08355e-80	176.952
Ltn1	-1.01369	1.17964	3.3915e-82	1.90048e-80	176.388
Igfbp6	1.18795	1.761	4.13767e-82	2.30925e-80	176.189
Cdk18	-1.13092	1.23965	4.44838e-82	2.47269e-80	176.117
Col18a1	1.01985	2.6066	5.59493e-82	3.09758e-80	175.888
Acss1	-0.9729	1.01505	1.00891e-81	5.56345e-80	175.3
Tmem70	-0.997148	1.12904	1.83949e-81	1.01033e-79	174.701
Kdr	-1.02638	1.17758	2.69655e-81	1.47522e-79	174.319
Serpinb6a	-0.966226	2.10053	3.23469e-81	1.76265e-79	174.138
Mgst1	-1.03033	2.9601	3.97918e-81	2.15983e-79	173.931
Zbtb8os	-1.06259	1.30752	6.77954e-81	3.66545e-79	173.4
Rpn2	-0.888968	2.73518	7.44246e-81	4.00821e-79	173.307
Ccng1	-1.08168	1.34581	1.656e-80	8.88397e-79	172.509
Fuca2	-1.01393	1.27317	2.85303e-80	1.52467e-78	171.966
Aifm2	-0.969635	1.07983	5.55677e-80	2.95813e-78	171.301
Hbs1l	-1.02014	1.2679	5.5785e-80	2.95832e-78	171.297
Arl5a	-0.925443	0.828578	5.95478e-80	3.1458e-78	171.232
Itfg1	-0.984838	1.82035	7.25045e-80	3.81572e-78	171.036
Tns4	-0.9443	0.80747	1.09626e-79	5.7475e-78	170.624
Mrpl33	-1.06384	1.45984	1.21499e-79	6.34593e-78	170.521
Wfdc10a	1.20799	1.25114	2.0786e-79	1.08157e-77	169.985
Park7	-0.817349	3.19904	2.11037e-79	1.09399e-77	169.97
Sod1	-0.697684	3.9065	3.34703e-79	1.72859e-77	169.51
Atp6v1e1	-0.915803	2.51345	5.66168e-79	2.91314e-77	168.986
Lsr	1.05022	1.34455	7.88665e-79	4.04293e-77	168.655
P4hb	-0.725337	3.69832	8.63535e-79	4.4104e-77	168.565
Vnn3	-0.78598	0.557998	1.5059e-78	7.66291e-77	168.01
Tmem176a	0.962868	2.71093	1.701e-78	8.624e-77	167.889
Sin3b	1.05249	2.01602	1.97976e-78	1.00007e-76	167.737
Mapkapk2	0.957246	2.41674	2.20762e-78	1.11112e-76	167.629
Etfa	-1.03083	1.60708	2.39607e-78	1.20159e-76	167.547
Tob1	-1.10769	1.81361	2.62251e-78	1.3104e-76	167.457
Ahnak	-1.02466	2.79115	3.65168e-78	1.81809e-76	167.127
Marcksl1	0.975709	2.19149	3.70699e-78	1.83901e-76	167.112
Tf	1.05294	2.1777	3.84995e-78	1.90311e-76	167.074
Vapa	-0.741522	3.37227	1.18116e-77	5.81793e-76	165.956
Fam91a1	-0.98412	1.99036	1.54134e-77	7.56516e-76	165.69
Cyp1b1	1.08606	3.08442	1.92249e-77	9.40251e-76	165.47
Myh11	1.12209	1.26235	3.09258e-77	1.5072e-75	164.996
Atp5f1c	-0.973962	2.4579	5.29982e-77	2.57385e-75	164.458
Pgrmc1	-0.760138	3.62041	6.97886e-77	3.37743e-75	164.184
Adgrg1	1.10589	1.6706	7.37422e-77	3.55633e-75	164.129
Plekhb2	-0.953886	1.81779	1.04458e-76	5.02016e-75	163.782
Glrx3	-1.04148	2.12628	1.08258e-76	5.18478e-75	163.746
Lrrc8c	-0.989975	1.65809	1.24428e-76	5.93863e-75	163.607
Prdx6	-0.799064	3.09436	2.8036e-76	1.33349e-74	162.797
Rab5if	-0.814056	2.67158	3.57627e-76	1.69518e-74	162.554
Mrap	-0.846825	3.99828	3.8037e-76	1.79683e-74	162.493
Asns	1.15956	1.16492	6.27514e-76	2.95422e-74	161.993
Ttc39a	-0.935972	0.766554	7.68687e-76	3.60658e-74	161.791
Uqcr10	-0.71492	3.7792	8.95295e-76	4.18641e-74	161.639
Akr1a1	-0.749775	3.40712	1.38143e-75	6.43781e-74	161.206
Sgcg	-0.827894	0.618327	1.96423e-75	9.12313e-74	160.855
Slc35f6	-1.00948	1.30065	3.61744e-75	1.67455e-73	160.246
Rpl34	0.722996	4.26089	8.71489e-75	4.02076e-73	159.369
Nfe2l1	-0.87503	0.780545	9.8649e-75	4.53622e-73	159.246
Scd	-0.761845	0.517462	1.2544e-74	5.74907e-73	159.006
Myl12a	-0.806223	3.24636	1.53875e-74	7.02899e-73	158.802
Ttyh1	0.851517	0.523061	1.58022e-74	7.19469e-73	158.776
Cryba4	-0.923445	0.84201	2.05131e-74	9.30892e-73	158.516
Crabp2	-1.11793	2.23206	2.28132e-74	1.03189e-72	158.41
Mtap	-0.916652	0.914723	3.72932e-74	1.68135e-72	157.92
Atp5f1a	-0.857665	3.26995	6.16041e-74	2.76838e-72	157.419
Mtss1	-0.868319	0.842199	8.13977e-74	3.64604e-72	157.141
Nme1	-1.05494	1.86098	9.11464e-74	4.06954e-72	157.028
Col20a1	-1.0222	1.13467	1.04856e-73	4.66659e-72	156.889
Klhl2	-0.97454	1.1546	1.06634e-73	4.7305e-72	156.872
Rab1a	-0.86998	2.16844	1.15651e-73	5.11413e-72	156.791
Defb24	1.15068	0.903238	1.24819e-73	5.50197e-72	156.715
Mdk	1.04871	1.52841	3.47002e-73	1.52471e-71	155.695
Itgb1bp1	-0.919121	1.12649	5.51633e-73	2.41619e-71	155.233
Eral1	-0.775244	0.655318	8.27525e-73	3.61318e-71	154.828
Ypel5	-0.993404	1.88505	1.35402e-72	5.89339e-71	154.337
Tmem50a	-0.928253	1.91852	3.3025e-72	1.43291e-70	153.448
Pnpo	-0.953282	1.15822	4.73621e-72	2.04856e-70	153.089
Cox20	-1.00245	1.2535	4.95088e-72	2.13474e-70	153.044
Sdf4	-0.813139	3.10899	7.0512e-72	3.03092e-70	152.692
Hmgcl	-0.924967	1.2298	9.52506e-72	4.08162e-70	152.392
LOC681458	-1.04281	0.847779	1.24098e-71	5.30134e-70	152.128
Glod4	-0.974535	1.29429	2.36154e-71	1.00573e-69	151.486
Ap2s1	-0.911454	2.33338	2.60177e-71	1.10464e-69	151.39
Clu	0.949496	3.84645	1.54569e-70	6.54249e-69	149.613
Kifc3	-0.965582	1.57758	2.19034e-70	9.24284e-69	149.265
Itgae	-0.934229	1.10567	3.43901e-70	1.44679e-68	148.816
Apmap	-0.947694	1.19147	4.66243e-70	1.95554e-68	148.512
Nmrk1	-0.782565	0.611828	5.12443e-70	2.14282e-68	148.418
Mt3	1.23514	2.04646	3.51619e-69	1.46589e-67	146.497
Gatm	0.944548	0.859059	4.75158e-69	1.97497e-67	146.197
Stat4	-1.04415	1.52478	5.14462e-69	2.13193e-67	146.118
Lcn2	1.04939	1.14959	1.00549e-68	4.15434e-67	145.45
Rangap1	-1.00109	1.86932	1.12839e-68	4.64824e-67	145.335
Sdhb	-0.831942	2.72929	1.14438e-68	4.7001e-67	145.321
Sfrp4	-1.28707	1.35943	1.64243e-68	6.72569e-67	144.961
Gtf2b	-0.93289	1.19929	1.65056e-68	6.73906e-67	144.956
Hagh	1.16456	2.36023	2.22605e-68	9.06198e-67	144.657
Opa1	-0.816154	0.752706	2.37446e-68	9.63782e-67	144.593
Ngly1	-0.842608	0.82833	2.59471e-68	1.0501e-66	144.505
Rps14	0.641316	4.67185	5.12177e-68	2.06678e-66	143.827
Ndufa12	-0.834705	2.67978	8.47626e-68	3.41046e-66	143.324
Pacsin2	-1.00804	1.48322	9.09553e-68	3.64902e-66	143.254
Chn2	-0.825986	0.683184	9.32296e-68	3.72945e-66	143.229
LOC100360522	0.598705	6.13536	1.13965e-67	4.54581e-66	143.029
Tmem147	-0.999488	2.23789	1.16792e-67	4.64518e-66	143.005
Surf4	-0.783598	2.44569	1.35654e-67	5.3799e-66	142.855
Tnc	-1.0636	0.998338	1.45201e-67	5.74208e-66	142.788
Polr3g	-0.736318	0.553602	1.73498e-67	6.84155e-66	142.61
Tcirg1	-1.03844	1.69813	2.86243e-67	1.12554e-65	142.111
Hspa8	0.748334	4.117	3.17644e-67	1.24547e-65	142.007
Pebp1	0.600889	4.59425	3.62264e-67	1.41641e-65	141.876
Runx2	-0.922485	1.07932	4.02939e-67	1.57101e-65	141.77
Tpm2	1.01393	1.94253	6.92598e-67	2.69277e-65	141.23
Atp6v0c	-0.611051	3.87266	7.76376e-67	3.01003e-65	141.116
Rheb	-0.873066	1.91718	9.84274e-67	3.8054e-65	140.88
Wdr45	-0.846628	0.89088	2.39617e-66	9.23825e-65	139.992
Clip1	-0.946941	1.05885	3.38705e-66	1.30223e-64	139.647
Ctps1	-0.870203	1.8049	4.0937e-66	1.56955e-64	139.459
Ndufa4	-0.692803	4.03686	4.77773e-66	1.82675e-64	139.304
Greb1	-0.985339	1.90659	5.37999e-66	2.05136e-64	139.186
Tmem30a	-0.899044	1.31149	6.91989e-66	2.63127e-64	138.935
Cdhr5	-0.783472	0.65465	7.52081e-66	2.85193e-64	138.852
Mtch1	0.7799	2.97894	8.35088e-66	3.15805e-64	138.748
Bnip3	-0.843141	0.928506	1.34817e-65	5.08448e-64	138.27
Gaa	-0.782479	2.83204	1.68999e-65	6.35627e-64	138.045
Wfdc1	0.963019	1.08468	2.21738e-65	8.31728e-64	137.774
Sbsn	-0.905429	0.874853	2.38454e-65	8.9201e-64	137.702
Mt1	-0.94063	5.60962	3.55895e-65	1.32775e-63	137.302
Prkar2b	0.956895	1.63536	3.96505e-65	1.47528e-63	137.195
Lpcat3	-0.919582	2.79317	4.89216e-65	1.81535e-63	136.985
Igf1	1.11365	1.1992	4.95629e-65	1.83422e-63	136.972
Glb1	-0.942733	1.41905	6.25026e-65	2.30693e-63	136.741
Prrx2	-0.748407	0.614625	6.37235e-65	2.34574e-63	136.722
Atp6ap1	-0.86727	1.77387	7.00951e-65	2.57344e-63	136.627
Cat	-0.964383	1.51231	9.23053e-65	3.37989e-63	136.352
Csrp1	0.922121	2.11945	2.61464e-64	9.54862e-63	135.314
Got2	-0.87267	2.29248	3.24034e-64	1.18025e-62	135.101
Rsrp1	-0.801264	2.85106	4.04381e-64	1.46904e-62	134.88
AABR07027872.1	1.19335	1.23429	4.10657e-64	1.48793e-62	134.864
Ywhag	-0.81596	2.63566	4.26413e-64	1.54099e-62	134.827
Igfbp5	1.05488	1.09566	5.65342e-64	2.03773e-62	134.546
Maged2	-0.867317	2.4206	7.3243e-64	2.63313e-62	134.288
Aldh1a1	0.991409	1.19459	9.34544e-64	3.35104e-62	134.045
Pnp	-0.886097	0.922855	1.14254e-63	4.0863e-62	133.844
Ndufa10l1	-0.878877	1.22524	1.2989e-63	4.63352e-62	133.716
Spata6	-0.850464	0.787693	1.56499e-63	5.56839e-62	133.531
Cyyr1	-0.780646	0.722133	1.83165e-63	6.50046e-62	133.374
Ccl6	-0.891809	0.787937	1.85697e-63	6.5735e-62	133.36
Rarres2	0.914626	1.1439	2.8396e-63	1.00262e-61	132.937
Tex2	-0.744005	0.744475	4.92213e-63	1.72912e-61	132.388
Junb	0.965481	2.27887	5.14284e-63	1.80208e-61	132.345
Txn2	-0.834201	2.03056	5.39893e-63	1.88703e-61	132.296
Aco1	-0.899588	1.13957	6.51202e-63	2.27035e-61	132.109
Ndufs2	-0.76511	2.52857	1.13355e-62	3.94208e-61	131.557
Fech	-0.882147	1.08422	1.16005e-62	4.02413e-61	131.534
Slc7a4	-0.682937	0.496776	1.23363e-62	4.26867e-61	131.473
Pomgnt1	-0.909429	1.41411	1.58412e-62	5.46777e-61	131.223
Zyx	0.876486	2.0352	1.87796e-62	6.46587e-61	131.054
Tmco4	-0.734526	0.650088	1.98465e-62	6.81625e-61	130.999
Bckdha	-0.874609	2.55313	2.57942e-62	8.83707e-61	130.737
Wwc3	-0.833718	0.910881	2.89409e-62	9.89063e-61	130.623
Fam53b	-0.798667	0.774886	3.87335e-62	1.32047e-60	130.332
Rhbdl2	-0.669185	0.46823	3.94785e-62	1.34256e-60	130.313
Epas1	-0.813734	1.96669	5.10835e-62	1.73296e-60	130.056
Atp5mg	-0.631761	4.19405	1.01064e-61	3.42012e-60	129.376
Sdha	-0.826574	2.22812	1.11493e-61	3.76383e-60	129.278
Mtus1	-0.873362	0.973601	2.08119e-61	7.00869e-60	128.656
Mrps23	-0.887399	1.9764	2.48331e-61	8.34258e-60	128.48
Wfs1	-0.816953	0.878725	2.57672e-61	8.63543e-60	128.443
Pnpla8	-0.935784	1.39304	2.94967e-61	9.86144e-60	128.308
Rps17	0.70361	3.56698	8.25238e-61	2.75232e-59	127.283
Pfdn1	-0.919024	2.47213	9.70328e-61	3.22844e-59	127.122
Cox5a	-0.732019	3.09429	1.85378e-60	6.15303e-59	126.476
Lzts1	-0.66035	0.515477	1.92071e-60	6.35994e-59	126.441
Spg7	-0.822028	1.02026	2.04899e-60	6.76851e-59	126.377
Lonp1	-0.85237	2.22097	2.62928e-60	8.66473e-59	126.128
Hmox1	-0.879229	1.4599	3.85779e-60	1.26831e-58	125.746
Slc16a13	-0.75445	0.686095	3.91318e-60	1.28347e-58	125.732
Igfbp7	-0.715969	4.25735	5.12855e-60	1.67811e-58	125.462
Sdhc	-0.811085	1.9105	5.58386e-60	1.82279e-58	125.377
Slc22a17	-0.919243	2.05604	8.66944e-60	2.82338e-58	124.939
Tef	-1.20273	1.72168	9.53796e-60	3.09894e-58	124.844
Slc20a2	-0.814674	0.72206	9.63971e-60	3.12272e-58	124.833
St3gal5	-1.05684	1.64576	9.65627e-60	3.12272e-58	124.831
Gnpat	-0.82882	1.01753	1.00368e-59	3.23821e-58	124.793
Cox17	-0.775019	2.52486	1.34984e-59	4.34491e-58	124.498
Creb3l1	1.00259	1.40025	1.38433e-59	4.44558e-58	124.472
Rpl13	0.727623	4.75571	2.5008e-59	8.01239e-58	123.883
Atp5po	-0.662598	3.57996	2.73267e-59	8.73509e-58	123.795
Laptm4a	-0.628343	3.59804	4.18999e-59	1.33626e-57	123.369
Pla2g1b	-1.30982	2.59336	4.3912e-59	1.39721e-57	123.322
Cdkn1b	-0.751029	0.625563	6.6232e-59	2.10256e-57	122.912
Acad10	-0.819816	1.044	8.72092e-59	2.76216e-57	122.638
Rmdn1	-0.656552	0.547464	1.37801e-58	4.35458e-57	122.182
Taf13	-0.799339	0.88926	1.7182e-58	5.41723e-57	121.962
Parp3	-0.802715	0.782157	1.77835e-58	5.59414e-57	121.928
RGD1564664	0.962281	1.58785	2.07078e-58	6.49925e-57	121.776
Psmb7	-0.771581	2.5992	2.1239e-58	6.65087e-57	121.751
Bcl2l11	-0.737319	0.704574	3.00618e-58	9.39244e-57	121.405
Cox6a1	-0.603486	4.25152	3.75467e-58	1.17046e-56	121.183
Emcn	-0.791887	0.932562	3.94656e-58	1.22751e-56	121.134
Etfdh	-0.849277	1.14296	4.25006e-58	1.31895e-56	121.06
Hmbs	-0.876586	1.10126	6.52928e-58	2.02174e-56	120.632
Clec2d2	-0.663966	0.521094	1.10073e-57	3.40073e-56	120.111
Pdha1	-0.859605	1.50366	1.29063e-57	3.97853e-56	119.953
Rogdi	-0.918629	1.50819	1.31966e-57	4.05898e-56	119.931
Prdx1	-0.608207	3.66307	2.07781e-57	6.37671e-56	119.478
Csrp2	0.896672	1.7271	2.68381e-57	8.21827e-56	119.223
Acadvl	-0.866183	1.77958	2.95627e-57	9.03261e-56	119.127
Fkbp8	-0.748977	2.76464	4.94361e-57	1.50715e-55	118.615
Tpst2	-0.763967	0.853533	6.71289e-57	2.04205e-55	118.31
Mob4	-0.737896	2.61569	1.21185e-56	3.67833e-55	117.721
Slc6a8	-0.847994	1.30792	1.33347e-56	4.03862e-55	117.626
Herpud1	-0.758627	3.16175	2.31454e-56	6.99467e-55	117.076
Nucb1	-0.754882	2.37129	3.49164e-56	1.05289e-54	116.667
Tom1l1	-0.722338	0.637701	3.85418e-56	1.15969e-54	116.568
Cd1d1	-0.630503	0.521995	4.3866e-56	1.31703e-54	116.439
Cemip	-0.777918	0.730122	5.67588e-56	1.70043e-54	116.183
Acot7	-0.850517	1.17306	5.96125e-56	1.78206e-54	116.134
Smpdl3a	-0.880778	1.24927	7.33783e-56	2.18886e-54	115.927
Mroh1	-0.829081	1.03638	8.46354e-56	2.51922e-54	115.784
Sri	-0.743827	0.83836	8.9191e-56	2.64913e-54	115.732
Htatip2	-0.858665	1.21388	9.13665e-56	2.70793e-54	115.708
Tax1bp3	-0.792705	1.94851	1.99046e-55	5.88674e-54	114.932
AC108574.1	-0.733634	0.79453	4.42845e-55	1.30691e-53	114.136
Trappc6a	-0.878562	1.85597	9.78967e-55	2.88295e-53	113.345
Esrra	-0.819824	1.11436	1.38332e-54	4.06508e-53	113.001
Emp3	0.87528	2.14359	1.58782e-54	4.65616e-53	112.863
Dhrs4	-0.76535	0.913014	1.59715e-54	4.67359e-53	112.857
Odc1	0.857877	3.21094	1.75503e-54	5.12475e-53	112.764
Nudt7	-0.703313	0.662033	1.82324e-54	5.31273e-53	112.726
Mindy1	-0.839044	1.08001	2.23758e-54	6.50636e-53	112.522
Rpl12	0.792581	3.10938	2.96012e-54	8.5893e-53	112.243
Sqle	-0.839774	1.05821	3.65364e-54	1.05795e-52	112.033
Aplnr	-0.717244	0.732579	4.42897e-54	1.27978e-52	111.841
Pcbp3	-0.670273	0.619815	4.49838e-54	1.29713e-52	111.826
Cptp	-0.681355	0.630004	4.90996e-54	1.41286e-52	111.739
Cpt1a	-0.862756	1.58796	5.00538e-54	1.43733e-52	111.719
Pmpca	-0.855012	1.37323	5.59314e-54	1.60279e-52	111.609
Cltc	-0.711032	2.74537	8.25522e-54	2.36075e-52	111.221
Rps18l1	0.641896	4.27694	8.51083e-54	2.42664e-52	111.191
Bpifb6	-0.816162	0.780403	8.52067e-54	2.42664e-52	111.189
Abca7	-0.691606	0.604761	1.13655e-53	3.23019e-52	110.902
Qdpr	-0.801038	1.3206	1.31855e-53	3.73977e-52	110.754
Psmc1	-0.740899	2.44224	1.64496e-53	4.65601e-52	110.534
Mpzl2	0.671436	0.458374	2.4701e-53	6.97729e-52	110.129
Me1	-0.752871	3.03327	2.80838e-53	7.91666e-52	110.001
Heatr5b	-0.743229	0.819057	3.32764e-53	9.36135e-52	109.832
Plp2	-0.800611	1.16413	4.76205e-53	1.33695e-51	109.475
Slc25a33	-0.641957	0.576601	6.63773e-53	1.85977e-51	109.144
Pink1	-0.84217	1.31206	9.19274e-53	2.57044e-51	108.82
Sdc3	-0.828957	1.13528	9.66807e-53	2.6979e-51	108.77
Haus7	0.798638	0.950652	1.64617e-52	4.58443e-51	108.239
Rasd1	0.859838	0.94655	1.73895e-52	4.8331e-51	108.185
Rps24	0.635957	4.36016	2.0409e-52	5.66094e-51	108.025
Calcrl	-0.596929	0.487595	4.06193e-52	1.12442e-50	107.34
Gk	-0.651068	0.599457	5.3892e-52	1.48886e-50	107.058
Dtx3l	-0.724397	2.60643	6.31033e-52	1.73987e-50	106.901
Tuba1c	-0.724616	2.3079	1.12669e-51	3.10029e-50	106.323
Cpe	-0.985091	0.98941	1.1658e-51	3.20155e-50	106.289
Arl6ip5	-0.798343	1.06674	1.24011e-51	3.39889e-50	106.228
Tspo	-0.704362	2.41011	1.45839e-51	3.98924e-50	106.066
Mrpl18	-0.770875	1.02611	1.77047e-51	4.83336e-50	105.873
Pdlim1	-0.813938	1.117	1.88691e-51	5.14109e-50	105.81
Clec2g	-0.846887	1.62605	2.44766e-51	6.6558e-50	105.551
Reg3g	0.983941	0.889119	2.69995e-51	7.32747e-50	105.453
Dysf	-0.64066	0.572427	2.79402e-51	7.56792e-50	105.419
Tsr3	-0.755842	1.01916	3.6655e-51	9.90901e-50	105.148
Ccnk	-0.752798	0.934546	3.71006e-51	1.00099e-49	105.136
Prkcsh	-0.723511	2.6494	3.97046e-51	1.06917e-49	105.069
Hibch	-0.627671	0.599403	4.44313e-51	1.19412e-49	104.957
Ndufv3	-0.800898	1.64731	5.79107e-51	1.55338e-49	104.693
Coq5	-0.718761	0.765536	6.12071e-51	1.63862e-49	104.638
Jpt1	-0.724058	2.68018	6.56933e-51	1.75533e-49	104.567
Asph	-0.726212	0.824013	6.70383e-51	1.78782e-49	104.547
Etnk1	0.851601	1.51393	1.09016e-50	2.9017e-49	104.063
Bst2	0.84923	2.30331	2.36146e-50	6.26148e-49	103.293
Nr1d1	-0.764762	1.03664	2.41207e-50	6.38344e-49	103.272
Ebpl	-0.662882	0.660741	2.85534e-50	7.54214e-49	103.104
Bscl2	-0.769377	1.17222	2.98082e-50	7.85857e-49	103.061
Ndufs1	-0.657627	0.688918	5.64872e-50	1.48076e-48	102.424
AABR07044711.1	-0.735666	3.21849	6.93019e-50	1.81325e-48	102.221
Ctbp2	-0.678764	0.671344	7.28092e-50	1.90142e-48	102.171
Actg2	0.866369	1.0861	7.95463e-50	2.07345e-48	102.083
Hao2	0.959821	1.39904	8.81614e-50	2.29369e-48	101.981
LOC498276	-0.627363	0.569267	1.64181e-49	4.26348e-48	101.362
Rex1bd	-0.758709	1.75679	1.8927e-49	4.90578e-48	101.22
Itga6	-0.76418	1.11538	1.92522e-49	4.98073e-48	101.203
Penk	0.82832	1.18277	2.60985e-49	6.73934e-48	100.9
Nceh1	-0.772831	0.845542	3.28144e-49	8.4578e-48	100.672
Pcyt2	-0.816236	1.60173	4.15835e-49	1.06981e-47	100.436
Mdh2	-0.66816	2.76831	4.73411e-49	1.21342e-47	100.307
Tars	-0.754789	1.3727	5.18302e-49	1.32603e-47	100.217
Sts	-0.743836	0.964284	5.69195e-49	1.45355e-47	100.123
Hibadh	-0.784151	1.51375	9.66829e-49	2.45991e-47	99.5959
Bet1	-0.714863	0.969246	9.78179e-49	2.48422e-47	99.5842
Rpl37	0.686295	3.40192	1.02057e-48	2.58713e-47	99.542
Crem	0.812225	2.25927	1.203e-48	3.04401e-47	99.3782
Eps15l1	-0.689633	0.770131	1.54005e-48	3.88265e-47	99.1322
Chp1	-0.809014	1.41106	2.06937e-48	5.20767e-47	98.838
Tbc1d9	-0.616787	0.560609	2.4304e-48	6.10512e-47	98.6779
Cables1	-0.632357	0.57539	2.81779e-48	7.05262e-47	98.5306
Uqcrc2	-0.748753	1.89601	2.83086e-48	7.07254e-47	98.526
Rgs3	-0.740019	2.23372	3.08878e-48	7.70303e-47	98.4392
Emc7	-0.743607	1.6991	3.41005e-48	8.48894e-47	98.3406
Sgk1	-0.927568	2.78672	4.01865e-48	9.98602e-47	98.1771
Acox1	-0.793409	1.28887	4.06508e-48	1.00833e-46	98.1657
Slc39a6	-0.728777	1.07896	4.15104e-48	1.02781e-46	98.1448
Sh3bp2	-0.645027	0.623633	4.5165e-48	1.1163e-46	98.0608
Tie1	-0.714447	0.926425	5.57213e-48	1.37231e-46	97.8517
Auh	-0.702208	0.915897	5.80292e-48	1.42661e-46	97.8112
Afmid	-0.610442	0.472322	5.88383e-48	1.44394e-46	97.7975
Lum	0.771115	2.53645	6.4736e-48	1.58586e-46	97.7023
LOC102556347	0.757555	3.39212	6.93966e-48	1.69703e-46	97.6331
Ptprv	0.656019	0.522946	1.13948e-47	2.77668e-46	97.1393
Cmpk1	-0.754617	1.13527	1.58246e-47	3.84936e-46	96.8123
Babam2	-0.801404	1.349	3.08891e-47	7.50063e-46	96.1463
Arhgef2	-0.754896	0.979356	3.43212e-47	8.31943e-46	96.0414
Grpel1	-0.720011	2.25784	4.0179e-47	9.72232e-46	95.8845
Mcoln1	-0.692627	0.794836	4.4936e-47	1.08544e-45	95.7731
Sh3glb1	-0.744165	1.23903	4.72099e-47	1.13838e-45	95.7239
Folr1	-0.711098	3.24518	5.16456e-47	1.24318e-45	95.6345
Map1lc3a	0.676028	2.47553	5.615e-47	1.34926e-45	95.5513
Prlr	-0.759029	0.850768	6.88516e-47	1.6516e-45	95.3482
Sumf1	-0.700532	0.915114	7.00679e-47	1.67787e-45	95.3308
Dusp22	-0.691208	0.80899	8.31088e-47	1.98672e-45	95.1608
Fars2	-0.633369	0.691531	1.29909e-46	3.0948e-45	94.7161
Trim32	-0.628196	0.690624	1.90116e-46	4.52131e-45	94.3369
Pmm2	-0.705144	0.908178	1.97169e-46	4.68099e-45	94.3007
Oxct1	-0.775912	1.15802	2.05045e-46	4.85963e-45	94.2617
Nubp2	-0.709463	0.971339	2.22776e-46	5.27085e-45	94.1791
Mrpl37	-0.771712	1.57442	2.81435e-46	6.64735e-45	93.9464
Hsd17b8	-0.777322	1.46056	3.12215e-46	7.34926e-45	93.843
Gstm3	0.803439	1.086	3.36461e-46	7.90655e-45	93.7686
Rab7a	-0.669619	2.46684	3.55154e-46	8.33168e-45	93.7147
Slc39a13	-0.673832	0.731093	3.79809e-46	8.89499e-45	93.6479
LOC294154	-0.792264	1.75605	5.09892e-46	1.19213e-44	93.3547
Acot2	-0.672006	0.696432	5.91756e-46	1.3812e-44	93.2065
LOC100366030	-0.597626	0.555626	7.02144e-46	1.63609e-44	93.0362
Alg9	-0.676503	0.74966	7.07001e-46	1.64464e-44	93.0293
Polr2k	-0.721618	1.82831	7.67623e-46	1.78266e-44	92.9474
Ucp2	-0.683029	2.55038	7.71995e-46	1.78981e-44	92.9417
AC134224.3	-1.00534	3.65994	7.79609e-46	1.80444e-44	92.932
Cyp46a1	-0.603723	0.52825	8.91247e-46	2.05596e-44	92.7987
Ece1	0.71907	1.78035	9.31899e-46	2.14616e-44	92.7543
Atp6v1a	-0.711029	0.91496	1.15004e-45	2.64414e-44	92.5449
Akip1	-0.708933	0.92361	1.45773e-45	3.34601e-44	92.3089
NEWGENE-6497122	-0.708637	0.930925	1.51541e-45	3.47264e-44	92.2703
Tril	-0.748105	1.03459	1.7489e-45	4.00108e-44	92.1276
Marveld1	-0.754638	1.31948	2.512e-45	5.72794e-44	91.7671
Fmo1	-0.603484	0.457759	2.74916e-45	6.25841e-44	91.6773
Tmem135	-0.633275	0.728194	3.19812e-45	7.26851e-44	91.5267
Ext1	-0.762722	1.16053	3.6515e-45	8.2853e-44	91.3948
Ldhb	0.74109	2.58209	3.82291e-45	8.66004e-44	91.3491
Rab2a	-0.647586	0.699605	3.85675e-45	8.72243e-44	91.3403
Pld3	-0.742152	2.16012	5.82207e-45	1.31243e-43	90.9303
Msmo1	-0.766213	2.73374	5.9721e-45	1.34406e-43	90.905
Mmp12	-0.592008	0.433611	1.21586e-44	2.7187e-43	90.1973
Lgmn	-0.712107	1.91464	1.82031e-44	4.06369e-43	89.7956
Nr4a1	0.810721	2.23811	1.83451e-44	4.08881e-43	89.7878
Smim19	-0.689547	0.943053	1.84044e-44	4.09542e-43	89.7846
Pon2	-0.706413	1.11084	1.91782e-44	4.26077e-43	89.7436
Sft2d2	-0.757045	1.26343	2.56484e-44	5.6891e-43	89.4543
Itga8	-0.65527	0.648906	2.59077e-44	5.73742e-43	89.4442
Cyp27a1	-0.732607	0.994336	3.17647e-44	7.02324e-43	89.2414
Gpi	-0.661977	2.60633	3.31647e-44	7.32109e-43	89.1984
LOC691807	-0.748742	1.74035	3.36383e-44	7.41383e-43	89.1843
LOC499235	-0.595874	2.42741	4.81343e-44	1.05918e-42	88.8276
Gem	0.724941	0.911591	4.97726e-44	1.0935e-42	88.7943
Mmadhc	-0.604707	0.682848	6.85769e-44	1.50424e-42	88.4753
Cox14	-0.698833	0.890482	6.88479e-44	1.50779e-42	88.4714
Dock9	-0.682173	0.72493	9.544e-44	2.08687e-42	88.1463
Aplp2	-0.614339	2.37356	1.18487e-43	2.58672e-42	87.931
Txnrd1	-0.740838	1.39716	1.20282e-43	2.62176e-42	87.916
Derl2	-0.603888	0.672666	1.43956e-43	3.13286e-42	87.7372
Snapin	-0.720012	1.6311	1.68125e-43	3.6531e-42	87.5827
Acat1	-0.797168	1.49568	1.73275e-43	3.75909e-42	87.5527
Parp9	-0.724069	1.80628	1.81131e-43	3.92337e-42	87.5086
Blvrb	-0.722224	1.12845	1.83056e-43	3.95888e-42	87.4981
Gja1	0.658521	2.4179	2.05735e-43	4.4424e-42	87.3818
Dpcd	-0.742794	1.04673	2.1706e-43	4.67964e-42	87.3285
Ecsit	-0.667492	0.884228	2.99982e-43	6.44625e-42	87.0064
Atp6v1h	-0.7141	1.13117	3.004e-43	6.44625e-42	87.0051
Nat8l	0.806669	1.15741	3.25209e-43	6.96784e-42	86.9261
Procr	0.786659	1.13963	4.93214e-43	1.05511e-41	86.5116
Tmem268	-0.612002	0.644989	5.83278e-43	1.24586e-41	86.3446
Reep6	0.660381	0.653549	6.23021e-43	1.3287e-41	86.279
Amdhd1	-0.800988	0.616962	1.25616e-42	2.65038e-41	85.5811
Tst	-0.669452	2.70636	1.63535e-42	3.43996e-41	85.3186
Echdc1	-0.707312	0.975663	1.64143e-42	3.4475e-41	85.3149
Pigk	-0.68411	1.45512	1.90442e-42	3.99379e-41	85.167
Usp46	-0.603773	0.643899	2.28656e-42	4.78794e-41	84.985
Slco2a1	-0.663847	0.805082	2.86295e-42	5.98581e-41	84.7613
Coq9	-0.740191	1.15812	2.93315e-42	6.12334e-41	84.7372
Ntmt1	-0.67696	1.65814	3.27315e-42	6.82284e-41	84.6281
Mlycd	-0.724597	1.23393	4.23169e-42	8.80764e-41	84.3725
Hdlbp	-0.592568	3.12699	5.01692e-42	1.04107e-40	84.2031
Map1a	-0.610285	0.591455	5.7856e-42	1.19878e-40	84.0612
Afg3l1	-0.740929	1.3857	6.55056e-42	1.35525e-40	83.9376
Rasal1	-0.710866	0.923244	7.61125e-42	1.57235e-40	83.7883
Med14	-0.724807	1.21096	8.93727e-42	1.84078e-40	83.6285
Ccpg1	-0.642797	0.760251	1.10467e-41	2.27187e-40	83.4176
Impdh1	-0.745617	1.60935	1.19499e-41	2.45399e-40	83.3394
Slc50a1	-0.700789	1.10285	1.69742e-41	3.47031e-40	82.9901
Tmem14c	-0.70295	1.12996	1.8707e-41	3.81893e-40	82.8934
Sdf2l1	-0.64053	0.858898	1.91676e-41	3.90719e-40	82.8692
Aars	-0.695547	2.04852	1.95669e-41	3.98273e-40	82.8487
Cd164	-0.609868	2.27216	2.5201e-41	5.11447e-40	82.5969
Dhh	0.598882	0.535989	2.52954e-41	5.12611e-40	82.5932
Tmbim6	-0.647571	2.23935	2.57854e-41	5.21777e-40	82.5741
LOC108348287	0.62865	3.4795	3.04276e-41	6.14816e-40	82.4094
Tufm	-0.672372	2.08305	3.41882e-41	6.88791e-40	82.2934
Entpd4	-0.666736	0.853929	3.83066e-41	7.70642e-40	82.1802
Itpr1	-0.702262	1.09719	3.9231e-41	7.88094e-40	82.1565
Tm2d2	-0.683312	1.04293	4.27003e-41	8.56542e-40	82.0722
Ywhab	-0.659448	2.35689	5.18435e-41	1.03695e-39	81.8791
Uhrf1bp1l	-0.69413	1.56278	5.69515e-41	1.13583e-39	81.7856
Cst3	0.586819	4.0065	5.91446e-41	1.17787e-39	81.748
Tysnd1	-0.620342	0.779666	8.45396e-41	1.6812e-39	81.3926
Ap1s1	-0.716829	1.81926	9.41467e-41	1.86688e-39	81.2855
Zbed5	-0.622155	2.60665	1.15352e-40	2.28411e-39	81.0834
2021-03-02	-0.658481	2.35703	1.28681e-40	2.54439e-39	80.9746
Pam16	-0.67281	2.13409	1.62616e-40	3.21079e-39	80.7417
Smim12	-0.599208	0.728541	1.84758e-40	3.64278e-39	80.6147
Syf2	-0.688616	1.61493	1.91784e-40	3.77593e-39	80.5776
Coasy	-0.691329	1.02911	2.09251e-40	4.11398e-39	80.4908
Smim14	-0.700426	1.48068	2.1648e-40	4.25008e-39	80.4571
Amdhd2	-0.620241	0.747879	2.22168e-40	4.34941e-39	80.4313
Mapk6	-0.609589	0.80747	2.27556e-40	4.4486e-39	80.4074
Lrp10	-0.666916	1.81785	2.38243e-40	4.65094e-39	80.3618
Cyb5a	-0.658786	2.13983	2.93402e-40	5.71163e-39	80.1546
Fkbp5	-0.775833	1.90316	3.29397e-40	6.40335e-39	80.0394
Gtf2i	-0.629088	2.3771	3.89165e-40	7.55459e-39	79.8735
RGD1306063	-0.656084	0.94845	4.14251e-40	8.03033e-39	79.8114
Abhd5	-0.602551	0.820187	5.45877e-40	1.05671e-38	79.5369
Psmd5	-0.649736	0.922273	5.83304e-40	1.12601e-38	79.4709
Slc35e4	-0.613497	0.785831	6.21714e-40	1.19849e-38	79.4075
RT1-T24-3	-0.62139	0.598267	6.29379e-40	1.21158e-38	79.3953
Hsd17b11	-0.68722	1.14085	6.50812e-40	1.2511e-38	79.3619
Colec12	-0.767642	0.931348	6.9081e-40	1.32431e-38	79.3026
Psmd2	-0.678434	2.31694	6.94988e-40	1.33047e-38	79.2966
Rbp4	0.709938	0.764221	7.44996e-40	1.42424e-38	79.2275
Col4a1	-0.695195	2.57665	7.84074e-40	1.49688e-38	79.1766
Got1	0.732165	2.95198	8.54125e-40	1.62837e-38	79.0915
Cald1	-0.688241	2.28736	9.37598e-40	1.78505e-38	78.9987
Wt1	0.6951	0.781129	1.25851e-39	2.38616e-38	78.7059
Tmco1	-0.633591	0.86942	1.31768e-39	2.49494e-38	78.6602
LOC100360087	-0.688698	1.67366	1.32097e-39	2.49775e-38	78.6577
Jak2	0.715883	1.09505	1.38813e-39	2.61759e-38	78.6084
Cdc42	-0.663014	1.4891	1.54109e-39	2.90208e-38	78.5044
Txn1	-0.65652	1.99615	1.65469e-39	3.10754e-38	78.4336
Creld1	-0.689453	1.30294	2.69034e-39	5.03202e-38	77.9501
Rpl32	0.588869	3.46267	3.61241e-39	6.7294e-38	77.6569
Lancl1	-0.63446	0.820083	3.81897e-39	7.10461e-38	77.6016
Anxa4	-0.691441	1.15001	4.55605e-39	8.46447e-38	77.4261
Abhd13	-0.641574	0.893168	4.65164e-39	8.63048e-38	77.4054
Map7d1	-0.744016	1.53291	5.88212e-39	1.08843e-37	77.172
Glrx2	-0.61545	0.831761	5.90303e-39	1.09084e-37	77.1684
Tns3	-0.685788	2.01139	7.36238e-39	1.3587e-37	76.9487
Atp11a	-0.630232	0.846053	7.87196e-39	1.45081e-37	76.8821
Capzb	-0.699373	2.04139	1.12374e-38	2.06282e-37	76.528
Saraf	-0.657098	1.72161	1.24831e-38	2.28543e-37	76.4235
AC134224.1	-0.702189	1.16032	1.32054e-38	2.41448e-37	76.3675
Glo1	-0.701397	1.37818	1.35957e-38	2.48256e-37	76.3386
Hsph1	0.666884	1.70607	1.37118e-38	2.49717e-37	76.3301
Glmp	-0.665387	2.72216	1.76993e-38	3.2149e-37	76.0762
Orm1	-0.899558	0.842638	2.1271e-38	3.85861e-37	75.8934
Ndufb7	-0.622192	2.56644	2.2266e-38	4.03381e-37	75.8479
Rtn4	-0.631113	2.24211	2.34668e-38	4.24581e-37	75.7956
Ctsk	0.696741	1.10398	2.53738e-38	4.57291e-37	75.7179
Sirt5	-0.645147	0.962676	2.56243e-38	4.61204e-37	75.7082
Sod3	-0.794433	1.93455	2.91228e-38	5.22136e-37	75.5809
Ide	-0.704906	1.28363	2.9276e-38	5.24203e-37	75.5756
Tex264	-0.700454	1.41972	2.94338e-38	5.26347e-37	75.5703
Anxa7	-0.722826	1.32303	2.96715e-38	5.29914e-37	75.5623
Nudt9	-0.622538	1.02313	3.56182e-38	6.34482e-37	75.3806
RGD1560394	0.717667	1.33387	4.08105e-38	7.26039e-37	75.2453
Dhrs3	-0.698012	1.68687	4.22876e-38	7.51352e-37	75.2099
Wdr61	-0.67077	0.976932	4.8606e-38	8.62508e-37	75.0714
Pdhb	-0.69577	1.47357	4.89139e-38	8.6686e-37	75.0651
Idh3B	-0.67843	1.56902	6.20657e-38	1.09713e-36	74.8283
Sirt2	-0.741596	1.45028	6.24023e-38	1.10167e-36	74.8229
Naxe	-0.688069	1.45017	7.72129e-38	1.35795e-36	74.6111
LOC689574	-0.678294	1.46468	8.18622e-38	1.43789e-36	74.5529
Prnp	0.666056	2.14096	9.13819e-38	1.60306e-36	74.4435
Utrn	-0.615608	0.882794	9.50396e-38	1.66512e-36	74.4045
Blvra	-0.588455	0.745561	9.54584e-38	1.67034e-36	74.4001
Smoc2	0.697105	0.93356	1.02852e-37	1.79518e-36	74.3259
Prkab1	-0.641979	1.00103	1.05366e-37	1.83674e-36	74.3019
Jun	-0.63187	2.13901	1.08265e-37	1.88481e-36	74.2749
Tgm2	0.697625	2.82912	1.26321e-37	2.19099e-36	74.1215
Commd4	-0.717638	1.71937	1.31043e-37	2.27005e-36	74.085
Mgarp	-0.633765	0.604776	1.38178e-37	2.39066e-36	74.0323
Flad1	-0.606276	0.703425	1.39936e-37	2.41805e-36	74.0197
Klhl22	-0.644704	1.05152	1.40481e-37	2.42444e-36	74.0159
Atp6v1b2	-0.684564	1.45323	1.44521e-37	2.49105e-36	73.9877
Gars	-0.659749	1.21476	1.70792e-37	2.94022e-36	73.8215
Aif1	-0.697934	0.91163	1.79062e-37	3.07876e-36	73.7745
Tm4sf1	-0.701568	1.52228	2.38547e-37	4.09136e-36	73.4893
Agrn	-0.667709	1.12159	2.45318e-37	4.20228e-36	73.4614
Ptges	-0.704503	1.16055	3.05057e-37	5.21271e-36	73.2447
Skiv2l	-0.592378	0.740354	3.29747e-37	5.62765e-36	73.1673
Scoc	-0.614189	0.83661	3.34225e-37	5.69706e-36	73.1539
RT1-A2	-0.949361	2.25659	3.93426e-37	6.69792e-36	72.9917
Il18	0.718507	1.1667	4.48714e-37	7.62043e-36	72.8609
Cluh	-0.670827	1.72619	4.79429e-37	8.13209e-36	72.7951
Pcmtd1	-0.670559	1.11595	5.45526e-37	9.24189e-36	72.6667
Kif22	-0.600778	0.793112	6.10894e-37	1.0324e-35	72.5541
Wnt5b	-0.585553	0.657314	7.1472e-37	1.2064e-35	72.398
Lpin3	-0.672873	1.20079	1.00013e-36	1.67995e-35	72.0639
Cfap36	-0.627906	0.851925	1.13832e-36	1.90744e-35	71.9352
Amz2	-0.610438	0.82264	1.90536e-36	3.18504e-35	71.423
Pja1	0.655728	1.16573	2.37096e-36	3.94903e-35	71.2056
Psmd8	-0.603303	2.09874	3.4232e-36	5.67431e-35	70.8405
Erlec1	-0.62678	1.28124	3.43235e-36	5.68267e-35	70.8378
Rmdn2	-0.633846	1.10825	5.45747e-36	9.02471e-35	70.3767
Pnpla7	-0.59887	0.803485	6.43061e-36	1.06212e-34	70.2136
Eci2	-0.645446	1.74332	6.66312e-36	1.0966e-34	70.1783
Jam2	-0.68327	2.14591	7.07873e-36	1.16362e-34	70.1181
Tut1	-0.600382	0.710399	7.35953e-36	1.20834e-34	70.0794
Cdr2l	-0.649795	1.21472	8.04478e-36	1.31929e-34	69.9909
Tmem223	-0.69381	1.85942	8.8688e-36	1.4527e-34	69.894
Grn	-0.63878	2.43426	9.13748e-36	1.49318e-34	69.8643
Anxa6	-0.629845	2.37172	9.26594e-36	1.51238e-34	69.8504
Nf2	-0.681214	1.21348	1.08558e-35	1.7698e-34	69.693
Rhobtb1	-0.598755	0.788639	1.10751e-35	1.80129e-34	69.6731
Ets2	-0.66004	0.975257	1.21179e-35	1.96859e-34	69.5836
Csf2ra	-0.6377	0.928675	1.33963e-35	2.17117e-34	69.4839
Smap2	-0.62189	0.878894	1.59119e-35	2.57586e-34	69.3128
Mtg2	-0.611732	0.988873	2.01376e-35	3.25613e-34	69.0787
Rnf10	-0.670853	1.9194	2.04569e-35	3.3039e-34	69.063
Rab5b	-0.633434	1.11705	2.80285e-35	4.50572e-34	68.75
Zfp706	-0.614693	2.33444	4.33287e-35	6.9331e-34	68.317
Slc35b2	-0.631728	1.13808	4.49608e-35	7.18595e-34	68.2802
Scx	-0.946059	1.47241	4.67178e-35	7.45815e-34	68.2421
Parm1	0.67252	1.16431	6.36487e-35	1.01144e-33	67.9347
Usp33	-0.599038	0.930018	6.47696e-35	1.02807e-33	67.9173
Isyna1	0.68726	2.47417	8.75478e-35	1.38803e-33	67.6178
Mylk	0.684629	1.39519	1.11453e-34	1.76501e-33	67.3778
RGD735065	-0.644424	1.10128	1.27247e-34	2.01053e-33	67.2461
Cd9	0.657199	0.96105	1.29201e-34	2.03908e-33	67.2309
Pitrm1	-0.613675	1.0191	1.5212e-34	2.39805e-33	67.0686
Pbxip1	-0.6349	1.86223	1.54272e-34	2.42921e-33	67.0546
Fam102a	-0.621291	0.972855	1.56768e-34	2.46571e-33	67.0387
Prcp	-0.652914	0.853917	1.77064e-34	2.77863e-33	66.9177
Atp6v0b	-0.590448	2.3041	1.92821e-34	3.02247e-33	66.8329
Raly	0.653216	1.69805	2.03998e-34	3.19405e-33	66.7769
Uxs1	-0.705514	1.82457	2.49861e-34	3.8989e-33	66.5753
Rgl1	-0.676746	1.23807	2.53246e-34	3.94727e-33	66.562
Cd68	-0.64962	0.814799	2.90494e-34	4.51261e-33	66.4256
Hnrnph1	0.602454	2.18746	3.66662e-34	5.68943e-33	66.1941
Apopt1	-0.621223	1.05119	4.36607e-34	6.75204e-33	66.0206
Srp68	-0.66659	1.4789	5.30553e-34	8.16839e-33	65.8269
Shisa5	-0.644931	1.63263	5.88589e-34	9.05185e-33	65.7237
Hsd17b4	-0.618098	1.21548	6.77503e-34	1.03846e-32	65.5839
Ndufs3	-0.66218	1.81863	7.34277e-34	1.12424e-32	65.5039
Cfh	-0.607922	0.886053	7.3534e-34	1.12462e-32	65.5025
Des	0.683551	0.890324	7.47189e-34	1.14148e-32	65.4866
Tpm1	0.670671	1.64868	8.98697e-34	1.36691e-32	65.3031
Kif1b	-0.62784	0.941729	9.85736e-34	1.496e-32	65.2112
Etnk2	0.657649	1.24751	1.14207e-33	1.72947e-32	65.0649
Slc33a1	-0.59928	0.961262	1.1669e-33	1.76514e-32	65.0436
Ndufa9	-0.636442	1.69403	1.26188e-33	1.90673e-32	64.9658
Sdc2	-0.630591	1.23241	1.36578e-33	2.05923e-32	64.8872
Bin1	-0.605248	1.0037	1.69425e-33	2.5517e-32	64.673
Actn4	-0.591764	1.89171	1.96334e-33	2.94097e-32	64.5265
C1qb	-0.765997	1.73638	2.82081e-33	4.2072e-32	64.1664
Gcdh	-0.607594	0.998128	3.91957e-33	5.82715e-32	63.8395
Rab31	-0.591276	1.01687	4.63101e-33	6.85538e-32	63.6737
Tbcd	-0.616393	0.981204	5.23828e-33	7.73778e-32	63.5513
Sar1b	-0.626503	1.32204	8.28467e-33	1.2147e-31	63.0958
Adss	-0.601198	0.917561	8.43634e-33	1.23563e-31	63.0778
Psmd3	-0.635129	1.83941	8.89172e-33	1.30096e-31	63.0255
Slc4a2	-0.622587	1.85549	1.15481e-32	1.68249e-31	62.7658
Pccb	-0.630313	1.43178	1.40075e-32	2.03226e-31	62.574
LOC100912578	-0.598857	1.94906	1.55965e-32	2.26043e-31	62.4672
Rad23b	-0.608398	1.77191	2.12093e-32	3.05471e-31	62.1618
Mrps36	-0.658456	1.39224	2.45947e-32	3.53127e-31	62.0146
Cog4	-0.590432	0.988894	2.6857e-32	3.8362e-31	61.9272
Suclg2	-0.632734	2.056	3.52636e-32	5.01113e-31	61.6566
Chmp5	-0.613713	1.46281	3.68233e-32	5.2274e-31	61.6136
Mien1	-0.630078	1.51988	3.91082e-32	5.5404e-31	61.5538
Phyh	-0.6235	2.05742	5.71096e-32	8.03307e-31	61.1777
Fam32a	-0.624061	1.57888	5.97467e-32	8.38696e-31	61.1328
Ntan1	-0.607283	1.29667	1.13109e-31	1.56554e-30	60.4988
Slc25a10	-0.613534	1.01044	1.28507e-31	1.7769e-30	60.372
Ybx1-ps3	-0.661237	1.22065	1.2889e-31	1.78041e-30	60.369
Ppp3r1	-0.617439	1.38109	1.7581e-31	2.41888e-30	60.0606
Scap	-0.626527	1.88476	1.82103e-31	2.50048e-30	60.0257
Pdlim2	-0.612303	0.875897	1.88099e-31	2.57771e-30	59.9935
Plxnd1	-0.60364	1.01557	2.04066e-31	2.79099e-30	59.9126
C1qc	-0.714875	1.3644	2.18494e-31	2.98536e-30	59.8447
Map1lc3b	-0.595723	1.84193	2.79303e-31	3.80495e-30	59.6008
Smap1	-0.613231	1.14242	7.80931e-31	1.04232e-29	58.5796
Lgals3bp	0.629719	1.93881	8.55726e-31	1.13995e-29	58.4888
Ddrgk1	-0.598054	1.66427	1.19598e-30	1.58559e-29	58.1563
Arl8b	-0.612218	1.38427	1.25943e-30	1.66812e-29	58.1049
Psmd14	-0.611167	1.26733	1.30954e-30	1.73282e-29	58.0662
Nsfl1c	-0.588533	1.17302	1.78889e-30	2.36035e-29	57.7564
Ndufaf8	-0.618343	1.40683	1.95644e-30	2.57896e-29	57.6675
Hint2	-0.641121	1.52739	2.02395e-30	2.66045e-29	57.6338
Uso1	-0.5868	1.28098	2.25897e-30	2.95524e-29	57.5247
Ptpra	-0.614964	1.222	2.3934e-30	3.12814e-29	57.4673
Nbr1	-0.606487	1.12653	2.70687e-30	3.5345e-29	57.3451
Bola3	-0.611869	1.624	3.39527e-30	4.41672e-29	57.1201
Yipf3	-0.595969	1.48278	3.96282e-30	5.14052e-29	56.9666
Psme4	-0.587306	1.13414	4.4304e-30	5.73095e-29	56.8558
Glud1	-0.643206	1.61827	4.60157e-30	5.94681e-29	56.8182
Txndc15	-0.604646	1.50903	4.73743e-30	6.11668e-29	56.7893
Rnf14	-0.594972	1.21803	6.01841e-30	7.74171e-29	56.5516
Ehd4	-0.613238	1.4225	7.91875e-30	1.01203e-28	56.2791
Cited2	0.622365	1.39237	1.25384e-29	1.59361e-28	55.8228
Mvd	-0.641929	1.42312	1.32951e-29	1.68823e-28	55.7646
Ganab	-0.5922	1.89704	1.55406e-29	1.96976e-28	55.6097
Slc7a6	-0.619651	1.0231	4.55477e-29	5.64898e-28	54.5421
Mpv17l2	-0.604927	1.26392	6.44575e-29	7.92323e-28	54.1974
Sh3bgrl3	-0.628042	1.47139	8.70277e-29	1.06221e-27	53.8994
Atp6v1d	-0.605109	1.25603	9.65938e-29	1.17476e-27	53.7959
Nars	-0.589137	1.33491	2.16632e-28	2.57816e-27	52.9941
Carhsp1	-0.633537	1.74373	2.25523e-28	2.67707e-27	52.9542
Dbnl	-0.596257	1.57833	4.40065e-28	5.15308e-27	52.2907
Ifitm1	0.597782	2.31883	5.05797e-28	5.89784e-27	52.1526
NEWGENE-1308171	0.595881	0.845399	5.64042e-28	6.53844e-27	52.0444
Kmt2d	-0.607398	1.46565	6.51812e-28	7.51185e-27	51.9009
Elovl1	-0.602055	1.80981	1.59372e-27	1.80661e-26	51.0136
RT1-Da	-0.685629	1.67009	2.08328e-27	2.35385e-26	50.7478
Nampt	0.623656	1.49209	1.29719e-26	1.42609e-25	48.9334
Ldlr	0.596421	1.99911	1.49041e-26	1.63202e-25	48.7956
Gramd1a	-0.663936	1.45779	4.93303e-26	5.26431e-25	47.6084
Urod	-0.590662	1.24112	6.60007e-26	6.98407e-25	47.3197
Ptn	0.625375	1.55141	6.7977e-26	7.1877e-25	47.2904
Tyrobp	-0.652081	1.50918	4.92431e-25	5.04496e-24	45.3268
Fcer1g	-0.599316	1.13538	7.01983e-25	7.12328e-24	44.9753
Gpnmb	-0.694591	1.48981	1.42396e-24	1.42201e-23	44.2742
C1qa	-0.668961	1.87308	1.61566e-24	1.60765e-23	44.149
LOC100134871	-0.630032	0.90843	6.95483e-19	5.19211e-18	31.3068

[truncated: 4 more sheets: DEG in C2-9, DEG in C3-6, GO in C2-9, GO in C3-6]
